# Supplementary material for: The Potential Fungal Pathogens of Euonymus japonicus in Beijing, China
Source: MDPI journal article supplement (doi:10.3390/jof9020271), 2023-02-18
Supplement: s1 [file s1]

**Table S1.** Strains used in the molecular analyses in this study.

| Species                                | Strain <sup>1</sup> | Host                                          | Origin       | GenBank accession numbers |                 |             |            |             |              |              |            |             |
|----------------------------------------|---------------------|-----------------------------------------------|--------------|---------------------------|-----------------|-------------|------------|-------------|--------------|--------------|------------|-------------|
|                                        |                     |                                               |              | ITS                       | <i>tef1-α</i>   | <i>tub2</i> | <i>act</i> | <i>rpb2</i> | <i>gapdh</i> | <i>chs-1</i> | <i>cal</i> | <i>his3</i> |
| <i>Aplosporella africana</i>           | CBS 121777*         | <i>Acacia mellifera</i>                       | Namibia      | KF766196                  | EU101360        | –           | –          | –           | –            | –            | –          | –           |
| <i>Aplosporella africana</i>           | CBS 1217778*        | <i>Acacia mellifera</i>                       | Namibia      | EU101316                  | EU101361        | –           | –          | –           | –            | –            | –          | –           |
| <i>Aplosporella artocarp</i>           | CPC 22791*          | <i>Artocarpus heterophyllus</i>               | Thailand     | KM006450                  | KM006481        | –           | –          | –           | –            | –            | –          | –           |
| <i>Aplosporella ginkgonis</i>          | CFCC 52442*         | <i>Rhus typhina</i>                           | China        | MH133916                  | MH133950        | –           | –          | –           | –            | –            | –          | –           |
| <i>Aplosporella ginkgonis</i>          | CFCC 89661          | <i>Rhus typhina</i>                           | China        | KM030583                  | KM030597        | –           | –          | –           | –            | –            | –          | –           |
| <i>Aplosporella hesperidica</i>        | CBS 732.79*         | –                                             | –            | KX464083                  | –               | –           | –          | –           | –            | –            | –          | –           |
| <i>Aplosporella hesperidica</i>        | CBS 208.37          | <i>Citrus sinensis</i>                        | Zimbabwe     | JX681069                  | –               | –           | –          | –           | –            | –            | –          | –           |
| <b><i>Aplosporella hesperidica</i></b> | <b>CFCC 55554</b>   | <b><i>Euonymus japonicus</i></b>              | <b>China</b> | <b>OQ344679</b>           | –               | –           | –          | –           | –            | –            | –          | –           |
| <i>Aplosporella javeedii</i>           | CFCC 50054          | <i>Juniperus chinensis</i>                    | China        | KP208840                  | KP208846        | –           | –          | –           | –            | –            | –          | –           |
| <i>Aplosporella javeedii</i>           | CFCC 50052          | <i>Gleditsia sinensis</i>                     | China        | KP208838                  | KP208844        | –           | –          | –           | –            | –            | –          | –           |
| <b><i>Aplosporella javeedii</i></b>    | <b>CFCC 55489</b>   | <b><i>Euonymus japonicus</i></b>              | <b>China</b> | <b>OQ344672</b>           | <b>OQ354343</b> | –           | –          | –           | –            | –            | –          | –           |
| <b><i>Aplosporella javeedii</i></b>    | <b>CFCC 55553</b>   | <b><i>Euonymus japonicus</i></b>              | <b>China</b> | <b>OQ344677</b>           | –               | –           | –          | –           | –            | –            | –          | –           |
| <b><i>Aplosporella javeedii</i></b>    | <b>CFCC 55555</b>   | <b><i>Euonymus japonicus</i></b>              | <b>China</b> | <b>OQ344678</b>           | <b>OQ354348</b> | –           | –          | –           | –            | –            | –          | –           |
| <i>Aplosporella macropycnidia</i>      | CGMCC 3.17725*      | <i>Cerasus yedoensis</i>                      | China        | KT343648                  | KX011176        | –           | –          | –           | –            | –            | –          | –           |
| <i>Aplosporella macropycnidia</i>      | CGMCC 3.17726       | <i>Cerasus yedoensis</i>                      | China        | KT343649                  | KX011177        | –           | –          | –           | –            | –            | –          | –           |
| <i>Aplosporella papillata</i>          | CBS 121780*         | <i>Acacia tortillas</i>                       | South Africa | EU101328                  | EU101373        | –           | –          | –           | –            | –            | –          | –           |
| <i>Aplosporella papillata</i>          | CBS 121781          | <i>Acacia tortillas</i>                       | South Africa | EU101329                  | EU101374        | –           | –          | –           | –            | –            | –          | –           |
| <i>Aplosporella prunicola</i>          | CBS 121167*         | <i>Prunus persica</i> var. <i>nucipersica</i> | South Africa | KF766147                  | –               | –           | –          | –           | –            | –            | –          | –           |
| <i>Aplosporella prunicola</i>          | STE-U 6326          | <i>Prunus persica</i> var. <i>nucipersica</i> | South Africa | EF564375                  | –               | –           | –          | –           | –            | –            | –          | –           |
| <b><i>Aplosporella prunicola</i></b>   | <b>CFCC 55550</b>   | <b><i>Euonymus japonicus</i></b>              | <b>China</b> | <b>OQ344673</b>           | <b>OQ354344</b> | –           | –          | –           | –            | –            | –          | –           |
| <b><i>Aplosporella prunicola</i></b>   | <b>CFCC 55551</b>   | <b><i>Euonymus japonicus</i></b>              | <b>China</b> | <b>OQ344674</b>           | <b>OQ354345</b> | –           | –          | –           | –            | –            | –          | –           |

|                                 |                                 |                                 |                   |          |          |          |   |   |   |   |   |   |
|---------------------------------|---------------------------------|---------------------------------|-------------------|----------|----------|----------|---|---|---|---|---|---|
| <i>Aplosporella prunicola</i>   | CFCC 55552                      | <i>Euonymus japonicus</i>       | China             | OQ344675 | OQ354346 | –        | – | – | – | – | – | – |
| <i>Aplosporella prunicola</i>   | CFCC 57541                      | <i>Euonymus japonicus</i>       | China             | OQ344676 | OQ354347 | –        | – | – | – | – | – | – |
| <i>Aplosporella sophorae</i>    | CPC 29688*                      | <i>Sophora microphylla</i>      | New Zealand North | KY173388 | –        | –        | – | – | – | – | – | – |
| <i>Aplosporella thailandica</i> | MFLU 16-0615*                   | Dead stems                      | Thailand          | KX423536 | KX423537 | –        | – | – | – | – | – | – |
| <i>Aplosporella yalgorensis</i> | MUCC511*                        | <i>Acacia cochlearis</i>        | Australia         | EF591926 | EF591977 | –        | – | – | – | – | – | – |
| <i>Aplosporella yalgorensis</i> | MUCC512                         | <i>Eucalyptus gomphocephala</i> | Australia         | EF591927 | EF591978 | –        | – | – | – | – | – | – |
| <i>Alanomyces indica</i>        | CBS 134264                      | Soil                            | India             | HF563622 | AB872219 | –        | – | – | – | – | – | – |
| <i>Botryosphaeria agaves</i>    | CBS 133992* =<br>MFLUCC 11-0125 | <i>Agave</i> sp.                | Thailand          | JX646791 | JX646856 | JX646841 | – | – | – | – | – | – |
| <i>Botryosphaeria agaves</i>    | CBS 141505 =<br>CPC 26299       | <i>Agave</i> sp.                | France            | KX306750 | MT592030 | MT592463 | – | – | – | – | – | – |
| <i>Botryosphaeria agaves</i>    | MFLUCC 10-<br>0051              | <i>Agave</i> sp.                | Thailand          | JX646790 | JX646855 | JX646840 | – | – | – | – | – | – |
| <i>Botryosphaeria corticis</i>  | ATCC 22927                      | <i>Vaccinium</i> sp.            | USA               | DQ299247 | EU673291 | EU673108 | – | – | – | – | – | – |
| <i>Botryosphaeria corticis</i>  | CBS 119047* =<br>CAP 197        | <i>Vaccinium corymbosum</i>     | USA               | DQ299245 | EU017539 | EU673107 | – | – | – | – | – | – |
| <i>Botryosphaeria corticis</i>  | CBS 119048 =<br>CAP 198         | <i>Vaccinium corymbosum</i>     | USA               | DQ299246 | EU017540 | MT592464 | – | – | – | – | – | – |
| <i>Botryosphaeria dothidea</i>  | CBS 110302                      | <i>Vitis vinifera</i>           | Portugal          | AY259092 | AY573218 | EU673106 | – | – | – | – | – | – |
| <i>Botryosphaeria dothidea</i>  | CBS 110484                      | <i>Vitis vinifera</i>           | Argentina         | MT587330 | AY343350 | MT592466 | – | – | – | – | – | – |
| <i>Botryosphaeria dothidea</i>  | CBS 115476*                     | <i>Prunus</i> sp.               | Switzerland       | AY236949 | AY236898 | AY236927 | – | – | – | – | – | – |
| <i>Botryosphaeria dothidea</i>  | CBS 121557                      | <i>Olea europea</i>             | Italy             | EF638747 | EF638727 | MT592467 | – | – | – | – | – | – |
| <i>Botryosphaeria dothidea</i>  | CBS 121769                      | <i>Acacia mellifera</i>         | Namibia           | EU101303 | EU101348 | –        | – | – | – | – | – | – |
| <i>Botryosphaeria dothidea</i>  | CBS 123530                      | <i>Diospyros glabra</i>         | South Africa      | MT587329 | MT592031 | MT592465 | – | – | – | – | – | – |

|                                       |                              |                                  |              |                 |                 |                 |   |   |   |   |   |   |
|---------------------------------------|------------------------------|----------------------------------|--------------|-----------------|-----------------|-----------------|---|---|---|---|---|---|
| <i>Botryosphaeria dothidea</i>        | CBS 145971                   | <i>Grevillea</i> sp.             | Australia    | MT587332        | MT592034        | MT592470        | – | – | – | – | – | – |
| <i>Botryosphaeria dothidea</i>        | CERC 1976                    | English walnut                   | China        | KR261706        | KR261718        | KR261730        | – | – | – | – | – | – |
| <i>Botryosphaeria dothidea</i>        | CERC 2298 =<br>CGMCC 3.18744 | <i>Cedrus deodara</i>            | China        | KX278002        | KX278107        | KX278211        | – | – | – | – | – | – |
| <i>Botryosphaeria dothidea</i>        | CERC 2299 =<br>CGMCC 3.18745 | <i>Cedrus deodara</i>            | China        | KX278003        | KX278108        | KX278212        | – | – | – | – | – | – |
| <i>Botryosphaeria dothidea</i>        | CGMCC 3.17723                | <i>Morus</i> sp.                 | China        | KT343254        | KU221233        | KX197107        | – | – | – | – | – | – |
| <i>Botryosphaeria dothidea</i>        | CGMCC 3.17724                | <i>Juglans regia</i>             | China        | KT343256        | KU221234        | KX197108        | – | – | – | – | – | – |
| <i>Botryosphaeria dothidea</i>        | CMW 25215                    | <i>Mangifera indica</i>          | South Africa | KU997394        | KU997130        | KU997568        | – | – | – | – | – | – |
| <i>Botryosphaeria dothidea</i>        | CMW 7999                     | <i>Ostrya</i> sp.                | Switzerland  | AY236948        | AY236897        | AY236926        | – | – | – | – | – | – |
| <i>Botryosphaeria dothidea</i>        | DAR 78224                    | <i>Vitis vinifera</i>            | Australia    | EU137878        | EU13788         | EU137880        | – | – | – | – | – | – |
| <i>Botryosphaeria dothidea</i>        | GZCC 16-0013                 | Dead wood                        | China        | KX447675        | KX447678        | –               | – | – | – | – | – | – |
| <i>Botryosphaeria dothidea</i>        | GZCC 16-0014                 | Dead wood                        | China        | KX447676        | KX447679        | –               | – | – | – | – | – | – |
| <i>Botryosphaeria dothidea</i>        | MFLUCC 14-<br>0459           | <i>Quercus</i> sp.,              | Italy        | KU848199        | –               | –               | – | – | – | – | – | – |
| <i>Botryosphaeria dothidea</i>        | MUCC 500                     | <i>Eucalyptus marginata</i>      | Australia    | EF591915        | EF591968        | EF591951        | – | – | – | – | – | – |
| <i>Botryosphaeria dothidea</i>        | MUCC 501                     | <i>Eucalyptus marginata</i>      | Australia    | EF591916        | EF591969        | EF591952        | – | – | – | – | – | – |
| <i>Botryosphaeria dothidea</i>        | MUCC 503                     | <i>Acacia rostellifera</i>       | Australia    | EF591918        | EF591970        | EF591953        | – | – | – | – | – | – |
| <i>Botryosphaeria dothidea</i>        | PD 296 = WAC<br>12404 = WA7  | <i>Eucalyptus calophylla</i>     | Australia    | GU251104        | GU251236        | GU251764        | – | – | – | – | – | – |
| <b><i>Botryosphaeria dothidea</i></b> | <b>CFCC 55490</b>            | <b><i>Euonymus japonicus</i></b> | <b>China</b> | <b>OQ344707</b> | <b>OQ410515</b> | <b>OQ410536</b> | – | – | – | – | – | – |
| <b><i>Botryosphaeria dothidea</i></b> | <b>CFCC 55491</b>            | <b><i>Euonymus japonicus</i></b> | <b>China</b> | <b>OQ344708</b> | <b>OQ410516</b> | <b>OQ410537</b> | – | – | – | – | – | – |

|                                |            |                           |       |          |          |          |   |   |   |   |   |   |
|--------------------------------|------------|---------------------------|-------|----------|----------|----------|---|---|---|---|---|---|
| <i>Botryosphaeria dothidea</i> | CFCC 55492 | <i>Euonymus japonicus</i> | China | OQ344695 | OQ410503 | OQ410524 | – | – | – | – | – | – |
| <i>Botryosphaeria dothidea</i> | CFCC 55493 | <i>Euonymus japonicus</i> | China | OQ344696 | OQ410504 | OQ410525 | – | – | – | – | – | – |
| <i>Botryosphaeria dothidea</i> | CFCC 55494 | <i>Euonymus japonicus</i> | China | OQ344697 | OQ410505 | OQ410526 | – | – | – | – | – | – |
| <i>Botryosphaeria dothidea</i> | CFCC 55495 | <i>Euonymus japonicus</i> | China | OQ344698 | OQ410506 | OQ410527 | – | – | – | – | – | – |
| <i>Botryosphaeria dothidea</i> | CFCC 55496 | <i>Euonymus japonicus</i> | China | OQ344694 | OQ410502 | OQ410523 | – | – | – | – | – | – |
| <i>Botryosphaeria dothidea</i> | CFCC 55564 | <i>Euonymus japonicus</i> | China | OQ344711 | OQ410519 | OQ410540 | – | – | – | – | – | – |
| <i>Botryosphaeria dothidea</i> | CFCC 55565 | <i>Euonymus japonicus</i> | China | OQ344713 | OQ410521 | OQ410542 | – | – | – | – | – | – |
| <i>Botryosphaeria dothidea</i> | CFCC 55566 | <i>Euonymus japonicus</i> | China | OQ344706 | OQ410514 | OQ410535 | – | – | – | – | – | – |
| <i>Botryosphaeria dothidea</i> | CFCC 55567 | <i>Euonymus japonicus</i> | China | OQ344704 | OQ410512 | OQ410533 | – | – | – | – | – | – |
| <i>Botryosphaeria dothidea</i> | CFCC 55568 | <i>Euonymus japonicus</i> | China | OQ344705 | OQ410513 | OQ410534 | – | – | – | – | – | – |
| <i>Botryosphaeria dothidea</i> | CFCC 55569 | <i>Euonymus japonicus</i> | China | OQ344699 | OQ410507 | OQ410528 | – | – | – | – | – | – |
| <i>Botryosphaeria dothidea</i> | CFCC 55570 | <i>Euonymus japonicus</i> | China | OQ344700 | OQ410508 | OQ410529 | – | – | – | – | – | – |
| <i>Botryosphaeria dothidea</i> | CFCC 55571 | <i>Euonymus japonicus</i> | China | OQ344701 | OQ410509 | OQ410530 | – | – | – | – | – | – |
| <i>Botryosphaeria dothidea</i> | CFCC 55572 | <i>Euonymus japonicus</i> | China | OQ344702 | OQ410510 | OQ410531 | – | – | – | – | – | – |
| <i>Botryosphaeria dothidea</i> | CFCC 55575 | <i>Euonymus japonicus</i> | China | OQ344709 | OQ410517 | OQ410538 | – | – | – | – | – | – |
| <i>Botryosphaeria dothidea</i> | CFCC 55576 | <i>Euonymus japonicus</i> | China | OQ344710 | OQ410518 | OQ410539 | – | – | – | – | – | – |
| <i>Botryosphaeria dothidea</i> | CFCC 55577 | <i>Euonymus japonicus</i> | China | OQ344712 | OQ410520 | OQ410541 | – | – | – | – | – | – |
| <i>Botryosphaeria dothidea</i> | CFCC 55578 | <i>Euonymus japonicus</i> | China | OQ344714 | OQ410522 | OQ410543 | – | – | – | – | – | – |

|                                       |                             |                                  |              |                 |                 |                 |   |   |   |   |   |   |
|---------------------------------------|-----------------------------|----------------------------------|--------------|-----------------|-----------------|-----------------|---|---|---|---|---|---|
| <b><i>Botryosphaeria dothidea</i></b> | <b>CFCC 55618</b>           | <b><i>Euonymus japonicus</i></b> | <b>China</b> | <b>OQ344703</b> | <b>OQ410511</b> | <b>OQ410532</b> | – | – | – | – | – | – |
| <i>Botryosphaeria fabicerciana</i>    | CERC 2930                   | <i>Eucalyptus</i> hybrid         | China        | KX277987        | KX278092        | KX278196        | – | – | – | – | – | – |
| <i>Botryosphaeria fabicerciana</i>    | CERC 2949                   | <i>Eucalyptus</i> hybrid         | China        | KX277984        | KX278089        | KX278194        | – | – | – | – | – | – |
| <i>Botryosphaeria fabicerciana</i>    | CERC 3441                   | <i>Eucalyptus</i> hybrid         | China        | KX277974        | KX278079        | KX278184        | – | – | – | – | – | – |
| <i>Botryosphaeria fabicerciana</i>    | CERC 3469                   | <i>Eucalyptus</i> hybrid         | China        | KX277975        | KX278080        | KX278185        | – | – | – | – | – | – |
| <i>Botryosphaeria fabicerciana</i>    | CPC 29629                   | <i>Mangifera indica</i>          | USA          | MT587331        | MT592033        | MT592469        | – | – | – | – | – | – |
| <i>Botryosphaeria fabicerciana</i>    | MFLUCC 10-0098*             | <i>Entada</i> sp.                | Thailand     | JX646789        | JX646854        | JX646839        | – | – | – | – | – | – |
| <i>Botryosphaeria fabicerciana</i>    | MFLUCC 11-0507              | <i>Entada</i> sp.                | Thailand     | JX646788        | JX646853        | JX646838        | – | – | – | – | – | – |
| <i>Botryosphaeria kuwatsukai</i>      | CBS 135219* = PG 2          | <i>Malus domestica</i>           | China        | KJ433388        | KJ433410        | –               | – | – | – | – | – | – |
| <i>Botryosphaeria kuwatsukai</i>      | CGMCC 3.18007               | <i>Malus</i> sp.                 | China        | KX197074        | KX197094        | KX197101        | – | – | – | – | – | – |
| <i>Botryosphaeria kuwatsukai</i>      | CGMCC 3.18008               | <i>Amygdalus</i> sp.             | China        | KX197075        | KX197095        | KX197102        | – | – | – | – | – | – |
| <i>Botryosphaeria kuwatsukai</i>      | LSP 5                       | <i>Pyrus</i> sp.                 | China        | KJ433395        | KJ433417        | –               | – | – | – | – | – | – |
| <i>Botryosphaeria qingyuanensis</i>   | CERC 2946 = CGMCC 3.18742*  | <i>Eucalyptus</i> hybrid         | China        | KX278000        | KX278105        | KX278209        | – | – | – | – | – | – |
| <i>Botryosphaeria qingyuanensis</i>   | CERC 2947 = CGMCC 3.18743   | <i>Eucalyptus</i> hybrid         | China        | KX278001        | KX278106        | KX278210        | – | – | – | – | – | – |
| <i>Botryosphaeria ramosa</i>          | CBS 122069* = CMW 26167     | <i>Eucalyptus camaldulensis</i>  | Australia    | EU144055        | EU144070        | KF766132        | – | – | – | – | – | – |
| <i>Botryosphaeria ramosa</i>          | CERC 1999                   | <i>Eucalyptus</i> hybrid         | China        | KX277988        | KX278093        | KX278197        | – | – | – | – | – | – |
| <i>Botryosphaeria ramosa</i>          | CERC 2001 = CGMCC 3.187396* | <i>Eucalyptus</i> hybrid         | China        | KX277989        | KX278094        | KX278198        | – | – | – | – | – | – |
| <i>Botryosphaeria scharifii</i>       | CBS 124702 = IRAN 1543C     | <i>Mangifera indica</i>          | Iran         | JQ772019        | JQ772056        | –               | – | – | – | – | – | – |
| <i>Botryosphaeria scharifii</i>       | CBS 124703* = IRAN 1529C    | <i>Mangifera indica</i>          | Iran         | JQ772020        | JQ772057        | –               | – | – | – | – | – | – |

|                                     |                                |                                  |              |                 |                 |                 |   |   |   |   |   |   |
|-------------------------------------|--------------------------------|----------------------------------|--------------|-----------------|-----------------|-----------------|---|---|---|---|---|---|
| <i>Cophinforma eucalypti</i>        | CBS 134651 =<br>MFLUCC 11-0425 | <i>Eucalyptus</i> sp.            | Thailand     | JX646800        | JX646865        | JX64684         | – | – | – | – | – | – |
| <i>Dothiorella acacicola</i>        | CBS 141295* =<br>CPC 26349     | <i>Acacia mearnsii</i>           | France       | KX228269        | KX228376        | –               | – | – | – | – | – | – |
| <i>Dothiorella acericola</i>        | HNXX032                        | <i>Ziziphus jujuba</i>           | China        | KY385661        | KY393212        | KY393178        | – | – | – | – | – | – |
| <i>Dothiorella acericola</i>        | KUMCC 18-0137*                 | <i>Acer palmatum</i>             | China        | MK359449        | MK361182        | –               | – | – | – | – | – | – |
| <b><i>Dothiorella acericola</i></b> | <b>CFCC 55556</b>              | <b><i>Euonymus japonicus</i></b> | <b>China</b> | <b>OQ344756</b> | <b>OQ410574</b> | <b>OQ410578</b> | – | – | – | – | – | – |
| <b><i>Dothiorella acericola</i></b> | <b>CFCC 55558</b>              | <b><i>Euonymus japonicus</i></b> | <b>China</b> | <b>OQ344757</b> | <b>OQ410575</b> | <b>OQ410579</b> | – | – | – | – | – | – |
| <b><i>Dothiorella acericola</i></b> | <b>CFCC 55559</b>              | <b><i>Euonymus japonicus</i></b> | <b>China</b> | <b>OQ344758</b> | <b>OQ410576</b> | <b>OQ410580</b> | – | – | – | – | – | – |
| <b><i>Dothiorella acericola</i></b> | <b>CFCC 55561</b>              | <b><i>Euonymus japonicus</i></b> | <b>China</b> | <b>OQ344759</b> | <b>OQ410577</b> | <b>OQ410581</b> | – | – | – | – | – | – |
| <i>Dothiorella alpina</i>           | CGMCC 3.18001*                 | <i>Platycladus orientalis</i>    | China        | KX499645        | KX499651        | –               | – | – | – | – | – | – |
| <i>Dothiorella brevicollis</i>      | CBS 130411* =<br>CMW 36463     | <i>Acacia karroo</i>             | South Africa | JQ239403        | JQ239390        | JQ239371        | – | – | – | – | – | – |
| <i>Dothiorella brevicollis</i>      | CBS 130412 =<br>CMW 36464      | <i>Acacia karroo</i>             | South Africa | MT587395        | MT592107        | MT59257         | – | – | – | – | – | – |
| <i>Dothiorella californica</i>      | CBS 119635                     | <i>Laurus nobilis</i>            | Turkey       | MT587396        | MT592108        | MT592579        | – | – | – | – | – | – |
| <i>Dothiorella californica</i>      | CBS 141587*                    | <i>Umbellularia californica</i>  | USA          | KX357188        | KX357211        | KX357165        | – | – | – | – | – | – |
| <i>Dothiorella capri-amissi</i>     | CBS 121763*                    | <i>Acacia erioloba</i>           | South Africa | EU101323        | EU101368        | KX464850        | – | – | – | – | – | – |
| <i>Dothiorella capri-amissi</i>     | CBS 121878*                    | <i>Acacia erioloba</i>           | South Africa | EU101324        | EU101369        | KX464851        | – | – | – | – | – | – |
| <i>Dothiorella casuarinae</i>       | CBS 120688*                    | <i>Casuarina</i> sp.             | Australia    | DQ846773        | DQ875331        | DQ875340        | – | – | – | – | – | – |
| <i>Dothiorella casuarinae</i>       | CBS 120689                     | <i>Casuarina</i> sp.             | Australia    | DQ846772        | DQ875332        | DQ875339        | – | – | – | – | – | – |
| <i>Dothiorella casuarinae</i>       | CBS 120690                     | <i>Casuarina</i> sp.             | Australia    | DQ846774        | DQ875333        | DQ875341        | – | – | – | – | – | – |
| <i>Dothiorella citricola</i>        | CBS 124728                     | <i>Citrus cinensis</i>           | New Zealand  | EU673322        | EU673289        | KX464852        | – | – | – | – | – | – |
| <i>Dothiorella citricola</i>        | CBS 124729*                    | <i>Citrus cinensis</i>           | New Zealand  | EU673323        | EU673290        | KX464853        | – | – | – | – | – | – |
| <i>Dothiorella citricola</i>        | CBS 130415                     | <i>Acacia karroo</i>             | South Africa | MT587397        | MT592109        | MT592580        | – | – | – | – | – | – |
| <i>Dothiorella diospyricola</i>     | CBS 145972*                    | <i>Diospyros mespiliformis</i>   | South Africa | MT587398        | MT592110        | MT592581        | – | – | – | – | – | – |
| <i>Dothiorella dulcispinae</i>      | CBS 121764                     | <i>Acacia mellifera</i>          | Namibia      | EU101299        | EU101344        | KX464854        | – | – | – | – | – | – |
| <i>Dothiorella dulcispinae</i>      | CBS 121765*                    | <i>Acacia mellifera</i>          | South Africa | EU101300        | EU101345        | KX464862        | – | – | – | – | – | – |
| <i>Dothiorella dulcispinae</i>      | CBS 121766                     | <i>Acacia mellifera</i>          | South Africa | EU101301        | EU101346        | KX464863        | – | – | – | – | – | – |
| <i>Dothiorella dulcispinae</i>      | CBS 130413                     | <i>Acacia karroo</i>             | South Africa | JQ239400        | JQ239387        | JQ239373        | – | – | – | – | – | – |
| <i>Dothiorella dulcispinae</i>      | CBS 130414                     | <i>Acacia karroo</i>             | South Africa | MT587408        | MT592120        | MT592598        | – | – | – | – | – | – |
| <i>Dothiorella eriobotryae</i>      | CBS 140852*                    | <i>Eriobotrya japonica</i>       | Spain        | KT240287        | KT240262        | MT592582        | – | – | – | – | – | – |

|                                |                 |                                     |             |          |          |          |   |   |   |   |   |   |
|--------------------------------|-----------------|-------------------------------------|-------------|----------|----------|----------|---|---|---|---|---|---|
| <i>Dothiorella eriobotryae</i> | CBS 145976      | <i>Rhamnus saxatilis</i>            | Austria     | MT587399 | MT592111 | MT592583 | – | – | – | – | – | – |
| <i>Dothiorella eriobotryae</i> | MFLUCC 14-0902  | <i>Rhamnus cathartica</i>           | Russia      | KU246381 | –        | –        | – | – | – | – | – | – |
| <i>Dothiorella guttulata</i>   | CBS 134886      | <i>Cotinus coggygria</i>            | Slovenia    | FM955384 | FM955416 | MT592584 | – | – | – | – | – | – |
| <i>Dothiorella guttulata</i>   | CBS 134888      | <i>Ostrya carpinifolia</i>          | Italy       | FM955386 | FM955420 | MT592585 | – | – | – | – | – | – |
| <i>Dothiorella guttulata</i>   | MFLUCC 17-0242* | <i>Alnus glutinosa</i>              | Italy       | KY797637 | –        | –        | – | – | – | – | – | – |
| <i>Dothiorella iberica</i>     | CBS 121001      | <i>Vitis vinifera</i> cv. Zinfande  | USA         | MT587420 | MT592132 | MT592612 | – | – | – | – | – | – |
| <i>Dothiorella iberica</i>     | PD257           | <i>Quercus ilex</i>                 | Spain       | GU251168 | GU251300 | GU251828 | – | – | – | – | – | – |
| <i>Dothiorella iberica</i>     | UCD1448SLO      | <i>Vitis vinifera</i>               | USA         | EF202009 | EF202023 | EF202016 | – | – | – | – | – | – |
| <i>Dothiorella iberica</i>     | CBS 113189      | <i>Quercus ilex</i>                 | Spain       | AY573199 | AY573230 | KX464855 | – | – | – | – | – | – |
| <i>Dothiorella iberica</i>     | CBS 115035      | <i>Quercus ilex</i>                 | Spain       | AY573213 | AY573228 | MT592586 | – | – | – | – | – | – |
| <i>Dothiorella iberica</i>     | CBS 115036      | <i>Quercus ruber</i>                | Spain       | AY573216 | AY573233 | MT592587 | – | – | – | – | – | – |
| <i>Dothiorella iberica</i>     | CBS 115037      | <i>Quercus ruber</i>                | Spain       | AY573201 | AY573229 | MT592588 | – | – | – | – | – | – |
| <i>Dothiorella iberica</i>     | CBS 115039      | <i>Quercus</i> sp                   | Italy       | AY573210 | AY573234 | MT592589 | – | – | – | – | – | – |
| <i>Dothiorella iberica</i>     | CBS 115040      | <i>Quercus ilex</i>                 | Spain       | AY573214 | AY573232 | MT592590 | – | – | – | – | – | – |
| <i>Dothiorella iberica</i>     | CBS 115041*     | <i>Quercus ilex</i>                 | Spain       | AY573202 | AY573222 | EU673096 | – | – | – | – | – | – |
| <i>Dothiorella iberica</i>     | CBS 130984      | <i>Cupressus macrocarpa</i>         | Algeria     | MT587400 | MT592112 | MT592591 | – | – | – | – | – | – |
| <i>Dothiorella iberica</i>     | CBS 133500      | <i>Persea americana</i>             | USA         | MT587410 | MT592122 | MT592602 | – | – | – | – | – | – |
| <i>Dothiorella iberica</i>     | UCR-DI3         | Aerial spore trap in almond orchard | USA         | KP012591 | KP828802 | KP067201 | – | – | – | – | – | – |
| <i>Dothiorella iberica</i>     | UCROK1227       | <i>Quercus agrifolia</i>            | USA         | JQ411405 | JQ512114 | JQ411436 | – | – | – | – | – | – |
| <i>Dothiorella iberica</i>     | UCROK1396       | <i>Quercus agrifolia</i>            | USA         | JQ411406 | JQ512115 | JQ411437 | – | – | – | – | – | – |
| <i>Dothiorella iranica</i>     | CBS 124722*     | <i>Olea</i> sp.,                    | Iran        | KC898231 | KC898214 | KX464856 | – | – | – | – | – | – |
| <i>Dothiorella italica</i>     | CBS 115038      | <i>Malus pumila</i>                 | Netherlands | AY573206 | AY573223 | EU673101 | – | – | – | – | – | – |
| <i>Dothiorella italica</i>     | CBS 122805      | <i>Prunus dulcis</i>                | Spain       | MT587401 | MT592113 | MT592592 | – | – | – | – | – | – |
| <i>Dothiorella italica</i>     | CBS 122806      | <i>Prunus dulcis</i>                | Spain       | MT587402 | MT592114 | MT592593 | – | – | – | – | – | – |
| <i>Dothiorella italica</i>     | CBS 910.73      | <i>Acer pseudoplatanus</i>          | Germany     | EU673315 | EU673282 | EU673139 | – | – | – | – | – | – |
| <i>Dothiorella italica</i>     | CPC 30616       | <i>Taxus baccata</i>                | Germany     | MT587403 | MT592115 | MT592594 | – | – | – | – | – | – |
| <i>Dothiorella italica</i>     | CPC 33887       | <i>Lonicera tatarica</i>            | Germany     | MT587404 | MT592116 | MT592595 | – | – | – | – | – | – |
| <i>Dothiorella italica</i>     | CPC 35506       | <i>Lonicera xylosteum</i>           | Germany     | MT587405 | MT592117 | MT592596 | – | – | – | – | – | – |
| <i>Dothiorella italica</i>     | CPC 35540       | <i>Rubus idaeus</i>                 | Ukraine     | MT587406 | MT592118 | MT592597 | – | – | – | – | – | – |
| <i>Dothiorella italica</i>     | MFLUCC 17-0951* | <i>Rosa canina</i>                  | Italy       | MF398891 | MF398943 | –        | – | – | – | – | – | – |

|                                  |                       |                                     |              |          |          |          |   |   |   |   |   |   |
|----------------------------------|-----------------------|-------------------------------------|--------------|----------|----------|----------|---|---|---|---|---|---|
| <i>Dothiorella lampangensis</i>  | MFLUCC 18-0232*       | <i>Rutaceae</i>                     | Thailand     | MK347758 | MK340869 | MK412874 | – | – | – | – | – | – |
| <i>Dothiorella longicollis</i>   | CBS 122066            | <i>Terminalia</i> sp.               | Australia    | EU144052 | EU144067 | KX464857 | – | – | – | – | – | – |
| <i>Dothiorella longicollis</i>   | CBS 122067            | <i>Lysiphyllum cunninghamii</i>     | Australia    | EU144053 | EU144068 | KX464858 | – | – | – | – | – | – |
| <i>Dothiorella longicollis</i>   | CBS 122068*           | <i>Lysiphyllum cunninghamii</i>     | Australia    | EU144054 | EU144069 | KF766130 | – | – | – | – | – | – |
| <i>Dothiorella magnoliae</i>     | CFCC 51563*           | <i>Magnolia grandiflora</i>         | China        | KY111247 | KY213686 | –        | – | – | – | – | – | – |
| <i>Dothiorella magnoliae</i>     | CFCC 51564            | <i>Magnolia grandiflora</i>         | China        | KY111248 | KY213687 | –        | – | – | – | – | – | – |
| <i>Dothiorella mangifericola</i> | CBS 121760*           | <i>Acacia karroo</i>                | Namibia      | KF766227 | EU101335 | KX464877 | – | – | – | – | – | – |
| <i>Dothiorella mangifericola</i> | CBS 121761            | <i>Acacia mellifera</i>             | South Africa | EU101293 | EU101338 | KX464878 | – | – | – | – | – | – |
| <i>Dothiorella mangifericola</i> | CBS 124726            | <i>Mangifera indica</i>             | Iran         | MT587407 | MT592119 | –        | – | – | – | – | – | – |
| <i>Dothiorella mangifericola</i> | CBS 124727*           | <i>Mangifera indica</i>             | Iran         | KC898221 | KX464614 | –        | – | – | – | – | – | – |
| <i>Dothiorella moneti</i>        | WAC 13154* = MUCC 505 | <i>Acacia rostellifera</i>          | Australia    | EF591920 | EF591971 | EF591954 | – | – | – | – | – | – |
| <i>Dothiorella omnivora</i>      | CBS 124716            | <i>Juglans regia</i>                | Iran         | KC898232 | KC898215 | KX464864 | – | – | – | – | – | – |
| <i>Dothiorella omnivora</i>      | CBS 140349*           | <i>Corylus avellana</i>             | Italy        | KP205497 | KP205470 | –        | – | – | – | – | – | – |
| <i>Dothiorella omnivora</i>      | CBS 188.87            | <i>Juglans regia</i>                | France       | EU673316 | EU673283 | EU673119 | – | – | – | – | – | – |
| <i>Dothiorella parva</i>         | CBS 124720*           | <i>Corylus</i> sp.                  | Iran         | KC898234 | KC898217 | KX464866 | – | – | – | – | – | – |
| <i>Dothiorella parva</i>         | CBS 124721            | <i>Corylus</i> sp.                  | Iran         | KX464123 | KX464615 | KX464867 | – | – | – | – | – | – |
| <i>Dothiorella parva</i>         | CBS 134885            | <i>Ostrya carpinifolia</i>          | Slovenia     | FM955391 | FM955423 | MT592599 | – | – | – | – | – | – |
| <i>Dothiorella parva</i>         | CBS 134887            | <i>Ostrya carpinifolia</i>          | Italy        | FM955385 | FM955417 | MT592600 | – | – | – | – | – | – |
| <i>Dothiorella plurivora</i>     | CBS 124724*           | <i>Citrus</i> sp.                   | Iran         | KC898225 | KC898208 | KX464874 | – | – | – | – | – | – |
| <i>Dothiorella pretoriensis</i>  | CBS 130404*           | <i>Acacia karroo</i>                | South Africa | JQ239405 | JQ239392 | JQ239376 | – | – | – | – | – | – |
| <i>Dothiorella prunicola</i>     | CBS 124723*           | <i>Prunus dulcis</i>                | Portugal     | EU673313 | EU673280 | EU673100 | – | – | – | – | – | – |
| <i>Dothiorella santali</i>       | WAC 13155*            | <i>Santalum acuminatum</i>          | Australia    | EF591924 | EF591975 | EF591958 | – | – | – | – | – | – |
| <i>Dothiorella sarmentorum</i>   | CBS 128309*           | <i>Vitis vinifera</i>               | USA          | HQ288218 | HQ288262 | HQ288297 | – | – | – | – | – | – |
| <i>Dothiorella sarmentorum</i>   | CBS 128310            | <i>Vitis vinifera</i> cv. Chardonet | USA          | MH864852 | MT592106 | MT592577 | – | – | – | – | – | – |
| <i>Dothiorella sarmentorum</i>   | CBS 164.33            | <i>Ulmus</i> sp                     | Netherlands  | KX464127 | KX464619 | KX464881 | – | – | – | – | – | – |

|                                      |                 |                                      |              |          |          |          |   |   |   |   |   |   |
|--------------------------------------|-----------------|--------------------------------------|--------------|----------|----------|----------|---|---|---|---|---|---|
| <i>Dothiorella sarmentorum</i>       | CPC 31043       | <i>Tilia platyphyllos</i>            | Germany      | MT587409 | MT592121 | MT592601 | – | – | – | – | – | – |
| <i>Dothiorella sarmentorum</i>       | IMI 63581b*     | <i>Ulmus</i> sp.                     | UK           | AY573212 | AY573235 | EU673102 | – | – | – | – | – | – |
| <i>Dothiorella sempervirentis</i>    | CBS 124718*     | <i>Cupressus sempervirens</i>        | Iran         | KC898236 | KC898220 | KX464884 | – | – | – | – | – | – |
| <i>Dothiorella sempervirentis</i>    | CBS 124719      | <i>Cupressus sempervirens</i>        | Iran         | KC898237 | KC898219 | KX464885 | – | – | – | – | – | – |
| <i>Dothiorella</i> sp. 1             | CBS 121783      | <i>Acacia mearnsii</i>               | South Africa | EU101333 | EU101378 | KX464859 | – | – | – | – | – | – |
| <i>Dothiorella</i> sp. 2             | CBS 121784      | <i>Acacia mearnsii</i>               | South Africa | EU101331 | EU101376 | KX464860 | – | – | – | – | – | – |
| <i>Dothiorella</i> sp. 3             | CBS 121785      | <i>Acacia mearnsii</i>               | South Africa | EU101334 | EU101379 | KX464861 | – | – | – | – | – | – |
| <i>Dothiorella striata</i>           | CBS 124730      | <i>Citrus cinensis</i>               | New Zealand  | EU673320 | EU673287 | EU673142 | – | – | – | – | – | – |
| <i>Dothiorella striata</i>           | CBS 124731*     | <i>Citrus cinensis</i>               | New Zealand  | EU673321 | EU673288 | EU673143 | – | – | – | – | – | – |
| <i>Dothiorella striata</i>           | DAR 80992*      | <i>Vitis vinifera</i> cv. Chardonnay | Australia    | KJ573643 | KJ573640 | KJ577551 | – | – | – | – | – | – |
| <i>Dothiorella symphoricarpicola</i> | CBS 135622      | <i>Chamaecyparis atlantica</i>       | Serbia       | KF261725 | KF261729 | KF261731 | – | – | – | – | – | – |
| <i>Dothiorella symphoricarpicola</i> | CBS 135623      | <i>Thuja plicata</i>                 | Serbia       | KF040058 | KF261728 | KF261730 | – | – | – | – | – | – |
| <i>Dothiorella symphoricarpicola</i> | CBS 135847      | <i>Chamaecyparis atlantica</i>       | Serbia       | KF575016 | KF575051 | KF575112 | – | – | – | – | – | – |
| <i>Dothiorella symphoricarpicola</i> | CPC 30972       | <i>Elaeagnus rhamnoides</i>          | Germany      | MT587411 | MT592123 | MT592603 | – | – | – | – | – | – |
| <i>Dothiorella symphoricarpicola</i> | CPC 30976       | <i>Tilia platyphyllos</i>            | Germany      | MT587412 | MT592124 | MT592604 | – | – | – | – | – | – |
| <i>Dothiorella symphoricarpicola</i> | CPC 31033       | <i>Elaeagnus rhamnoides</i>          | Germany      | MT587413 | MT592125 | MT592605 | – | – | – | – | – | – |
| <i>Dothiorella symphoricarpicola</i> | CPC 33923       | <i>Acer negundo</i>                  | Germany      | MT587414 | MT592126 | MT592606 | – | – | – | – | – | – |
| <i>Dothiorella symphoricarpicola</i> | MFLUCC 13-0497* | <i>Symphoricarpos</i> sp.            | Italy        | KJ742378 | KJ742381 | –        | – | – | – | – | – | – |
| <i>Dothiorella tectonae</i>          | MFLUCC 18-0382* | <i>Tectona grandis</i>               | Thailand     | KM396899 | KM409637 | KM510357 | – | – | – | – | – | – |
| <i>Dothiorella thailandica</i>       | CBS 133991*     | Dead bamboo culm                     | Thailand     | JX646796 | JX646861 | JX646844 | – | – | – | – | – | – |

|                                      |                              |                                             |              |                 |          |                 |                 |   |                 |                 |   |   |
|--------------------------------------|------------------------------|---------------------------------------------|--------------|-----------------|----------|-----------------|-----------------|---|-----------------|-----------------|---|---|
| <i>Dothiorella thripsita</i>         | CBS 125445* =<br>BRIP 51876a | <i>Acacia harpophylla</i>                   | Australia    | KJ573642        | KJ573639 | KJ577550        | –               | – | –               | –               | – | – |
| <i>Dothiorella ulmacea</i>           | CBS 138855*                  | <i>Eucalyptus</i> sp.                       | Malaysia     | KR611881        | KR611910 | KR611909        | –               | – | –               | –               | – | – |
| <i>Dothiorella ulmacea</i>           | CBS 140005                   | <i>Ulmus laevis</i>                         | Germany      | KR611882        | KR857697 | MT592607        | –               | – | –               | –               | – | – |
| <i>Dothiorella ulmacea</i>           | CBS 141414                   | <i>Corylus avellana</i>                     | Germany      | MT587415        | MT592127 | MT592608        | –               | – | –               | –               | – | – |
| <i>Dothiorella uruguayensis</i>      | CBS 124908*                  | <i>Hexachlamis edulis</i>                   | Uruguay      | EU080923        | EU863180 | KX464886        | –               | – | –               | –               | – | – |
| <i>Dothiorella vidmadera</i>         | CPC 30614                    | <i>Ribes rubrum</i>                         | Germany      | MT587416        | MT592128 | –               | –               | – | –               | –               | – | – |
| <i>Dothiorella vidmadera</i>         | DAR 78992*                   | <i>Vitis vinifera</i>                       | Australia    | EU768874        | EU768881 | HM800522        | –               | – | –               | –               | – | – |
| <i>Dothiorella vinea-gemmae</i>      | CPC 29689                    | <i>Sophora microphylla</i>                  | New Zealand  | MT587417        | MT592129 | MT592609        | –               | – | –               | –               | – | – |
| <i>Dothiorella vinea-gemmae</i>      | DAR 81012*                   | <i>Vitis vinifera</i> cv.<br>Chardonnay     | Australia    | KJ573644        | KJ573641 | KJ577552        | –               | – | –               | –               | – | – |
| <i>Dothiorella viticola</i>          | CBS 112869                   | <i>Vitis vinifera</i> , vine                | South Africa | AY343373        | AY343336 | KX464869        | –               | – | –               | –               | – | – |
| <i>Dothiorella viticola</i>          | CBS 117006                   | <i>Vitis vinifera</i> cv.<br>Garnatxa Negra | Spain        | AY905555        | AY905562 | EU673103        | –               | – | –               | –               | – | – |
| <i>Dothiorella viticola</i>          | CBS 117007                   | <i>Vitis vinifera</i> cv.<br>Macabeu        | Spain        | AY905556        | KX464623 | KX464890        | –               | – | –               | –               | – | – |
| <i>Dothiorella yunnana</i>           | CGMCC 3.17999*               | <i>Camellia</i> sp                          | China        | KX499643        | KX499649 | –               | –               | – | –               | –               | – | – |
| <i>Dothiorella yunnana</i>           | CGMCC 3.18000                | <i>Camellia</i> sp                          | China        | KX499644        | KX499650 | –               | –               | – | –               | –               | – | – |
| <i>Neofusicoccum luteum</i>          | CBS 121482                   | Phaeomoniella<br>chlamydospora              | Spain        | EU650669        | KX464689 | KX464967        | –               | – | –               | –               | – | – |
| <i>Colletotrichum aenigma</i>        | ICMP 18608*                  | <i>Persea americana</i>                     | Israel       | JX010244        | –        | JX010389        | JX009443        | – | JX010044        | JX009774        | – | – |
| <b><i>Colletotrichum aenigma</i></b> | <b>CFCC 55535</b>            | <b><i>Euonymus japonicus</i></b>            | <b>China</b> | <b>OQ344719</b> | –        | <b>OQ410548</b> | <b>OQ410632</b> | – | <b>OQ410568</b> | <b>OQ410558</b> | – | – |
| <i>Colletotrichum aeschynomenes</i>  | ICMP 17673*,<br>ATCC 201874  | <i>Aeschynomene virginica</i>               | USA          | JX010176        | –        | JX010392        | JX009483        | – | JX009930        | JX009799        | – | – |
| <i>Colletotrichum alatae</i>         | CBS 304.67*,<br>ICMP 17919   | <i>Dioscorea alata</i>                      | India        | JX010190        | –        | JX010383        | JX009471        | – | JX009990        | JX009837        | – | – |
| <i>Colletotrichum alienum</i>        | ICMP 12071*                  | <i>Malus domestica</i>                      | New Zealand  | JX010251        | –        | JX010411        | JX009572        | – | JX010028        | JX009882        | – | – |
| <i>Colletotrichum aotearoa</i>       | ICMP 18537*                  | <i>Coprosma</i> sp.                         | New Zealand  | JX010205        | –        | JX010420        | JX009564        | – | JX010005        | JX009853        | – | – |
| <i>Colletotrichum arecicola</i>      | CGMCC 3.19667*               | <i>Areca catechu</i>                        | China        | MK914635        | –        | MK935498        | MK935374        | – | MK935455        | MK935541        | – | – |

|                                          |                                              |                                                    |              |                 |   |                 |                 |   |                 |                 |   |   |
|------------------------------------------|----------------------------------------------|----------------------------------------------------|--------------|-----------------|---|-----------------|-----------------|---|-----------------|-----------------|---|---|
| <i>Colletotrichum<br/>artocarpicola</i>  | MFLUCC 18-<br>1167*                          | <i>Artocarpus<br/>heterophyllus</i>                | Thailand     | MN415991        | – | MN435567        | MN435570        | – | MN435568        | MN435569        | – | – |
| <i>Colletotrichum asianum</i>            | ICMP 18580*,<br>CBS 130418                   | <i>Coffea arabica</i>                              | Thailand     | FJ972612        | – | JX010406        | JX009584        | – | JX010053        | JX009867        | – | – |
| <i>Colletotrichum<br/>australianum</i>   | VPRI 43075*                                  | <i>Citrus sinensis</i>                             | Australia    | MG572138        | – | MG572149        | MN442109        | – | MG572127        | MW091987        | – | – |
| <i>Colletotrichum<br/>camelliae</i>      | CGMCC 3.14925,<br>LC1364*                    | <i>Camellia sinensis</i>                           | China        | KJ955081        | – | KJ955230        | KJ954363        | – | KJ954782        | MZ799255        | – | – |
| <i>Colletotrichum<br/>changpingense</i>  | CGMCC<br>3.17582*, SA0016,<br>MFLUCC 15-0022 | Rhizome of <i>Fragaria<br/>xananass</i>            | China        | KP683152        | – | MZ673952        | KP683093        | – | MZ664048        | KP852449        | – | – |
| <i>Colletotrichum<br/>changpingense</i>  | MFLUCC 18-<br>0945*                          | <i>Magnolia garrettii</i>                          | Thailand     | MW346499        | – | –               | MW655578        | – | MW548592        | MW623653        | – | – |
| <i>Colletotrichum<br/>chrysophilum</i>   | URM 7368, CMM<br>4268*                       | <i>Musa</i> sp.                                    | Brazil       | KX094252        | – | KX094285        | KX093982        | – | KX094183        | KX094083        | – | – |
| <i>Colletotrichum cigarro</i>            | ICMP 18539*                                  | <i>Olea europaea</i>                               | Australia    | JX010230        | – | JX010434        | JX009523        | – | JX009966        | JX009800        | – | – |
| <i>Colletotrichum<br/>clidemiae</i>      | ICMP 18658*                                  | <i>Clidemia hirta</i>                              | USA, Hawaii  | JX010265        | – | JX010438        | JX009537        | – | JX009989        | JX009877        | – | – |
| <i>Colletotrichum<br/>cobbittiense</i>   | BRIP 66219*                                  | <i>Cordyline stricta</i> × <i>C.<br/>australis</i> | Australia    | MH087016        | – | MH094137        | MH094134        | – | MH094133        | MH094135        | – | – |
| <i>Colletotrichum<br/>conoides</i>       | CGMCC 3.17615,<br>CAUG17, LC6226*            | Chili pepper                                       | China        | KP890168        | – | KP890174        | KP890144        | – | KP890162        | KP890156        | – | – |
| <i>Colletotrichum<br/>cordylinicola</i>  | MFLUCC<br>090551*, ICMP 18579                | <i>Cordyline fruticosa</i>                         | Thailand     | JX010226        | – | JX010440        | HM470235        | – | JX009975        | JX009864        | – | – |
| <i>Colletotrichum<br/>dracaenigenum</i>  | MFLUCC 19-<br>0430*                          | <i>Dracaena</i> sp.                                | Thailand     | MN921250        | – | –               | MT313686        | – | MT215577        | MT215575        | – | – |
| <i>Colletotrichum<br/>endophyticum</i>   | MFLUCC 13-<br>0418, LC0324*                  | <i>Pennisetum<br/>purpureum</i>                    | Thailand     | KC633854        | – | MZ67395         | KF306258        | – | KC832854        | MZ799261        | – | – |
| <b><i>Colletotrichum<br/>euonymi</i></b> | <b>CFCC 55540</b>                            | <b><i>Euonymus japonicus</i></b>                   | <b>China</b> | <b>OQ344715</b> | – | <b>OQ410544</b> | <b>OQ410628</b> | – | <b>OQ410564</b> | <b>OQ410554</b> | – | – |
| <b><i>Colletotrichum<br/>euonymi</i></b> | <b>CFCC 55537</b>                            | <b><i>Euonymus japonicus</i></b>                   | <b>China</b> | <b>OQ344716</b> | – | <b>OQ410545</b> | <b>OQ410629</b> | – | <b>OQ410565</b> | <b>OQ410555</b> | – | – |
| <b><i>Colletotrichum<br/>euonymi</i></b> | <b>CFCC 55483</b>                            | <b><i>Euonymus japonicus</i></b>                   | <b>China</b> | <b>OQ344717</b> | – | <b>OQ410546</b> | <b>OQ410630</b> | – | <b>OQ410566</b> | <b>OQ410556</b> | – | – |
| <b><i>Colletotrichum<br/>euonymi</i></b> | <b>CFCC 55542*</b>                           | <b><i>Euonymus japonicus</i></b>                   | <b>China</b> | <b>OQ344718</b> | – | <b>OQ410547</b> | <b>OQ410631</b> | – | <b>OQ410567</b> | <b>OQ410557</b> | – | – |

|                                       |                                          |                              |                |          |   |          |          |   |          |          |   |   |
|---------------------------------------|------------------------------------------|------------------------------|----------------|----------|---|----------|----------|---|----------|----------|---|---|
| <i>Colletotrichum euonymicola</i>     | CFCC 55486*                              | <i>Euonymus japonicus</i>    | China          | OQ344723 | – | OQ410552 | OQ410636 | – | OQ410572 | OQ410562 | – | – |
| <i>Colletotrichum euonymicola</i>     | CFCC 55539                               | <i>Euonymus japonicus</i>    | China          | OQ344724 | – | OQ410553 | OQ410637 | – | OQ410573 | OQ410563 | – | – |
| <i>Colletotrichum fruticola</i>       | ICMP 18581*,<br>CBS 130416               | <i>Coffea arabica</i>        | Thailand       | JX010165 | – | JX010405 | FJ907426 | – | JX010033 | JX009866 | – | – |
| <i>Colletotrichum fructivorum</i>     | Coll1414, CBS<br>133125*                 | <i>Vaccinium macrocarpon</i> | Burlington     | JX145145 | – | JX145196 | MZ664126 | – | MZ664047 | MZ799259 | – | – |
| <i>Colletotrichum gloeosporioides</i> | IMI 356878*, CBS<br>112999               | <i>Citrus sinensis</i>       | Italy          | JX010152 | – | JX010445 | JX009531 | – | JX010056 | JX009818 | – | – |
| <i>Colletotrichum gloeosporioides</i> | CFCC 55544                               | <i>Euonymus japonicus</i>    | China          | OQ344720 | – | OQ410549 | OQ410633 | – | OQ410569 | OQ410559 | – | – |
| <i>Colletotrichum gloeosporioides</i> | CFCC 55545                               | <i>Euonymus japonicus</i>    | China          | OQ344721 | – | OQ410550 | OQ410634 | – | OQ410570 | OQ410560 | – | – |
| <i>Colletotrichum gloeosporioides</i> | CFCC 55547                               | <i>Euonymus japonicus</i>    | China          | OQ344722 | – | OQ410551 | OQ410635 | – | OQ410571 | OQ410561 | – | – |
| <i>Colletotrichum grevilleae</i>      | CBS 132879,<br>CPC 15481*                | <i>Grevillea</i> sp.         | Italy          | KC297078 | – | KC297102 | KC296941 | – | KC297010 | KC296987 | – | – |
| <i>Colletotrichum grossum</i>         | CGMCC3.17614,<br>LC6227*                 | Chili pepper                 | China          | KP890165 | – | KP890171 | KP890141 | – | KP890159 | KP890153 | – | – |
| <i>Colletotrichum hebeiense</i>       | MFLUCC13–<br>0726*                       | <i>Vitis vinifera</i>        | China          | KF156863 | – | KF288975 | KF377532 | – | KF377495 | KF289008 | – | – |
| <i>Colletotrichum hederiicola</i>     | MFLU 15-0689*                            | <i>Hedera helix</i>          | Italy          | MN631384 | – | –        | MN635795 | – | –        | MN635794 | – | – |
| <i>Colletotrichum helleniense</i>     | CBS 142418,<br>CPC 26844*                | <i>Poncirus trifoliata</i>   | Greece, Arta   | KY856446 | – | KY856528 | KY856019 | – | KY856270 | KY856186 | – | – |
| <i>Colletotrichum henanense</i>       | CGMCC 3.17354,<br>LF238 *                | <i>Camellia sinensis</i>     | China          | KJ955109 | – | KJ955257 | KM023257 | – | KJ954810 | MZ799256 | – | – |
| <i>Colletotrichum horii</i>           | NBRC 7478*,<br>ICMP 10492, MTCC<br>10841 | <i>Diospyros kaki</i>        | Japan          | GQ329690 | – | JX010450 | JX009438 | – | GQ329681 | JX009752 | – | – |
| <i>Colletotrichum hystricis</i>       | CBS 142411,<br>CPC 28153*                | <i>Citrus hystrix</i>        | Italy, Catania | KY856450 | – | KY856532 | KY856023 | – | KY856274 | KY856190 | – | – |
| <i>Colletotrichum jiangxiense</i>     | CGMCC<br>3.17361*, LC3266,<br>LF488      | <i>Camellia sinensis</i>     | China          | KJ955149 | – | OK236389 | KJ954427 | – | KJ954850 | MZ799257 | – | – |

|                                           |                                           |                                                 |              |          |   |          |          |   |          |          |   |   |
|-------------------------------------------|-------------------------------------------|-------------------------------------------------|--------------|----------|---|----------|----------|---|----------|----------|---|---|
| <i>Colletotrichum kahawae</i>             | IMI 319418*,<br>ICMP 17816                | <i>Coffea arabica</i>                           | Kenya        | JX010231 | – | JX010444 | JX009452 | – | JX010012 | JX009813 | – | – |
| <i>Colletotrichum makassarens</i>         | CBS 143664*                               | <i>Capsicum annuum</i>                          | Indonesia    | MH728812 | – | MH846563 | MH781480 | – | MH728820 | MH805850 | – | – |
| <i>Colletotrichum musae</i>               | CBS 116870*,<br>ICMP 19119, MTCC<br>11349 | <i>Musa</i> sp.                                 | USA          | JX010146 | – | HQ596280 | JX009433 | – | JX010050 | JX009896 | – | – |
| <i>Colletotrichum nupharicola</i>         | CBS 470.96*,<br>ICMP 18187                | <i>Nuphar lutea</i> subsp.<br><i>polysepala</i> | USA          | JX010187 | – | JX010398 | JX009437 | – | JX009972 | JX009835 | – | – |
| <i>Colletotrichum pandanicola</i>         | MFLUCC 17-<br>0571*                       | <i>Pandanaceae</i>                              | Thailand     | MG646967 | – | MG646926 | MG646938 | – | MG646934 | MG646931 | – | – |
| <i>Colletotrichum perseae</i>             | CBS 141365*,<br>GA100                     | Avocado                                         | Israel       | KX620308 | – | KX620341 | KX620145 | – | KX620242 | MZ799260 | – | – |
| <i>Colletotrichum proteae</i>             | CBS 132882*,<br>CPC 14859                 | <i>Protea</i> sp.                               | South Africa | KC297079 | – | KC297101 | KC296940 | – | KC297009 | KC296986 | – | – |
| <i>Colletotrichum pseudotheobromicola</i> | MFLUCC 18–<br>1602*                       | <i>Prunus avium</i>                             | China        | MH817395 | – | MH853684 | MH853681 | – | MH853675 | MH853678 | – | – |
| <i>Colletotrichum psidii</i>              | CBS 145.29*,<br>ICMP 19120                | <i>Psidium</i> sp.                              | Italy        | JX010219 | – | JX010443 | JX009515 | – | JX009967 | JX009901 | – | – |
| <i>Colletotrichum queenslandicum</i>      | ICMP 1778*                                | <i>Carica papaya</i>                            | Australia    | JX010276 | – | JX010414 | JX009447 | – | JX009934 | JX009899 | – | – |
| <i>Colletotrichum rhexiae</i>             | Coll1026, BPI<br>884112, CBS 133134*      | <i>Rhexia virginica</i>                         | Sussex       | JX145128 | – | JX145179 | MZ664127 | – | MZ664046 | MZ799258 | – | – |
| <i>Colletotrichum salsolae</i>            | ICMP 19051*                               | <i>Salsola tragus</i>                           | Hungary      | JX010242 | – | JX010403 | JX009562 | – | JX009916 | JX009863 | – | – |
| <i>Colletotrichum siamense</i>            | ICMP 18578*,<br>CBS 130417                | <i>Coffea arabica</i>                           | Thailand     | JX010171 | – | JX010404 | FJ907423 | – | JX009924 | JX009865 | – | – |
| <i>Colletotrichum syzygiicola</i>         | DNCL021,<br>MFLUCC 10-0624*               | <i>Syzygium samarangense</i>                    | Thailand     | KF242094 | – | KF254880 | KF157801 | – | KF242156 | –        | – | – |
| <i>Colletotrichum tainanense</i>          | CBS 143666*                               | <i>Capsicum annuum</i>                          | Taiwan       | MH728818 | – | MH846558 | MH781475 | – | MH728823 | MH805845 | – | – |
| <i>Colletotrichum temperatum</i>          | CBS 133122*,<br>BPI 884100                | <i>Vaccinium macrocarpon</i>                    | Bronx        | JX145159 | – | JX145211 | MZ664125 | – | MZ664045 | MZ799254 | – | – |
| <i>Colletotrichum theobromicola</i>       | CBS 124945*,<br>ICMP 18649                | <i>Theobroma cacao</i>                          | Panama       | JX010294 | – | JX010447 | JX009444 | – | JX010006 | JX009869 | – | – |
| <i>Colletotrichum ti</i>                  | ICMP 4832*                                | <i>Cordyline</i> sp.                            | New Zealand  | JX010269 | – | JX010442 | JX009520 | – | JX009952 | JX009898 | – | – |

|  |                                                 |                                           |                                                       |                   |                 |                 |                 |                 |                 |          |          |   |   |
|--|-------------------------------------------------|-------------------------------------------|-------------------------------------------------------|-------------------|-----------------|-----------------|-----------------|-----------------|-----------------|----------|----------|---|---|
|  | CBS 124949*,<br><i>Colletotrichum tropicale</i> | ICMP 18653, MTCC<br>11371                 | <i>Theobroma cacao</i>                                | Panama            | JX010264        | –               | JX010407        | JX009489        | –               | JX010007 | JX009870 | – | – |
|  | <i>Colletotrichum<br/>viniferum</i>             | GZAAS 5.08601*,<br>yg1                    | <i>Vitis vinifera</i> cv.<br>Shuijing                 | China             | JN412804        | –               | –               | JN412795        | –               | JN412798 | –        | – | – |
|  | <i>Colletotrichum<br/>wuxiense</i>              | CGMCC 3.17894*                            | <i>Camellia sinensis</i>                              | China             | KU251591        | –               | KU252200        | KU251672        | –               | KU252045 | KU251939 | – | – |
|  | <i>Colletotrichum<br/>xanthorrhoeae</i>         | BRIP 45094*,<br>ICMP 17903, CBS<br>127831 | <i>Xanthorrhoea preissii</i>                          | Australia         | JX010261        | –               | JX010448        | JX009478        | –               | JX009927 | JX009823 | – | – |
|  | <i>Colletotrichum<br/>xishuangbannaense</i>     | MFLUCC 19-<br>0107*                       | <i>Magnolia liliifera</i>                             | China             | MW346469        | –               | –               | MW652294        | –               | MW537586 | MW660832 | – | – |
|  | <i>Colletotrichum<br/>yulongense</i>            | CFCC 50818*                               | <i>Vaccinium dunalianum</i><br>var. <i>urophyllum</i> | China             | MH751507        | –               | MK108987        | MH777394        | –               | MK108986 | MH793605 | – | – |
|  | <i>Colletotrichum<br/>vietnamense</i>           | CBS 125477,<br>BMT25(L3)                  | <i>Coffea</i> sp.                                     | Vietnam           | KF687720        | –               | KF687876        | KF687791        | –               | KF687831 | KF687768 | – | – |
|  | <i>Colletotrichum<br/>vietnamense</i>           | CBS 125478,<br>LD16(L2)*                  | <i>Coffea</i> sp.                                     | Vietnam           | KF687721        | –               | KF687877        | KF687792        | –               | KF687832 | KF687769 | – | – |
|  | <i>Cytospora ailanthicola</i>                   | CFCC 89970                                | <i>Ailanthus altissima</i>                            | Ningxia,<br>China | MH933618        | MH933494        | MH933565        | MH933526        | MH933592        | –        | –        | – | – |
|  | <b><i>Cytospora<br/>ailanthicola</i></b>        | <b>CFCC 55529</b>                         | <b><i>Euonymus japonicus</i></b>                      | <b>China</b>      | <b>OQ344725</b> | <b>OQ398738</b> | <b>OQ398765</b> | <b>OQ410598</b> | <b>OQ398712</b> | –        | –        | – | – |
|  | <i>Cytospora albodisca</i>                      | CFCC 53161                                | <i>Platycladus orientalis</i>                         | Beijing,<br>China | MW418406        | MW422921        | MW422933        | MW422899        | MW422909        | –        | –        | – | – |
|  | <i>Cytospora albodisca</i>                      | CFCC 54373                                | <i>Platycladus orientalis</i>                         | Beijing,<br>China | MW418407        | MW422922        | MW422934        | MW422900        | MW422910        | –        | –        | – | – |
|  | <b><i>Cytospora albodisca</i></b>               | <b>CFCC 56274</b>                         | <b><i>Euonymus japonicus</i></b>                      | <b>China</b>      | <b>OQ344726</b> |                 | <b>OQ398766</b> | <b>OQ410599</b> |                 | –        | –        | – | – |
|  | <b><i>Cytospora albodisca</i></b>               | <b>CFCC 57538</b>                         | <b><i>Euonymus japonicus</i></b>                      | <b>China</b>      | <b>OQ344727</b> |                 | <b>OQ398767</b> | <b>OQ410600</b> |                 | –        | –        | – | – |
|  | <i>Cytospora alba</i>                           | CFCC 55462*                               | <i>Salix matsudana</i>                                | Gansu,<br>China   | MZ702593        | OK303577        | OK303644        | OK303457        | OK303516        | –        | –        | – | – |
|  | <i>Cytospora alba</i>                           | CFCC 55463*                               | <i>Salix matsudana</i>                                | Gansu,<br>China   | MZ702594        | OK303578        | OK303645        | OK303458        | OK303517        | –        | –        | – | – |
|  | <i>Cytospora<br/>ampulliformis</i>              | MFLUCC 16-<br>0583*                       | <i>Sorbus intermedia</i>                              | Russia            | KY417726        | –               | –               | KY417692        | KY417794        | –        | –        | – | – |
|  | <i>Cytospora<br/>ampulliformis</i>              | MFLUCC 16-<br>0629                        | <i>Acer platanoides</i>                               | Russia            | KY417727        | –               | –               | KY417693        | KY417795        | –        | –        | – | – |

|                                   |                     |                             |                          |          |          |          |          |          |   |   |   |   |
|-----------------------------------|---------------------|-----------------------------|--------------------------|----------|----------|----------|----------|----------|---|---|---|---|
| <i>Cytospora amygdali</i>         | CBS 144233*         | <i>Prunus dulcis</i>        | California,<br>USA       | MG971853 | MG971659 | MG971718 | MG972002 | –        | – | – | – | – |
| <i>Cytospora atrocirrhata</i>     | CFCC 89615          | <i>Juglans regia</i>        | Qinghai,<br>China        | KR045618 | KP310858 | KR045659 | KF498673 | KU710946 | – | – | – | – |
| <i>Cytospora atrocirrhata</i>     | CFCC 89616          | <i>Juglans regia</i>        | Qinghai,<br>China        | KR045619 | KP310859 | KR045660 | KF498674 | KU710947 | – | – | – | – |
| <i>Cytospora atrocirrhata</i>     | CXY 1401            | <i>Populus</i> sp.          | Inner<br>Mongolia, China | JX534242 | –        | KM034904 | –        | –        | – | – | – | – |
| <i>Cytospora atrocirrhata</i>     | CXY 1402            | <i>Populus</i> sp.          | Inner<br>Mongolia, China | JX534243 | –        | KM034903 | –        | –        | – | – | – | – |
| <i>Cytospora beilinensis</i>      | CFCC 50493*         | <i>Pinus armandii</i>       | Beijing,<br>China        | MH933619 | MH933495 | MH933561 | MH933527 | –        | – | – | – | – |
| <i>Cytospora beilinensis</i>      | CFCC 50494          | <i>Pinus armandii</i>       | Beijing,<br>China        | MH933620 | MH933496 | MH933562 | MH933528 | –        | – | – | – | – |
| <i>Cytospora berberidis</i>       | CFCC 89927*         | <i>Berberis dasystachya</i> | Qinghai,<br>China        | KR045620 | KU710913 | KR045661 | KU710990 | KU710948 | – | – | – | – |
| <i>Cytospora berberidis</i>       | CFCC 89933          | <i>Berberis dasystachya</i> | Qinghai,<br>China        | KR045621 | KU710914 | KR045662 | KU710991 | KU710949 | – | – | – | – |
| <i>Cytospora bungeana</i>         | CFCC 50495*         | <i>Pinus bungeana</i>       | Shanxi,<br>China         | MH933621 | MH933497 | MH933563 | MH933529 | MH933593 | – | – | – | – |
| <i>Cytospora bungeana</i>         | CFCC 50496          | <i>Pinus bungeana</i>       | Shanxi,<br>China         | MH933622 | MH933498 | MH933564 | MH933530 | MH933594 | – | – | – | – |
| <i>Cytospora californica</i>      | CBS 144234*         | <i>Juglans regia</i>        | California,<br>USA       | MG971935 | MG971645 | –        | MG972083 | –        | – | – | – | – |
| <i>Cytospora carbonacea</i>       | CFCC 89947          | <i>Ulmus pumila</i>         | Qinghai,<br>China        | KR045622 | KP310855 | KP310825 | KP310842 | KU710950 | – | – | – | – |
| <i>Cytospora carpobroti</i>       | CMW 48981*          | <i>Carpobrotus edulis</i>   | South Africa             | MH382812 | MH411212 | MH411207 | –        | –        | – | – | – | – |
| <i>Cytospora celtidicola</i>      | CFCC 50497*         | <i>Celtis sinensis</i>      | Anhui, China             | MH933623 | MH933499 | MH933566 | MH933531 | MH933595 | – | – | – | – |
| <i>Cytospora celtidicola</i>      | CFCC 50498          | <i>Celtis sinensis</i>      | Anhui, China             | MH933624 | MH933500 | MH933567 | MH933532 | MH933596 | – | – | – | – |
| <i>Cytospora centrivillosa</i>    | MFLUCC 16-<br>1206* | <i>Sorbus domestica</i>     | Italy                    | MF190122 | –        | –        | –        | MF377600 | – | – | – | – |
| <i>Cytospora centrivillosa</i>    | MFLUCC 17-<br>1660  | <i>Sorbus domestica</i>     | Italy                    | MF190123 | –        | –        | –        | MF377601 | – | – | – | – |
| <i>Cytospora<br/>ceratosperma</i> | CFCC 89624          | <i>Juglans regia</i>        | Gansu,<br>China          | KR045645 | KP310860 | KR045686 | –        | KU710976 | – | – | – | – |

|                                   |                 |                             |                 |          |          |          |          |          |   |   |   |   |
|-----------------------------------|-----------------|-----------------------------|-----------------|----------|----------|----------|----------|----------|---|---|---|---|
| <i>Cytospora ceratosperma</i>     | CFCC 89625      | <i>Juglans regia</i>        | Gansu, China    | KR045646 | KP31086  | KR045687 | –        | KU710977 | – | – | – | – |
| <i>Cytospora ceratospermopsis</i> | CFCC 89626*     | <i>Juglans regia</i>        | Shaanxi, China  | KR045647 | KU710934 | KR045688 | KU711011 | KU710978 | – | – | – | – |
| <i>Cytospora ceratospermopsis</i> | CFCC 89627      | <i>Juglans regia</i>        | Shaanxi, China  | KR045648 | KU710935 | KR045689 | KU711012 | KU710979 | – | – | – | – |
| <i>Cytospora chrysosperma</i>     | CFCC 89629      | <i>Salix psammophila</i>    | Shaanxi, China  | KF765673 | –        | –        | –        | KF765705 | – | – | – | – |
| <i>Cytospora chrysosperma</i>     | CFCC 89981      | <i>Populus alba</i> subsp.  | Gansu, China    | MH933625 | MH933501 | MH933568 | MH933533 | MH933597 | – | – | – | – |
|                                   |                 | <i>pyramidalis</i>          |                 |          |          |          |          |          | – | – | – | – |
| <i>Cytospora chrysosperma</i>     | CFCC 89982      | <i>Ulmus pumila</i>         | Tibet, China    | KP281261 | KP310848 | KP310818 | KP310835 | –        | – | – | – | – |
| <i>Cytospora cinnamomea</i>       | CFCC 53178*     | <i>Prunus armeniaca</i>     | Xinjiang, China | MK673054 | –        | MK672970 | MK673024 | –        | – | – | – | – |
| <i>Cytospora coryli</i>           | CFCC 53162*     | <i>Corylus mandshurica</i>  | Beijing, China  | MN854450 | MN850758 | MN861120 | –        | MN850751 | – | – | – | – |
| <i>Cytospora corylina</i>         | CFCC 54684*     | <i>Corylus heterophylla</i> | Beijing, China  | MW839861 | MW815886 | MW883969 | MW815951 | MW815937 | – | – | – | – |
| <i>Cytospora corylina</i>         | CFCC 54685      | <i>Corylus heterophylla</i> | Beijing, China  | MW839862 | MW815887 | MW883970 | MW815952 | MW815938 | – | – | – | – |
| <i>Cytospora corylina</i>         | CFCC 54686      | <i>Corylus heterophylla</i> | Beijing, China  | MW839863 | MW815888 | MW883971 | MW815953 | MW815939 | – | – | – | – |
| <i>Cytospora corylina</i>         | CFCC 54687      | <i>Corylus heterophylla</i> | Beijing, China  | MW839864 | MW815889 | MW883972 | MW815954 | MW815940 | – | – | – | – |
| <i>Cytospora cotini</i>           | MFLUCC 14-1050* | <i>Cotinus coggygria</i>    | Russia          | KX430142 | –        | –        | –        | KX430144 | – | – | – | – |
| <i>Cytospora cotoneastricola</i>  | CF 20197027     | <i>Cotoneaster</i> sp.      | Tibet, China    | MK673072 | MK672958 | MK672988 | MK673042 | MK673012 | – | – | – | – |
| <i>Cytospora cotoneastricola</i>  | CF 20197028     | <i>Cotoneaster</i> sp.      | Tibet, China    | MK673073 | MK672959 | MK672989 | MK673043 | MK673013 | – | – | – | – |
| <i>Cytospora cotoneastricola</i>  | CF 20197030     | <i>Cotoneaster</i> sp.      | Tibet, China    | MK673074 | MK672960 | MK672990 | MK673044 | MK673014 | – | – | – | – |
| <i>Cytospora cotoneastricola</i>  | CF 20197031*    | <i>Cotoneaster</i> sp.      | Tibet, China    | MK673075 | MK672961 | MK672991 | MK673045 | MK673015 | – | – | – | – |
| <i>Cytospora curvata</i>          | MFLUCC 15-0865* | <i>Salix alba</i>           | Russia          | KY417728 | –        | –        | KY417694 | KY417796 | – | – | – | – |

|                                     |                     |                                                |                             |                 |                 |                 |                 |                 |   |   |   |   |
|-------------------------------------|---------------------|------------------------------------------------|-----------------------------|-----------------|-----------------|-----------------|-----------------|-----------------|---|---|---|---|
| <i>Cytospora curvispora</i>         | CFCC 54000*         | <i>Corylus heterophylla</i>                    | Beijing,<br>China           | MW839851        | MW815880        | MW883963        | MW815931        | MW815945        | – | – | – | – |
| <i>Cytospora curvispora</i>         | CFCC 54001          | <i>Corylus heterophylla</i>                    | Beijing,<br>China           | MW839853        | MW815881        | MW883964        | MW815932        | MW815946        | – | – | – | – |
| <i>Cytospora curvispora</i>         | CFCC 54676          | <i>Corylus heterophylla</i>                    | Beijing,<br>China           | MW839854        | MW815882        | MW883965        | MW815933        | MW815947        | – | – | – | – |
| <i>Cytospora curvispora</i>         | CFCC 54677          | <i>Corylus heterophylla</i>                    | Beijing,<br>China           | MW839855        | MW815883        | MW883966        | MW815934        | MW815948        | – | – | – | – |
| <i>Cytospora curvispora</i>         | CFCC 54678          | <i>Corylus heterophylla</i>                    | Beijing,<br>China           | MW839856        | MW815884        | MW883967        | MW815935        | MW815949        | – | – | – | – |
| <i>Cytospora curvispora</i>         | CFCC 54679          | <i>Corylus heterophylla</i>                    | Beijing,<br>China           | MW839857        | MW815885        | MW883968        | MW815936        | MW815950        | – | – | – | – |
| <i>Cytospora davidiana</i>          | CXY 1350*           | <i>Populus davidiana</i>                       | Inner<br>Mongolia,<br>China | KM034870        | –               | –               | –               | –               | – | – | – | – |
| <i>Cytospora diopuiensis</i>        | CFCC 55884          | <i>Kerria japonica</i> f.<br><i>pleniflora</i> | China                       | OK316819        | OK358471        | OK358473        | –               | OK358569        | – | – | – | – |
| <i>Cytospora diopuiensis</i>        | CFCC 55885          | <i>Kerria japonica</i> f.<br><i>pleniflora</i> | China                       | OK316820        | OK358472        | OK358474        | –               | OK358470        | – | – | – | – |
| <i>Cytospora diopuiensis</i>        | MFLUCC 18-<br>1419* | Undefined wood                                 | Thailand                    | MK912137        | –               | –               | MN685819        | –               | – | – | – | – |
| <b><i>Cytospora diopuiensis</i></b> | <b>CFCC 54692</b>   | <b><i>Euonymus japonicus</i></b>               | <b>China</b>                | <b>OQ344752</b> | –               | –               | –               | –               | – | – | – | – |
| <b><i>Cytospora diopuiensis</i></b> | <b>CFCC 55479</b>   | <b><i>Euonymus japonicus</i></b>               | <b>China</b>                | <b>OQ344753</b> | <b>OQ398762</b> | <b>OQ398791</b> | <b>OQ410625</b> | <b>OQ398735</b> | – | – | – | – |
| <b><i>Cytospora diopuiensis</i></b> | <b>CFCC 55527</b>   | <b><i>Euonymus japonicus</i></b>               | <b>China</b>                | <b>OQ344754</b> | <b>OQ398763</b> | <b>OQ398792</b> | <b>OQ410626</b> | <b>OQ398736</b> | – | – | – | – |
| <b><i>Cytospora diopuiensis</i></b> | <b>CFCC 55528</b>   | <b><i>Euonymus japonicus</i></b>               | <b>China</b>                | <b>OQ344755</b> | <b>OQ398764</b> | <b>OQ398793</b> | <b>OQ410627</b> | <b>OQ398737</b> | – | – | – | – |
| <i>Cytospora discotoma</i>          | CFCC 53137 *        | <i>Platycladus orientalis</i>                  | Beijing,<br>China           | MW418404        | MW422919        | MW422931        | MW422897        | MW422907        | – | – | – | – |
| <i>Cytospora discotoma</i>          | CFCC 54368          | <i>Platycladus orientalis</i>                  | Beijing,<br>China           | MW418405        | MW422920        | MW422932        | MW422898        | MW422908        | – | – | – | – |
| <b><i>Cytospora discotoma</i></b>   | <b>CFCC 56276</b>   | <b><i>Euonymus japonicus</i></b>               | <b>China</b>                | <b>OQ344728</b> | <b>OQ398739</b> | –               | <b>OQ410601</b> | <b>OQ398713</b> | – | – | – | – |
| <i>Cytospora donetzica</i>          | MFLUCC 15-<br>0864  | <i>Crataegus monogyna</i>                      | Russia                      | KY417729        | –               | –               | KY417695        | KY417797        | – | – | – | – |

|                                  |                   |                                  |                 |                 |                 |                 |                 |                 |   |   |   |   |
|----------------------------------|-------------------|----------------------------------|-----------------|-----------------|-----------------|-----------------|-----------------|-----------------|---|---|---|---|
| <i>Cytospora donetzica</i>       | MFLUCC 16-0574*   | <i>Crataegus monogyna</i>        | Russia          | KY417731        | –               | –               | KY417697        | KY417799        | – | – | – | – |
| <i>Cytospora donglingensis</i>   | CFCC 53159 *      | <i>Platycladus orientalis</i>    | Beijing, China  | MW418412        | MW422927        | MW422939        | MW422903        | MW422915        | – | – | – | – |
| <i>Cytospora donglingensis</i>   | CFCC 53160        | <i>Platycladus orientalis</i>    | Beijing, China  | MW418414        | MW422929        | MW422941        | MW422905        | MW422917        | – | – | – | – |
| <i>Cytospora donglingensis</i>   | CFCC 54371        | <i>Platycladus orientalis</i>    | Beijing, China  | MW418413        | MW422928        | MW422940        | MW422904        | MW422916        | – | – | – | – |
| <i>Cytospora donglingensis</i>   | CFCC 54372        | <i>Platycladus orientalis</i>    | Beijing, China  | MW418415        | MW422930        | MW422942        | MW422906        | MW422918        | – | – | – | – |
| <i>Cytospora elaeagni</i>        | CFCC 89632        | <i>Elaeagnus angustifolia</i>    | Ningxia, China  | KR045626        | KU710918        | KR045667        | KU710995        | KU710955        | – | – | – | – |
| <i>Cytospora elaeagni</i>        | CFCC 89633        | <i>Elaeagnus angustifolia</i>    | Ningxia, China  | KF765677        | KU710919        | KR045668        | KU710996        | KU710956        | – | – | – | – |
| <b><i>Cytospora elaeagni</i></b> | <b>CFCC 54082</b> | <b><i>Euonymus japonicus</i></b> | <b>China</b>    | <b>OQ344729</b> | <b>OQ398740</b> | <b>OQ398768</b> | <b>OQ410602</b> | <b>OQ398714</b> | – | – | – | – |
| <b><i>Cytospora elaeagni</i></b> | <b>CFCC 55477</b> | <b><i>Euonymus japonicus</i></b> | <b>China</b>    | <b>OQ344730</b> | <b>OQ398741</b> | <b>OQ398769</b> | <b>OQ410603</b> | <b>OQ398715</b> | – | – | – | – |
| <b><i>Cytospora elaeagni</i></b> | <b>CFCC 55526</b> | <b><i>Euonymus japonicus</i></b> | <b>China</b>    | <b>OQ344731</b> | <b>OQ398742</b> | <b>OQ398770</b> | <b>OQ410604</b> | <b>OQ398716</b> | – | – | – | – |
| <b><i>Cytospora elaeagni</i></b> | <b>CFCC 56273</b> | <b><i>Euonymus japonicus</i></b> | <b>China</b>    | <b>OQ344732</b> | <b>OQ398743</b> | <b>OQ398771</b> | <b>OQ410605</b> | <b>OQ398717</b> | – | – | – | – |
| <b><i>Cytospora elaeagni</i></b> | <b>CFCC 56287</b> | <b><i>Euonymus japonicus</i></b> | <b>China</b>    | <b>OQ344733</b> | <b>OQ398744</b> | <b>OQ398772</b> | <b>OQ410606</b> | <b>OQ398718</b> | – | – | – | – |
| <i>Cytospora elaeagnicola</i>    | CFCC 52882*       | <i>Elaeagnus angustifolia</i>    | China           | MK732341        | –               | –               | MK732344        | MK732347        | – | – | – | – |
| <i>Cytospora elaeagnicola</i>    | CFCC 52883        | <i>Elaeagnus angustifolia</i>    | China           | MK732342        | –               | –               | MK732345        | MK732348        | – | – | – | – |
| <i>Cytospora elaeagnicola</i>    | CFCC 52884        | <i>Elaeagnus angustifolia</i>    | China           | MK732343        | –               | –               | MK732346        | MK732349        | – | – | – | – |
| <i>Cytospora erumpens</i>        | CFCC 50022        | <i>Prunus padus</i>              | Shanxi, China   | MH933627        | MH933502        | MH933569        | MH933534        | –               | – | – | – | – |
| <i>Cytospora erumpens</i>        | MFLUCC 16-0580*   | <i>Salix × fragilis</i>          | Russia          | KY417733        | –               | –               | KY417699        | KY417801        | – | – | – | – |
| <i>Cytospora erumpens</i>        | CFCC 53163        | <i>Prunus padus</i>              | Xinjiang, China | MK673059        | MK672948        | MK672975        | MK673029        | MK673000        | – | – | – | – |
| <i>Cytospora eucalypti</i>       | CBS 144241        | <i>Eucalyptus globulus</i>       | California, USA | MG971907        | MG971617        | MG971772        | MG972056        | –               | – | – | – | – |
| <i>Cytospora euonymicola</i>     | CFCC 50499*       | <i>Euonymus kiautschovicus</i>   | Shaanxi, China  | MH933628        | MH933503        | MH933570        | MH933535        | MH933598        | – | – | – | – |
| <i>Cytospora euonymicola</i>     | CFCC 50500        | <i>Euonymus kiautschovicus</i>   | Shaanxi, China  | MH933629        | MH933504        | MH933571        | MH933536        | MH933599        | – | – | – | – |

|                               |                 |                                |                     |          |          |          |           |          |   |   |   |   |
|-------------------------------|-----------------|--------------------------------|---------------------|----------|----------|----------|-----------|----------|---|---|---|---|
| <i>Cytospora euonymicola</i>  | CFCC 54688      | <i>Euonymus japonicus</i>      | China               | OQ344734 | OQ398745 | OQ398773 | OQ410607  | OQ398719 | – | – | – | – |
| <i>Cytospora euonymicola</i>  | CFCC 55530      | <i>Euonymus japonicus</i>      | China               | OQ344735 | OQ398746 | OQ398774 | OQ410608  | OQ398720 | – | – | – | – |
| <i>Cytospora euonymina</i>    | CFCC 89993*     | <i>Euonymus kiautschovicus</i> | Shanxi, China       | MH933630 | MH933505 | MH933590 | MH933537  | MH933600 | – | – | – | – |
| <i>Cytospora euonymina</i>    | CFCC 89999      | <i>Euonymus kiautschovicus</i> | Shanxi, China       | MH933631 | MH933506 | MH933591 | MH933538  | MH933601 | – | – | – | – |
| <i>Cytospora euonymina</i>    | CFCC 55524      | <i>Euonymus japonicus</i>      | China               | OQ344736 | OQ398747 | OQ398775 | OQ410609  | –        | – | – | – | – |
| <i>Cytospora euonymina</i>    | CFCC 55525      | <i>Euonymus japonicus</i>      | China               | OQ344737 | OQ398748 | OQ398776 | OQ410610  | OQ398721 | – | – | – | – |
| <i>Cytospora fraxinigena</i>  | BBH 42442       | <i>Fraxinus ornus</i>          | NA                  | MF190133 | –        | –        | –         | –        | – | – | – | – |
| <i>Cytospora fraxinigena</i>  | MFLUCC 14-0868* | <i>Fraxinus ornus</i>          | Italy               | MF190133 | –        | –        | –         | –        | – | – | – | – |
| <i>Cytospora fugax</i>        | CXY 1371        | <i>Populus simonii</i>         | Jilin, China        | KM034852 | –        | KM034891 | –         | –        | – | – | – | – |
| <i>Cytospora fugax</i>        | CXY 1381        | <i>Populus ussuriensis</i>     | Heilongjiang, China | KM034853 | –        | KM034890 | –         | –        | – | – | – | – |
| <i>Cytospora fusispora</i>    | NFCCI 4372      | NA                             | India               | MN227694 | –        | –        | –         | –        | – | – | – | – |
| <i>Cytospora galegicola</i>   | MFLUCC 18-1199* | <i>Galega officinalis</i>      | Forlì-Cesena, Italy | MK912128 | –        | –        | MN685810  | MN685820 | – | – | – | – |
| <i>Cytospora gigalocus</i>    | CFCC 89620*     | <i>Juglans regia</i>           | Qinghai, China      | KR045628 | KU710920 | KR045669 | KU710997  | KU710957 | – | – | – | – |
| <i>Cytospora gigalocus</i>    | CFCC 89621      | <i>Juglans regia</i>           | Qinghai, China      | KR045629 | KU710921 | KR045670 | KU710998  | KU710958 | – | – | – | – |
| <i>Cytospora gigaspora</i>    | CFCC 50014      | <i>Juniperus procumbens</i>    | Shanxi, China       | KR045630 | KU710922 | KR045671 | KU710999. | KU710959 | – | – | – | – |
| <i>Cytospora gigaspora</i>    | CFCC 89634*     | <i>Salix psammophila</i>       | Shaanxi, China      | KF765671 | KU710923 | KR045672 | KU711000  | KU710960 | – | – | – | – |
| <i>Cytospora globosa</i>      | MFLU 16-2054*   | <i>Abies alba</i>              | Italy               | MT177935 | MT454016 | –        | –         | MT432212 | – | – | – | – |
| <i>Cytospora granati</i>      | CBS 144237*     | <i>Punica granatum</i>         | California, USA     | MG971799 | MG971514 | MG971664 | MG971949  | –        | – | – | – | – |
| <i>Cytospora haidianensis</i> | CFCC 54056      | <i>Euonymus alatus</i>         | Beijing, China      | MT360041 | MT363997 | MT364007 | MT363978  | MT363987 | – | – | – | – |
| <i>Cytospora haidianensis</i> | CFCC 54057*     | <i>Euonymus alatus</i>         | Beijing, China      | MT360042 | MT363998 | MT364008 | MT363979  | MT363988 | – | – | – | – |

|                                      |                   |                                  |                     |                 |                 |                 |                 |                 |   |   |   |   |
|--------------------------------------|-------------------|----------------------------------|---------------------|-----------------|-----------------|-----------------|-----------------|-----------------|---|---|---|---|
| <i>Cytospora haidianensis</i>        | CFCC 54184        | <i>Euonymus alatus</i>           | Beijing,<br>China   | MT360043        | MT363999        | MT364009        | MT363980        | MT363989        | – | – | – | – |
| <b><i>Cytospora haidianensis</i></b> | <b>CFCC 55480</b> | <b><i>Euonymus japonicus</i></b> | <b>China</b>        | <b>OQ344738</b> | <b>OQ398749</b> | <b>OQ398777</b> | <b>OQ410611</b> | <b>OQ398722</b> | – | – | – | – |
| <b><i>Cytospora haidianensis</i></b> | <b>CFCC 55531</b> | <b><i>Euonymus japonicus</i></b> | <b>China</b>        | <b>OQ344739</b> | <b>OQ398750</b> | <b>OQ398778</b> | <b>OQ410612</b> | <b>OQ398723</b> | – | – | – | – |
| <b><i>Cytospora haidianensis</i></b> | <b>CFCC 55532</b> | <b><i>Euonymus japonicus</i></b> | <b>China</b>        | <b>OQ344740</b> | <b>OQ398751</b> | <b>OQ398779</b> | <b>OQ410613</b> | <b>OQ398724</b> | – | – | – | – |
| <b><i>Cytospora haidianensis</i></b> | <b>CFCC 55533</b> | <b><i>Euonymus japonicus</i></b> | <b>China</b>        | <b>OQ344741</b> | <b>OQ398752</b> | <b>OQ398780</b> | <b>OQ410614</b> | <b>OQ398725</b> | – | – | – | – |
| <i>Cytospora hippophaës</i>          | CFCC 89639        | <i>Hippophaë rhamnoides</i>      | Gansu,<br>China     | KR045632        | KU710924        | KR045673        | KU711001        | KU710961        | – | – | – | – |
| <i>Cytospora hippophaës</i>          | CFCC 89640        | <i>Hippophaë rhamnoides</i>      | Gansu,<br>China     | KF765682        | KP310865        | KR045674        | KF765730        | KU710962        | – | – | – | – |
| <i>Cytospora japonica</i>            | CFCC 89956        | <i>Prunus cerasifera</i>         | Ningxia,<br>China   | KR045624        | KU710916        | KR045665        | KU710993        | KU710953        | – | – | – | – |
| <i>Cytospora japonica</i>            | CFCC 89960        | <i>Prunus cerasifera</i>         | Ningxia,<br>China   | KR045625        | KU710917        | KR045666        | KU710994        | KU710954        | – | – | – | – |
| <i>Cytospora joaquinensis</i>        | CBS 144235        | <i>Populus deltoides</i>         | California,<br>USA  | MG971895        | MG971605        | MG971761        | MG972044        | –               | – | – | – | – |
| <i>Cytospora junipericola</i>        | BBH 42444         | <i>Juniperus communis</i>        | Italy               | MF190126        | MF377579        | –               | –               | –               | – | – | – | – |
| <i>Cytospora junipericola</i>        | MFLU 17-0882*     | <i>Juniperus communis</i>        | Italy               | MF190125        | MF377580        | –               | –               | –               | – | – | – | – |
| <i>Cytospora juniperina</i>          | CFCC 50501*       | <i>Juniperus przewalskii</i>     | Sichuan,<br>China   | MH933632        | MH933507        | –               | MH933539        | MH933602        | – | – | – | – |
| <i>Cytospora juniperina</i>          | CFCC 50502        | <i>Juniperus przewalskii</i>     | Sichuan,<br>China   | MH933633        | MH933508        | MH933572        | MH933540        | MH933603        | – | – | – | – |
| <i>Cytospora juniperina</i>          | CFCC 50503        | <i>Juniperus przewalskii</i>     | Sichuan,<br>China   | MH933634        | MH933509        | –               | MH933541        | MH933604        | – | – | – | – |
| <i>Cytospora kantschavelii</i>       | CXY 1383          | <i>Populus maximowiczii</i>      | Jilin, China        | KM034867        | –               | –               | –               | –               | – | – | – | – |
| <i>Cytospora kantschavelii</i>       | CXY 1386          | <i>Populus maximowiczii</i>      | Chongqing,<br>China | KM034867        | –               | –               | –               | –               | – | – | – | – |
| <i>Cytospora kuanchengensis</i>      | CFCC 52464*       | <i>Castanea mollissima</i>       | China               | MK432616        | –               | –               | MK442940        | MK578076        | – | – | – | – |
| <i>Cytospora kuanchengensis</i>      | CFCC 52465        | <i>Castanea mollissima</i>       | China               | MK432617        | –               | –               | MK442941        | MK578077        | – | – | – | – |
| <i>Cytospora longispora</i>          | CBS 144236*       | <i>Prunus domestica</i>          | California,<br>USA  | MG971905        | MG971615        | MG971764        | MG972054        | –               | – | – | – | – |
| <i>Cytospora longistiolata</i>       | MFLUCC 16-0628    | <i>Salix × fragilis</i>          | Russia              | KY417734        | –               | –               | KY417700        | KY417802        | – | – | – | – |

|                                    |                   |                                  |                    |                 |                 |                 |                 |                 |   |   |   |   |
|------------------------------------|-------------------|----------------------------------|--------------------|-----------------|-----------------|-----------------|-----------------|-----------------|---|---|---|---|
| <i>Cytospora leucosperma</i>       | CFCC 89622        | <i>Pyrus bretschneideri</i>      | Gansu,<br>China    | KR045616        | KU710911        | KR045657        | KU710988        | KU710944        | – | – | – | – |
| <i>Cytospora leucosperma</i>       | CFCC 89894        | <i>Pyrus bretschneideri</i>      | Qinghai,<br>China  | KR045617        | KU710912        | KR045658        | KU710989        | KU710945        | – | – | – | – |
| <i>Cytospora leucostoma</i>        | CFCC 50023        | <i>Cornus alba</i>               | Shanxi,<br>China   | KR045635        | KU710926        | KR045676        | KU711003        | KU710964        | – | – | – | – |
| <i>Cytospora leucostoma</i>        | CFCC 50024        | <i>Prunus pseudocerasus</i>      | Qinghai,<br>China  | MH933640        | –               | MH933576        | MH933547        | MH933605        | – | – | – | – |
| <i>Cytospora leucostoma</i>        | CFCC 53140        | <i>Prunus sibirica</i>           | Beijing,<br>China  | MN854445        | MN850753        | MN861115        | MN850760        | MN850746        | – | – | – | – |
| <i>Cytospora leucostoma</i>        | CFCC 53141        | <i>Prunus sibirica</i>           | Beijing,<br>China  | MN854446        | MN850754        | MN861116        | MN850761        | MN850747        | – | – | – | – |
| <i>Cytospora leucostoma</i>        | CFCC 53156        | <i>Juglans mandshurica</i>       | Beijing,<br>China  | MN854447        | MN850755        | MN861117        | MN850762        | MN850748        | – | – | – | – |
| <i>Cytospora leucostoma</i>        | CFCC 53167        | <i>Prunus armeniaca</i>          | Xinjiang,<br>China | MK673056        | MK672946        | MK672972        | MK673026        | MK672998        | – | – | – | – |
| <i>Cytospora leucostoma</i>        | CFCC 53169        | <i>Prunus persica</i>            | Beijing,<br>China  | MK673080        | MK672966        | MK672996        | MK673050        | MK673020        | – | – | – | – |
| <i>Cytospora leucostoma</i>        | CFCC 53170        | <i>Prunus persica</i>            | Beijing,<br>China  | MK673081        | MK672967        | MK672997        | MK673051        | MK673021        | – | – | – | – |
| <i>Cytospora leucostoma</i>        | CFCC 54680        | <i>Corylus heterophylla</i>      | Beijing,<br>China  | MW839857        | MW815890        | MW883973        | MW815941        | MW815955        | – | – | – | – |
| <i>Cytospora leucostoma</i>        | CFCC 54681        | <i>Corylus heterophylla</i>      | Beijing,<br>China  | MW839857        | MW815891        | MW883974        | MW815942        | MW815956        | – | – | – | – |
| <i>Cytospora leucostoma</i>        | CFCC 54682        | <i>Corylus heterophylla</i>      | Beijing,<br>China  | MW839857        | MW815892        | MW883975        | MW815943        | MW815957        | – | – | – | – |
| <i>Cytospora leucostoma</i>        | CFCC 54683        | <i>Corylus heterophylla</i>      | Beijing,<br>China  | MW839857        | MW815893        | MW883976        | MW815944        | MW815958        | – | – | – | – |
| <b><i>Cytospora leucostoma</i></b> | <b>CFCC 55474</b> | <b><i>Euonymus japonicus</i></b> | <b>China</b>       | <b>OQ344742</b> | <b>OQ398753</b> | <b>OQ398781</b> | <b>OQ410615</b> | <b>OQ398726</b> | – | – | – | – |
| <b><i>Cytospora leucostoma</i></b> | <b>CFCC 55475</b> | <b><i>Euonymus japonicus</i></b> | <b>China</b>       | <b>OQ344743</b> | <b>OQ398754</b> | <b>OQ398782</b> | <b>OQ410616</b> | <b>OQ398727</b> | – | – | – | – |
| <b><i>Cytospora leucostoma</i></b> | <b>CFCC 55476</b> | <b><i>Euonymus japonicus</i></b> | <b>China</b>       | <b>OQ344744</b> | <b>OQ398755</b> | <b>OQ398783</b> | <b>OQ410617</b> | –               | – | – | – | – |
| <b><i>Cytospora leucostoma</i></b> | <b>CFCC 55478</b> | <b><i>Euonymus japonicus</i></b> | <b>China</b>       | <b>OQ344745</b> | <b>OQ398756</b> | <b>OQ398784</b> | <b>OQ410618</b> | <b>OQ398728</b> | – | – | – | – |
| <b><i>Cytospora leucostoma</i></b> | <b>CFCC 55519</b> | <b><i>Euonymus japonicus</i></b> | <b>China</b>       | <b>OQ344746</b> | <b>OQ398757</b> | <b>OQ398785</b> | <b>OQ410619</b> | <b>OQ398729</b> | – | – | – | – |
| <b><i>Cytospora leucostoma</i></b> | <b>CFCC 55520</b> | <b><i>Euonymus japonicus</i></b> | <b>China</b>       | <b>OQ344747</b> | <b>OQ398758</b> | <b>OQ398786</b> | <b>OQ410620</b> | <b>OQ398730</b> | – | – | – | – |

|                                   |                 |                                          |                 |          |          |          |          |          |   |   |   |   |
|-----------------------------------|-----------------|------------------------------------------|-----------------|----------|----------|----------|----------|----------|---|---|---|---|
| <i>Cytospora leucostoma</i>       | CFCC 55521      | <i>Euonymus japonicus</i>                | China           | OQ344748 | –        | OQ398787 | OQ410621 | OQ398731 | – | – | – | – |
| <i>Cytospora lumnitzericola</i>   | MFLUCC 17-0508* | <i>Lumnitzera racemosa</i>               | Tailand         | MG975778 | –        | –        | MH253457 | MH253453 | – | – | – | – |
| <i>Cytospora mali</i>             | CFCC 50028      | <i>Malus pumila</i>                      | Gansu, China    | MH933641 | MH933513 | MH933577 | MH933548 | MH933606 | – | – | – | – |
| <i>Cytospora mali</i>             | CFCC 50029      | <i>Malus pumila</i>                      | Ningxia, China  | MH933642 | MH933514 | MH933578 | MH933549 | MH933607 | – | – | – | – |
| <i>Cytospora mali</i>             | CFCC 50030      | <i>Malus pumila</i>                      | Shaanxi, China  | MH933643 | MH933524 | MH933579 | MH933550 | MH933608 | – | – | – | – |
| <i>Cytospora mali</i>             | CFCC 50031      | <i>Crataegus</i> sp.                     | Shanxi, China   | KR045636 | KU710927 | KR045677 | KU711004 | KU710965 | – | – | – | – |
| <i>Cytospora mali</i>             | CFCC 50044      | <i>Malus baccata</i>                     | Qinghai, China  | KR045637 | KU710928 | KR045678 | KU711005 | KU710966 | – | – | – | – |
| <i>Cytospora mali-spectabilis</i> | CFCC 53181*     | <i>Malus spectabilis</i> ‘Royalty’       | Xinjiang, China | MK673066 | MK672953 | MK672982 | MK673036 | MK673006 | – | – | – | – |
| <i>Cytospora melnikii</i>         | CFCC 89984      | <i>Rhus typhina</i>                      | Xinjiang, China | MH933678 | MH933515 | MH933580 | MH933551 | MH933609 | – | – | – | – |
| <i>Cytospora melnikii</i>         | MFLUCC 15-0851  | <i>Malus domestica</i>                   | Russia          | KY417735 | –        | –        | KY417701 | KY417803 | – | – | – | – |
| <i>Cytospora melnikii</i>         | MFLUCC 16-0635  | <i>Populus nigra</i> var. <i>italica</i> | Russia          | KY417736 | –        | –        | KY417702 | KY417804 | – | – | – | – |
| <i>Cytospora myrtagena</i>        | CFCC 52454      | <i>Castanea mollissima</i>               | China           | MK432614 | –        | –        | MK442938 | MK578074 | – | – | – | – |
| <i>Cytospora myrtagena</i>        | CFCC 52455      | <i>Castanea mollissima</i>               | China           | MK432615 | –        | –        | MK442939 | MK578075 | – | – | – | – |
| <i>Cytospora nivea</i>            | MFLUCC 15-0860  | <i>Salix acutifolia</i>                  | Russia          | KY417737 | –        | –        | KY417703 | KY417805 | – | – | – | – |
| <i>Cytospora nivea</i>            | CFCC 89641      | <i>Elaeagnus angustifolia</i>            | Ningxia, China  | KF765683 | KU710929 | KR045679 | KU711006 | KU710967 | – | – | – | – |
| <i>Cytospora nivea</i>            | CFCC 89643      | <i>Salix psammophila</i>                 | Shaanxi, China  | KF765685 | KP310863 | KP310829 | –        | KU710968 | – | – | – | – |
| <i>Cytospora notastroma</i>       | NE_*FR5         | <i>Populus tremuloides</i>               | USA             | JX438632 | JX438543 | –        | –        | –        | – | – | – | – |
| <i>Cytospora notastroma</i>       | NE_*FR8         | <i>Populus tremuloides</i>               | USA             | JX438633 | JX438542 | –        | –        | –        | – | – | – | – |
| <i>Cytospora ochracea</i>         | CFCC 53164*     | <i>Cotoneaster</i> sp.                   | Xinjiang, China | MK673060 | MK672949 | MK672976 | MK673030 | MK673001 | – | – | – | – |
| <i>Cytospora oleicola</i>         | CBS 144248*     | <i>Olea europaea</i>                     | California, USA | MG971944 | MG971660 | MG971752 | MG972098 | –        | – | – | – | – |
| <i>Cytospora olivacea</i>         | CFCC 53174      | <i>Prunus cerasifera</i>                 | Xinjiang, China | MK673058 | –        | MK672974 | MK673028 | MK672999 | – | – | – | – |

|                                    |                 |                                             |                    |          |          |          |          |          |   |   |   |   |
|------------------------------------|-----------------|---------------------------------------------|--------------------|----------|----------|----------|----------|----------|---|---|---|---|
| <i>Cytospora olivacea</i>          | CFCC 53175      | <i>Prunus dulcis</i>                        | Xinjiang,<br>China | MK673062 | –        | MK672978 | MK673032 | MK673003 | – | – | – | – |
| <i>Cytospora olivacea</i>          | CFCC 53176*     | <i>Sorbus tianschanica</i>                  | Xinjiang,<br>China | MK673068 | MK672955 | MK672984 | MK673038 | MK673008 | – | – | – | – |
| <i>Cytospora olivacea</i>          | CFCC 53177      | <i>Prunus virginiana</i>                    | Xinjiang,<br>China | MK673071 | –        | MK672987 | MK673041 | MK673011 | – | – | – | – |
| <i>Cytospora palm</i>              | CXY 1276        | <i>Cotinus coggygria</i>                    | Beijing,<br>China  | JN402990 | KJ781296 | –        | –        | –        | – | – | – | – |
| <i>Cytospora palm</i>              | CXY 1280*       | <i>Cotinus coggygria</i>                    | Beijing,<br>China  | JN411939 | KJ781297 | –        | –        | –        | – | – | – | – |
| <i>Cytospora paracinnamomea</i>    | CFCC 55453*     | <i>Salix matsudana</i>                      | Gansu,<br>China    | MZ702594 | OK303576 | OK303643 | OK303456 | OK303515 | – | – | – | – |
| <i>Cytospora paracinnamomea</i>    | CFCC 55455*     | <i>Salix matsudana</i>                      | Gansu,<br>China    | MZ702598 | OK303580 | OK303647 | OK303460 | OK303519 | – | – | – | – |
| <i>Cytospora parakantschavelii</i> | MFLUCC 15-0857* | <i>Populus × sibirica</i>                   | Russia             | KY417738 | –        | –        | KY417704 | KY417806 | – | – | – | – |
| <i>Cytospora parakantschavelii</i> | MFLUCC 16-0575  | <i>Pyrus pyraister</i>                      | Russia             | KY417739 | –        | –        | KY417705 | KY417807 | – | – | – | – |
| <i>Cytospora parapistaciae</i>     | CBS 144506*     | <i>Pistacia vera</i>                        | California,<br>USA | MG971804 | MG971519 | MG971669 | MG971954 | –        | – | – | – | – |
| <i>Cytospora parasitica</i>        | MFLUCC 15-0507* | <i>Malus domestica</i>                      | Russia             | KY417740 | –        | –        | KY417706 | KY417808 | – | – | – | – |
| <i>Cytospora parasitica</i>        | XJAU 2542-1     | <i>Malus</i> sp.                            | Xinjiang,<br>China | MH798884 | MH813452 | –        | –        | –        | – | – | – | – |
| <i>Cytospora parasitica</i>        | CFCC 53171      | <i>Malus pumila</i>                         | Xinjiang,<br>China | MK673061 | MK672950 | MK672977 | MK673031 | MK673002 | – | – | – | – |
| <i>Cytospora parasitica</i>        | CFCC 53172      | <i>Malus pumila</i>                         | Xinjiang,<br>China | MK673069 | MK672956 | MK672985 | MK673039 | MK673009 | – | – | – | – |
| <i>Cytospora parasitica</i>        | CFCC 53173      | <i>Berberis</i> sp.                         | Xinjiang,<br>China | MK673070 | MK672957 | MK672986 | MK673040 | MK673010 | – | – | – | – |
| <i>Cytospora paratranslucens</i>   | MFLUCC 15-0506* | <i>Populus alba</i> var.<br><i>bolleana</i> | Russia             | KY417741 | –        | –        | KY417707 | KY417809 | – | – | – | – |
| <i>Cytospora paratranslucens</i>   | MFLUCC 16-0627  | <i>Populus alba</i>                         | Russia             | KY417742 | –        | –        | KY417708 | KY417810 | – | – | – | – |
| <i>Cytospora phialidica</i>        | MFLUCC 17-2498  | <i>Alnus glutinosa</i>                      | Italy              | MT177932 | MT454014 | –        | –        | MT432209 | – | – | – | – |

|                                 |                 |                               |                    |          |          |          |          |          |   |   |   |   |
|---------------------------------|-----------------|-------------------------------|--------------------|----------|----------|----------|----------|----------|---|---|---|---|
| <i>Cytospora piceae</i>         | CFCC 52841**    | <i>Picea crassifolia</i>      | Xinjiang,<br>China | MH820398 | MH820402 | MH820387 | MH820406 | MH820395 | – | – | – | – |
| <i>Cytospora piceae</i>         | CFCC 52842*     | <i>Picea crassifolia</i>      | Xinjiang,<br>China | MH820399 | MH820403 | MH820388 | MH820407 | MH820396 | – | – | – | – |
| <i>Cytospora pingbianensis</i>  | MFLUCC 18-1204* | Undefined wood                | Yunnan,<br>China   | MK912135 | –        | –        | MN685817 | MN685826 | – | – | – | – |
| <i>Cytospora pistaciae</i>      | CBS 144238*     | <i>Pistacia vera</i>          | California,<br>USA | MG971802 | MG971517 | MG971667 | MG971952 | –        | – | – | – | – |
| <i>Cytospora platanicola</i>    | MFLU 17-0327    | <i>Platanus hybrida</i>       | Italy              | MH253451 | –        | –        | MH253449 | MH253450 | – | – | – | – |
| <i>Cytospora platycladi</i>     | CFCC 50504**    | <i>Platycladus orientalis</i> | Yunnan,<br>China   | MH933645 | MH933516 | MH933581 | MH933552 | MH933610 | – | – | – | – |
| <i>Cytospora platycladi</i>     | CFCC 50505*     | <i>Platycladus orientalis</i> | Yunnan,<br>China   | MH933646 | MH933517 | MH933582 | MH933553 | MH933611 | – | – | – | – |
| <i>Cytospora platycladi</i>     | CFCC 50506*     | <i>Platycladus orientalis</i> | Yunnan,<br>China   | MH933647 | MH933518 | MH933583 | MH933554 | MH933612 | – | – | – | – |
| <i>Cytospora platycladicola</i> | CFCC 50038**    | <i>Platycladus orientalis</i> | Gansu,<br>China    | KT222840 | MH933519 | MH933584 | MH933555 | MH933613 | – | – | – | – |
| <i>Cytospora platycladicola</i> | CFCC 50039*     | <i>Platycladus orientalis</i> | Gansu,<br>China    | KR045642 | KU710931 | KR045683 | KU711008 | KU710973 | – | – | – | – |
| <i>Cytospora plurivora</i>      | CBS 144239*     | <i>Olea europaea</i>          | California,<br>USA | MG971861 | MG971572 | MG971726 | MG972010 | –        | – | – | – | – |
| <i>Cytospora populicola</i>     | CBS 144240      | <i>Populus deltoides</i>      | California,<br>USA | MG971891 | MG971601 | MG971757 | MG972040 | –        | – | – | – | – |
| <i>Cytospora populina</i>       | CFCC 89644*     | <i>Salix psammophila</i>      | Shaanxi,<br>China  | KF765686 | KU710930 | KR045681 | KU711007 | KU710969 | – | – | – | – |
| <i>Cytospora populinopsis</i>   | CFCC 50032*     | <i>Sorbus aucuparia</i>       | Ningxia,<br>China  | MH933648 | MH933520 | MH933585 | MH933556 | MH933614 | – | – | – | – |
| <i>Cytospora populinopsis</i>   | CFCC 50033      | <i>Sorbus aucuparia</i>       | Ningxia,<br>China  | MH933649 | MH933521 | MH933586 | MH933557 | MH933615 | – | – | – | – |
| <i>Cytospora predappioensis</i> | MFLUCC 17-2458* | <i>Platanus hybrida</i>       | Italy              | MG873484 | –        | –        | –        | –        | – | – | – | – |
| <i>Cytospora prunicola</i>      | MFLU 17-0995*   | <i>Prunus</i> sp.             | Italy              | MG742350 | –        | –        | MG742353 | MG742352 | – | – | – | – |
| <i>Cytospora pruni-mume</i>     | CFCC 53179      | <i>Prunus armeniaca</i>       | Xinjiang,<br>China | MK673057 | MK672947 | MK672973 | MK673027 | –        | – | – | – | – |
| <i>Cytospora pruni-mume</i>     | CFCC 53180*     | <i>Prunus mume</i>            | Xinjiang,<br>China | MK673067 | MK672954 | MK672983 | MK673037 | MK673007 | – | – | – | – |

|                               |                     |                           |                         |          |          |          |          |          |   |   |   |   |
|-------------------------------|---------------------|---------------------------|-------------------------|----------|----------|----------|----------|----------|---|---|---|---|
| <i>Cytospora pruinopsis</i>   | CFCC 50034*         | <i>Ulmus pumila</i>       | Shaanxi,<br>China       | KP281259 | KP310849 | KP310819 | KP310836 | KU710970 | – | – | – | – |
| <i>Cytospora pruinopsis</i>   | CFCC 50035          | <i>Ulmus pumila</i>       | Jilin, China            | KP281260 | KP310850 | KP310820 | KP310837 | KU710971 | – | – | – | – |
| <i>Cytospora pruinopsis</i>   | CFCC 53153          | <i>Ulmus pumila</i>       | Beijing,<br>China       | MN854451 | MN850759 | MN861121 | MN850763 | MN850752 | – | – | – | – |
| <i>Cytospora pruinosa</i>     | CFCC 50036          | <i>Syringa oblata</i>     | Qinghai,<br>China       | KP310800 | KP310845 | KP310815 | KP310832 | –        | – | – | – | – |
| <i>Cytospora pruinosa</i>     | CFCC 50037          | <i>Syringa oblata</i>     | Qinghai,<br>China       | MH933650 | MH933522 | MH933589 | MH933558 | –        | – | – | – | – |
| <i>Cytospora pubescentis</i>  | MFLUCC 18-<br>1201* | <i>Quercus pubescens</i>  | Forlì-<br>Cesena, Italy | MK912130 | –        | –        | MN685812 | MN685821 | – | – | – | – |
| <i>Cytospora punicae</i>      | CBS 144244          | <i>Punica granatum</i>    | California,<br>USA      | MG971943 | MG971654 | MG971798 | MG972091 | –        | – | – | – | – |
| <i>Cytospora quercicola</i>   | MFLU 17-0881        | <i>Quercus</i> sp.        | Italy                   | MF190128 | –        | –        | –        | –        | – | – | – | – |
| <i>Cytospora quercicola</i>   | MFLUCC 14-<br>0867* | <i>Quercus</i> sp.        | Italy                   | MF190129 | –        | –        | –        | –        | – | – | – | – |
| <i>Cytospora ribis</i>        | CFCC 50026          | <i>Ulmus pumila</i>       | Qinghai,<br>China       | KP281267 | KP310856 | KP310826 | KP310843 | KU710972 | – | – | – | – |
| <i>Cytospora ribis</i>        | CFCC 50027          | <i>Ulmus pumila</i>       | Qinghai,<br>China       | KP281268 | KP310857 | KP310827 | KP310844 | –        | – | – | – | – |
| <i>Cytospora rosae</i>        | MFLU 17-0885        | <i>Rosa canina</i>        | Italy                   | MF190131 | –        | –        | –        | –        | – | – | – | – |
| <i>Cytospora rosicola</i>     | CF 20197024*        | <i>Rosa</i> sp.           | Tibet, China            | MK673079 | MK672965 | MK672995 | MK673049 | MK673019 | – | – | – | – |
| <i>Cytospora rosigena</i>     | MFLUCC 18-<br>0921* | <i>Rosa</i> sp.           | Russia                  | MN879872 | –        | –        | –        | –        | – | – | – | – |
| <i>Cytospora rostrata</i>     | CFCC 89909          | <i>Salix cupularis</i>    | Gansu,<br>China         | KR045643 | KU710932 | KR045684 | KU711009 | KU710974 | – | – | – | – |
| <i>Cytospora rostrata</i>     | CFCC 89910          | <i>Salix cupularis</i>    | Gansu,<br>China         | KR045644 | KU710933 | –        | KU711010 | KU710975 | – | – | – | – |
| <i>Cytospora rusanovii</i>    | MFLUCC 15-<br>0853  | <i>Populus × sibirica</i> | Russia                  | KY417743 | –        | –        | KY417709 | KY417811 | – | – | – | – |
| <i>Cytospora rusanovii</i>    | MFLUCC 15-<br>0854* | <i>Salix babylonica</i>   | Russia                  | KY417744 | –        | –        | KY417710 | KY417812 | – | – | – | – |
| <i>Cytospora salicacearum</i> | MFLUCC 15-<br>0509  | <i>Salix alba</i>         | Russia                  | KY417746 | –        | –        | KY417712 | KY417814 | – | – | – | – |
| <i>Cytospora salicacearum</i> | MFLUCC 15-<br>0861  | <i>Salix × fragilis</i>   | Russia                  | KY417745 | –        | –        | KY417711 | KY417813 | – | – | – | – |

|                                  |                   |                                                    |               |                 |                 |                 |                 |                 |   |   |   |   |
|----------------------------------|-------------------|----------------------------------------------------|---------------|-----------------|-----------------|-----------------|-----------------|-----------------|---|---|---|---|
| <i>Cytospora salicacearum</i>    | MFLUCC 16-0587    | <i>Prunus cerasus</i>                              | Russia        | KY417742        | –               | –               | KY417708        | KY417810        | – | – | – | – |
| <i>Cytospora salicacearum</i>    | MFLUCC 16-0576    | <i>Populus nigra</i> var. <i>italica</i>           | Russia        | KY417741        | –               | –               | KY417707        | KY417809        | – | – | – | – |
| <i>Cytospora salicicola</i>      | MFLUCC 14-1052*   | <i>Salix alba</i>                                  | Russia        | KU982636        | –               | –               | KU982637        | –               | – | – | – | – |
| <i>Cytospora salicicola</i>      | MFLUCC 15-0866    | <i>Salix</i> sp.                                   | Thailand      | KY417749        | –               | –               | KY417715        | KY417817        | – | – | – | – |
| <i>Cytospora salicina</i>        | MFLUCC 15-0862    | <i>Salix alba</i>                                  | Russia        | KY417750        | –               | –               | KY417716        | KY417818        | – | – | – | – |
| <i>Cytospora salicina</i>        | MFLUCC 16-0637    | <i>Salix</i> × <i>fragilis</i>                     | Russia        | KY417751        | –               | –               | KY417717        | KY417819        | – | – | – | – |
| <i>Cytospora schulzeri</i>       | CFCC 50042        | <i>Malus pumila</i>                                | Gansu, China  | KR045650        | KU710937        | KR045691        | KU711014        | KU710981        | – | – | – | – |
| <i>Cytospora sibiraeae</i>       | CFCC 50045*       | <i>Sibiraea angustata</i>                          | Gansu, China  | KR045651        | KU710938        | KR045692        | KU711015        | KU710982        | – | – | – | – |
| <i>Cytospora sibiraeae</i>       | CFCC 50046        | <i>Sibiraea angustata</i>                          | Gansu, China  | KR045652        | KU710939        | KR045693        | KU711015        | KU710983        | – | – | – | – |
| <i>Cytospora sophorae</i>        | CFCC 50047        | <i>Styphnolobium japonicum</i>                     | Shanxi, China | KR045653        | KU710940        | KR045694        | KU711017        | KU710984        | – | – | – | – |
| <i>Cytospora sophorae</i>        | CFCC 50048        | <i>Magnolia grandiflora</i>                        | Shanxi, China | MH820401        | MH820405        | MH820390        | MH820409        | MH820397        | – | – | – | – |
| <i>Cytospora sophorae</i>        | CFCC 89598        | <i>Styphnolobium japonicum</i>                     | Gansu, China  | KR045654        | KU710941        | KR045695        | KU711018        | KU710985        | – | – | – | – |
| <b><i>Cytospora sophorae</i></b> | <b>CFCC 55523</b> | <b><i>Euonymus japonicus</i></b>                   | <b>China</b>  | <b>OQ344749</b> | <b>OQ398759</b> | <b>OQ398788</b> | <b>OQ410622</b> | <b>OQ398732</b> | – | – | – | – |
| <i>Cytospora sophoricola</i>     | CFCC 89596        | <i>Styphnolobium japonicum</i> var. <i>pendula</i> | Gansu, China  | KR045656        | KU710943        | KR045697        | KU711020        | KU710987        | – | – | – | – |
| <i>Cytospora sophoricola</i>     | CFCC 89595*       | <i>Styphnolobium japonicum</i> var. <i>pendula</i> | Gansu, China  | KR045655        | KU710942        | KR045696        | KU711019        | KU710986        | – | – | – | – |
| <i>Cytospora sophoriopsis</i>    | CFCC 55469        | <i>Salix matsudana</i>                             | Gansu, China  | MZ702583        | OK303565        | OK303632        | OK303445        | OK303504        | – | – | – | – |
| <i>Cytospora sophoriopsis</i>    | CFCC 89600        | <i>Styphnolobium japonicum</i>                     | Gansu, China  | KR045623        | KU710915        | KP310817        | KU710992        | KU710951        | – | – | – | – |
| <i>Cytospora sorbi</i>           | MFLUCC 16-0631*   | <i>Sorbus aucuparia</i>                            | Russia        | KY417752        | –               | –               | KY417718        | KY417820        | – | – | – | – |

|                               |                 |                                 |                       |          |          |          |          |          |   |   |   |   |
|-------------------------------|-----------------|---------------------------------|-----------------------|----------|----------|----------|----------|----------|---|---|---|---|
| <i>Cytospora sorbicola</i>    | MFLUCC 16-0584* | <i>Acer pseudoplatanus</i>      | Russia                | KY417755 | –        | –        | KY417721 | KY417823 | – | – | – | – |
| <i>Cytospora sorbicola</i>    | MFLUCC 16-0633  | <i>Cotoneaster melanocarpus</i> | Russia                | KY417758 | –        | –        | KY417724 | KY417826 | – | – | – | – |
| <i>Cytospora sorbina</i>      | CF 20197660*    | <i>Sorbus tianschanica</i>      | Xinjiang, China       | MK673052 | MK672943 | MK672968 | MK673022 | –        | – | – | – | – |
| <i>Cytospora spiraeae</i>     | CFCC 50049*     | <i>Spiraea salicifolia</i>      | Gansu, China          | MG707859 | –        | –        | MG708196 | MG708199 | – | – | – | – |
| <i>Cytospora spiraeae</i>     | CFCC 50050      | <i>Spiraea salicifolia</i>      | Gansu, China          | MG707860 | –        | –        | MG708197 | MG708200 | – | – | – | – |
| <i>Cytospora spiraeicola</i>  | CFCC 53138*     | <i>Spiraea salicifolia</i>      | Beijing, China        | MN854448 | MN850756 | MN861118 | –        | MN850749 | – | – | – | – |
| <i>Cytospora spiraeicola</i>  | CFCC 53139      | <i>Tilia nobilis</i>            | Beijing, China        | MN854449 | MN850757 | MN861119 | –        | MN850750 | – | – | – | – |
| <i>Cytospora tamaricicola</i> | CFCC 50507      | <i>Rosa multiflora</i>          | Yunnan, China         | MH933651 | MH933525 | MH933587 | MH933559 | MH933616 | – | – | – | – |
| <i>Cytospora tamaricicola</i> | CFCC 50508*     | <i>Tamarix chinensis</i>        | Yunnan, China         | MH933652 | MH933523 | MH933588 | MH933560 | MH933617 | – | – | – | – |
| <i>Cytospora tanaitica</i>    | MFLUCC 14-1057* | <i>Betula pubescens</i>         | Russia                | KT459411 | –        | –        | KT459413 | –        | – | – | – | – |
| <i>Cytospora thailandica</i>  | MFLUCC 17-0262* | <i>Xylocarpus moluccensis</i>   | Thailand              | MG975776 | –        | –        | MH253459 | MH253455 | – | – | – | – |
| <i>Cytospora thailandica</i>  | MFLUCC 17-0263* | <i>Xylocarpus moluccensis</i>   | Thailand              | MG975777 | –        | –        | MH253460 | MH253456 | – | – | – | – |
| <i>Cytospora tibetensis</i>   | CF 20197026     | <i>Cotoneaster</i> sp.          | Tibet, China          | MK673076 | MK672962 | MK672992 | MK673046 | MK673016 | – | – | – | – |
| <i>Cytospora tibetensis</i>   | CF 20197029     | <i>Cotoneaster</i> sp.          | Tibet, China          | MK673077 | MK672963 | MK672993 | MK673047 | MK673017 | – | – | – | – |
| <i>Cytospora tibetensis</i>   | CF 20197032*    | <i>Cotoneaster</i> sp.          | Tibet, China          | MK673078 | MK672964 | MK672994 | MK673048 | MK673018 | – | – | – | – |
| <i>Cytospora tibouchinae</i>  | CPC 26333*      | <i>Tibouchina semidecandra</i>  | France                | KX228284 | –        | –        | –        | –        | – | – | – | – |
| <i>Cytospora translucens</i>  | CXY 1351        | <i>Populus davidiana</i>        | Inner Mongolia, China | KM034874 | –        | KM034895 | –        | –        | – | – | – | – |
| <i>Cytospora translucens</i>  | CXY 1359        | <i>Populus</i> × Beijingensis   | Beijing, China        | KM034871 | –        | KM034894 | –        | –        | – | – | – | – |
| <i>Cytospora ulmi</i>         | MFLUCC 15-0863* | <i>Ulmus minor</i>              | Russia                | KY417759 | –        | –        | –        | –        | – | – | – | – |

|                                       |                    |                                                  |                    |                 |                 |                 |                 |                 |   |   |          |          |
|---------------------------------------|--------------------|--------------------------------------------------|--------------------|-----------------|-----------------|-----------------|-----------------|-----------------|---|---|----------|----------|
| <i>Cytospora verrucosa</i>            | CFCC 53157 *       | <i>Platycladus orientalis</i>                    | Beijing,<br>China  | MW418408        | MW422923        | MW422935        | –               | MW422911        | – | – | –        | –        |
| <i>Cytospora verrucosa</i>            | CFCC 53158         | <i>Platycladus orientalis</i>                    | Beijing,<br>China  | MW418410        | MW422925        | MW422937        | MW422901        | MW422913        | – | – | –        | –        |
| <i>Cytospora verrucosa</i>            | CFCC 54369         | <i>Platycladus orientalis</i>                    | Beijing,<br>China  | MW418409        | MW422924        | MW422936        | –               | MW422912        | – | – | –        | –        |
| <i>Cytospora verrucosa</i>            | CFCC 54370         | <i>Platycladus orientalis</i>                    | Beijing,<br>China  | MW418411        | MW422926        | MW422938        | MW422902        | MW422914        | – | – | –        | –        |
| <i>Cytospora vinacea</i>              | CBS 141585*        | <i>Vitis interspecific hybrid</i><br>‘Vidal’     | USA                | KX256256        | KX256277        | KX256235        | –               | –               | – | – | –        | –        |
| <i>Cytospora viridistroma</i>         | CBS 202.36*        | <i>Cercis canadensis</i><br>Castigl.             | USA                | MN172408        | MN271853        | –               | –               | –               | – | – | –        | –        |
| <i>Cytospora viticola</i>             | Cyt2               | <i>Vitis interspecific hybrid</i><br>‘Frontenac’ | USA                | KX256238        | KX256259        | KX256217        | –               | –               | – | – | –        | –        |
| <i>Cytospora viticola</i>             | CBS 141586*        | <i>Vitis vinifera</i><br>‘CabernetFranc’         | USA                | KX256239        | KX256260        | KX256218        | –               | –               | – | – | –        | –        |
| <i>Cytospora xinjiangensis</i>        | CFCC 53182         | <i>Rosa</i> sp.                                  | Xinjiang,<br>China | MK673064        | MK672951        | MK672980        | MK673034        | MK673004        | – | – | –        | –        |
| <i>Cytospora xinjiangensis</i>        | CFCC 53183*        | <i>Rosa</i> sp.                                  | Xinjiang,<br>China | MK673065        | MK672952        | MK672981        | MK673035        | MK673005        | – | – | –        | –        |
| <i>Cytospora xinglongensis</i>        | CFCC 52458         | <i>Castanea mollissima</i>                       | China              | MK432622        | –               | –               | MK442946        | MK578082        | – | – | –        | –        |
| <i>Cytospora xinglongensis</i>        | CFCC 52459         | <i>Castanea mollissima</i>                       | China              | MK432623        | –               | –               | MK442947        | MK578083        | – | – | –        | –        |
| <i>Cytospora xylocarpi</i>            | MFLUCC 17-0251*    | <i>Xylocarpus granatum</i>                       | Thailand           | MG975775        | –               | –               | MH253458        | MH253454        | – | – | –        | –        |
| <b><i>Cytospora zhaitangensis</i></b> | <b>CFCC 56227*</b> | <b><i>Euonymus japonicus</i></b>                 | <b>China</b>       | <b>OQ344750</b> | <b>OQ398760</b> | <b>OQ398789</b> | <b>OQ410623</b> | <b>OQ398733</b> | – | – | –        | –        |
| <b><i>Cytospora zhaitangensis</i></b> | <b>CFCC 57537</b>  | <b><i>Euonymus japonicus</i></b>                 | <b>China</b>       | <b>OQ344751</b> | <b>OQ398761</b> | <b>OQ398790</b> | <b>OQ410624</b> | <b>OQ398734</b> | – | – | –        | –        |
| <i>Diaporthe vaccinii</i>             | CBS 160.32         | <i>Vaccinium macrocarpon</i>                     | USA                | KC343228        | KC343954        | KC344196        | JQ807297        | –               | – | – | –        | –        |
| <i>Diaporthe absenteum</i>            | LC 3924*           | <i>Camellia sinensis</i>                         | China              | KP267897        | KP267971        | KP293477        | –               | –               | – | – | –        | KP293547 |
| <i>Diaporthe acaciigena</i>           | CBS 129521*        | <i>Acacia retinodes</i>                          | Australia          | KC343005        | KC343731        | KC343973        | –               | –               | – | – | KC343247 | KC343489 |
| <i>Diaporthe acericola</i>            | MFLUCC 17-0956*    | <i>Acer negundo</i>                              | Italy              | KY964224        | KY964180        | KY964074        | –               | –               | – | – | KY964137 | –        |

|                                 |               |                                |              |          |          |          |   |   |   |   |          |          |
|---------------------------------|---------------|--------------------------------|--------------|----------|----------|----------|---|---|---|---|----------|----------|
| <i>Diaporthe acerigena</i>      | CFCC 52554*   | <i>Acer tataricum</i>          | China        | MH121489 | MH121531 | –        | – | – | – | – | MH121413 | MH121449 |
| <i>Diaporthe acerigena</i>      | CFCC 52555    | <i>Acer tataricum</i>          | China        | MH121490 | MH121532 | –        | – | – | – | – | MH121414 | MH121450 |
| <i>Diaporthe acerina</i>        | CBS 137.27    | <i>Acer negundo</i>            | NA           | KC343006 | KC343732 | KC343974 | – | – | – | – | KC343248 | KC343490 |
| <i>Diaporthe actinidiae</i>     | ICMP 13683*   | <i>Actinidia deliciosa</i>     | New Zealand  | KC145886 | KC145941 | –        | – | – | – | – | –        | –        |
| <i>Diaporthe acuta</i>          | PSCG 047*     | <i>Pyrus pyrifolia</i>         | China        | MK626957 | MK654802 | MK691225 | – | – | – | – | MK691125 | MK726161 |
| <i>Diaporthe acutispora</i>     | LC6161*       | <i>Coffea</i> sp.              | China        | KX986764 | KX999155 | KX999195 | – | – | – | – | KX999274 | KX999235 |
| <i>Diaporthe alangii</i>        | CFCC 52556*   | <i>Alangium kurzii</i>         | China        | MH121491 | MH121533 | MH121573 | – | – | – | – | MH121415 | MH121451 |
| <i>Diaporthe alangii</i>        | CFCC 52557    | <i>Alangium kurzii</i>         | China        | MH121492 | MH121534 | MH121574 | – | – | – | – | MH121416 | MH121452 |
| <i>Diaporthe albosinensis</i>   | CFCC 53066    | <i>Betula albosinensis</i>     | China        | MK432659 | MK578133 | MK578059 | – | – | – | – | MK442979 | MK443004 |
| <i>Diaporthe albosinensis</i>   | CFCC 53067    | <i>Betula albosinensis</i>     | China        | MK432660 | MK578134 | MK578060 | – | – | – | – | MK442980 | MK443005 |
| <i>Diaporthe alleghaniensis</i> | CBS 495.72*   | <i>Betula alleghaniensis</i>   | Canada       | MH121502 | MH121544 | MH121584 | – | – | – | – | MH121426 | MH121462 |
| <i>Diaporthe alnea</i>          | CBS 146.46*   | <i>Alnus</i> sp.               | Netherlands  | KC343008 | KC343734 | KC343976 | – | – | – | – | KC343250 | KC343492 |
| <i>Diaporthe amaranthophila</i> | MAFF 246900   | <i>Amaranthus tricolor</i>     | Japan        | LC459575 | LC459577 | LC459579 | – | – | – | – | LC459583 | LC459581 |
| <i>Diaporthe ambigua</i>        | CBS 114015    | <i>Pyrus communis</i>          | South Africa | KC343010 | KC343736 | KC343978 | – | – | – | – | KC343252 | KC343494 |
| <i>Diaporthe ampelina</i>       | STE-U 2660    | <i>Vitis vinifera</i>          | France       | –        | AY745056 | –        | – | – | – | – | AY745026 | –        |
| <i>Diaporthe amygdali</i>       | CBS 126679*   | <i>Prunus dulcis</i>           | Portugal     | MH864208 | KC343748 | KC343990 | – | – | – | – | KC343264 | KC343506 |
| <i>Diaporthe anacardii</i>      | CBS 720.97*   | <i>Anacardium occidentale</i>  | East Africa  | KC343024 | KC343750 | KC343992 | – | – | – | – | KC343266 | KC343508 |
| <i>Diaporthe angelicae</i>      | CBS 111592*   | <i>Heracleum sphondylium</i>   | Austria      | KC343027 | KC343753 | KC343995 | – | – | – | – | KC343269 | KC343511 |
| <i>Diaporthe anhuiensis</i>     | CNUCC 201901* | <i>Cunninghamia lanceolata</i> | China        | MN219718 | MN224668 | MN227008 | – | – | – | – | MN224549 | MN224556 |
| <i>Diaporthe apiculatum</i>     | CFCC 53068    | <i>Rhus chinensis</i>          | China        | MK432651 | MK578127 | MK578054 | – | – | – | – | MK442973 | MK442998 |
| <i>Diaporthe apiculatum</i>     | CFCC 53069    | <i>Rhus chinensis</i>          | China        | MK432652 | MK578128 | MK578055 | – | – | – | – | MK44297  | MK442999 |
| <i>Diaporthe aquatica</i>       | IFRDCC 3051*  | <i>Aquatic habitat</i>         | China        | JQ797437 | –        | –        | – | – | – | – | –        | –        |
| <i>Diaporthe araucanorum</i>    | CBS 145285*   | <i>Araucaria araucana</i>      | Chile        | MN509711 | MN509733 | MN509722 | – | – | – | – | MN974277 | –        |
| <i>Diaporthe araucanorum</i>    | CBS 145286    | <i>Araucaria araucana</i>      | Chile        | MN509712 | MN509734 | MN509723 | – | – | – | – | –        | –        |

|                                  |                 |                             |                    |           |           |          |   |   |   |   |          |          |
|----------------------------------|-----------------|-----------------------------|--------------------|-----------|-----------|----------|---|---|---|---|----------|----------|
| <i>Diaporthe arctii</i>          | DP0482*         | <i>Arctium lappa</i>        | Austria            | KJ590736  | KJ590776  | KJ610891 | – | – | – | – | KJ612133 | KJ659218 |
| <i>Diaporthe arecae</i>          | CBS 161.64*     | <i>Areca catechu</i>        | India              | KC343032  | KC343758  | KC344000 | – | – | – | – | KC343274 | KC343516 |
| <i>Diaporthe arengae</i>         | CBS 114979*     | <i>Arenga engleri</i>       | Hong Kong          | MF773664  | KC343760  | KC344002 | – | – | – | – | KC343276 | KC343518 |
| <i>Diaporthe arezzoensis</i>     | MFLU 19-2880*   | MFLU 19-2880T               | <i>Cytisus</i> sp. | Italy     | –         | MT454019 | – | – | – | – | MT185503 | –        |
| <i>Diaporthe aseana</i>          | MFLUCC 12-0299a | Unknown                     | Thailand           | KT459414  | KT459448  | KT459432 | – | – | – | – | KT459464 | –        |
| <i>Diaporthe asheicola</i>       | CBS 136967      | <i>Vaccinium ashei</i>      | Chile              | KJ160562  | KJ160594  | KJ160518 | – | – | – | – | KJ160542 | –        |
| <i>Diaporthe aspalathi</i>       | CBS 117169*     | <i>Aspalathus linearis</i>  | South Africa       | KC343036  | KC343762  | KC344004 | – | – | – | – | KC343278 | KC343520 |
| <i>Diaporthe australafricana</i> | CBS 111886*     | <i>Vitis vinifera</i>       | Australia          | KC343038  | KC343764  | KC344006 | – | – | – | – | KC343280 | KC343522 |
| <i>Diaporthe australiana</i>     | BRIP 66145*     | <i>Macadamia</i> sp.        | Australia          | MN708222  | MN696522  | MN696530 | – | – | – | – | –        | –        |
| <i>Diaporthe baccae</i>          | CBS 136972*     | <i>Vaccinium corymbosum</i> | Italy              | MK370623  | KJ160597  | MF418509 | – | – | – | – | MG281695 | MF418264 |
| <i>Diaporthe batatas</i>         | CBS 122.21*     | <i>Ipomoea batatas</i>      | USA                | KC343040  | KC343766  | KC344008 | – | – | – | – | KC343282 | KC343524 |
| <i>Diaporthe bauhiniae</i>       | CFCC 53071      | <i>Bauhinia purpurea</i>    | China              | MK432648  | MK578124  | MK578051 | – | – | – | – | MK442970 | MK442995 |
| <i>Diaporthe bauhiniae</i>       | CFCC 53072      | <i>Bauhinia purpurea</i>    | China              | MK432649  | MK578125  | MK578052 | – | – | – | – | MK442971 | MK442996 |
| <i>Diaporthe bauhiniae</i>       | CFCC 53073      | <i>Bauhinia purpurea</i>    | China              | MK432650  | MK578126  | MK578053 | – | – | – | – | MK442972 | MK442997 |
| <i>Diaporthe beilharziae</i>     | BRIP 54792*     | <i>Indigofera australis</i> | Australia          | JX862529  | JX862535  | KF170921 | – | – | – | – | –        | –        |
| <i>Diaporthe benedicti</i>       | SBen914         | <i>Diaporthe benedicti</i>  | USA                | KM669929  | KM669785  | –        | – | – | – | – | KM669862 | –        |
| <i>Diaporthe betulae</i>         | CFCC 50469      | <i>Betula platyphylla</i>   | China              | KT732950  | KT733016  | KT733020 | – | – | – | – | KT732997 | KT732999 |
| <i>Diaporthe betulae</i>         | CFCC 50470      | <i>Betula platyphylla</i>   | China              | KT732951  | KT733017  | KT733021 | – | – | – | – | KT732998 | KT733000 |
| <i>Diaporthe betulicola</i>      | CFCC 51128*     | <i>Betula albo-sinensis</i> | China              | KX024653  | KX024655  | KX024657 | – | – | – | – | KX024659 | KX024661 |
| <i>Diaporthe betulicola</i>      | CFCC 51129      | <i>Betula albo-sinensis</i> | China              | KX0246554 | KX0246556 | KX024658 | – | – | – | – | KX024660 | KX024662 |
| <i>Diaporthe betulina</i>        | CFCC 52560      | <i>Betula albo-sinensis</i> | China              | MH121495  | MH121537  | MH121577 | – | – | – | – | MH121419 | MH121455 |
| <i>Diaporthe betulina</i>        | CFCC 52561      | <i>Betula albo-sinensis</i> | China              | MH121496  | MH121538  | MH121578 | – | – | – | – | MH121420 | MH121456 |
| <i>Diaporthe bicincta</i>        | CBS 121004*     | <i>Juglans</i> sp.          | USA                | KC343134  | KC343860  | KC344102 | – | – | – | – | KC343376 | KC343618 |
| <i>Diaporthe biconispora</i>     | ZJUD62          | <i>Citrus maxima</i>        | China              | KJ490597  | KJ490476  | KJ490418 | – | – | – | – | –        | KJ490539 |
| <i>Diaporthe biguttulata</i>     | ZJUD47          | <i>Citrus limon</i>         | China              | KJ490582  | KJ490461  | KJ490403 | – | – | – | – | –        | KJ490524 |
| <i>Diaporthe biguttusis</i>      | CGMCC 3.17081   | <i>Lithocarpus glabra</i>   | China              | KF576282  | KF576257  | KF576306 | – | – | – | – | –        | –        |

|                                      |                 |                                |                |          |          |          |   |   |   |   |          |          |
|--------------------------------------|-----------------|--------------------------------|----------------|----------|----------|----------|---|---|---|---|----------|----------|
| <i>Diaporthe bohemiae</i>            | CBS 143347*     | <i>Vitis vinifera</i>          | Czech Republic | MK300012 | MG281536 | MG281188 | – | – | – | – | MG281710 | MG281361 |
| <i>Diaporthe brasiliensis</i>        | CBS 133183*     | <i>Aspidosperma tomentosum</i> | Brazil         | KC343042 | KC343768 | KC344010 | – | – | – | – | KC343284 | KC343526 |
| <i>Diaporthe caatingaensis</i>       | URM7485         | <i>Tacinga inamoena</i>        | Brazil         | KY085927 | KY115604 | KY115601 | – | – | – | – | KY115598 | –        |
| <i>Diaporthe camelliae-oleiferae</i> | HNZZ027*        | <i>Camellia oleifera</i>       | China          | MZ509555 | MZ504707 | MZ504718 | – | – | – | – | MZ504685 | MZ504696 |
| <i>Diaporthe camelliae-sinensis</i>  | SAUCC194.92     | <i>Camellia sinensis</i>       | China          | MT822620 | MT855932 | MT855817 | – | – | – | – | MT855699 | MT855588 |
| <i>Diaporthe camporesii</i>          | JZB320143       | <i>Urtica dioidea</i>          | Italy          | MN533805 | MN984254 | MN561316 | – | – | – | – |          |          |
| <i>Diaporthe camptothecicola</i>     | CFCC 51632      | <i>Camptotheca acuminata</i>   | China          | KY203726 | KY228887 | KY228893 | – | – | – | – | KY228877 | KY228881 |
| <i>Diaporthe canthii</i>             | CPC 19740       | <i>Canthium inerme</i>         | South Africa   | JX069864 | –        | –        | – | – | – | – | –        | –        |
| <i>Diaporthe caryae</i>              | CFCC 52563      | <i>Carya illinoensis</i>       | China          | MH121498 | MH121540 | MH121580 | – | – | – | – | MH121422 | MH121458 |
| <i>Diaporthe caryae</i>              | CFCC 52564      | <i>Carya illinoensis</i>       | China          | MH121499 | MH121541 | MH121581 | – | – | – | – | MH121423 | MH121459 |
| <i>Diaporthe cassines</i>            | CPC 21916       | <i>Cassine peragua</i>         | South Africa   | KF777155 | KF777244 | –        | – | – | – | – | –        | –        |
| <i>Diaporthe caulivora</i>           | CBS 127268      | <i>Glycine max</i>             | Croatia        | MH864501 | KC343771 | KC344013 | – | – | – | – | KC343287 | KC343529 |
| <i>Diaporthe celastrina</i>          | CBS 139.27*     | <i>Celastrus</i> sp.           | USA            | KC343047 | KC343773 | KC344015 | – | – | – | – | KC343289 | KC343531 |
| <i>Diaporthe celeris</i>             | CBS 143349*     | <i>Vitis vinifera</i>          | United Kingdom | MG281017 | MG281538 | MG281190 | – | – | – | – | MG281712 | MG281363 |
| <i>Diaporthe cercidis</i>            | CFCC 52565*     | <i>Cercis chinensis</i>        | China          | MH121500 | –        | MH121582 | – | – | – | – | MH121424 | MH121460 |
| <i>Diaporthe cercidis</i>            | CFCC 52566      | <i>Cercis chinensis</i>        | China          | MH121501 | –        | MH121583 | – | – | – | – | MH121425 | MH121461 |
| <i>Diaporthe chamaeropsis</i>        | CBS 454.81      | <i>Chamaerops humilis</i>      | Greece         | KC343048 | KC343774 | KC344016 | – | – | – | – | KC343290 | KC343532 |
| <i>Diaporthe charlesworthii</i>      | BRIP 54884m*    | <i>Rapistrum rugostrum</i>     | Australia      | KJ197288 | KJ197250 | KJ197268 | – | – | – | – | –        | –        |
| <i>Diaporthe chensiensis</i>         | CFCC 52567*     | <i>Abies chensiensis</i>       | China          | MH121502 | MH121544 | MH121584 | – | – | – | – | MH121426 | MH121462 |
| <i>Diaporthe chensiensis</i>         | CFCC 52568      | <i>Abies chensiensis</i>       | China          | MH121503 | MH121545 | MH121585 | – | – | – | – | MH121427 | MH121463 |
| <i>Diaporthe chongqingensis</i>      | PSCG 435*       | <i>Pyrus pyrifolia</i>         | China          | MK626916 | MK654866 | MK691321 | – | – | – | – | MK691209 | MK726257 |
| <i>Diaporthe chromolaenae</i>        | MFLUCC 17-1422* | <i>Chromolaena odorata</i>     | Thailand       | MT214456 |          |          | – | – | – | – |          |          |

|                                  |                 |                                |              |          |          |          |   |   |   |   |          |          |
|----------------------------------|-----------------|--------------------------------|--------------|----------|----------|----------|---|---|---|---|----------|----------|
| <i>Diaporthe cichorii</i>        | MFLUCC 17-1023* | <i>Cichorium intybus</i>       | Italy        | KY964220 | KY964176 | KY964104 | – | – | – | – | KY964133 | –        |
| <i>Diaporthe cinnamomi</i>       | CFCC 52569*     | <i>Cinnamomum</i> sp.          | China        | MH121504 | MH121546 | MH121586 | – | – | – | – | –        | MH121464 |
| <i>Diaporthe cinnamomi</i>       | CFCC 52570      | <i>Cinnamomum</i> sp.          | China        | MH121505 | MH121547 | MH121587 | – | – | – | – | –        | MH121465 |
| <i>Diaporthe cissampeli</i>      | CPC 27302*      | <i>Cissampelos capensis</i>    | South Africa | KX228273 | –        | KX228384 | – | – | – | – | –        | KX228366 |
| <i>Diaporthe citri</i>           | AR3405          | <i>Citrus</i> sp.              | USA          | KC843311 | KC843071 | KC843187 | – | – | – | – | KC843157 | KJ420881 |
| <i>Diaporthe citri</i>           | CFCC 53079      | <i>Citrus sinensis</i>         | China        | MK573940 | MK574615 | MK574635 | – | – | – | – | MK574579 | MK574595 |
| <i>Diaporthe citriasiana</i>     | CGMCC 3.15224   | <i>Citrus unshiu</i>           | China        | JQ954645 | JQ954663 | KC357459 | – | – | – | – | KC357491 | KC490515 |
| <i>Diaporthe citrichinensis</i>  | CGMCC 3.15225   | <i>Citrus</i> sp.              | China        | JQ954648 | JQ954666 | –        | – | – | – | – | KC357494 | –        |
| <i>Diaporthe collariana</i>      | MFLU 17-2770*   | <i>Magnolia champaca</i>       | Thailand     | MG806115 | MG783040 | MG783041 | – | – | – | – | MG783042 | –        |
| <i>Diaporthe compactum</i>       | LC3083*         | <i>Camellia sinensis</i>       | China        | KP267854 | KP267928 | –        | – | – | – | – | –        | KP293508 |
| <i>Diaporthe conica</i>          | CFCC 52571*     | <i>Alangium chinense</i>       | China        | MH121506 | MH121548 | MH121588 | – | – | – | – | MH121428 | MH121466 |
| <i>Diaporthe conica</i>          | CFCC 52572      | <i>Alangium chinense</i>       | China        | MH121507 | MH121549 | MH121589 | – | – | – | – | MH121429 | MH121467 |
| <i>Diaporthe constrictospora</i> | GZCC 19-0065    | Unknown                        | China        | MT385947 | MT424682 | MT424702 | – | – | – | – | MT424718 | MW022487 |
| <i>Diaporthe constrictospora</i> | GZCC 19-0084*   | Unknown                        | China        | MT385948 | MT424683 | MT424703 | – | – | – | – | MT424719 | MW022487 |
| <i>Diaporthe convolvuli</i>      | CBS 124654*     | <i>Convolvulus arvensis</i>    | Turkey       | KC343054 | KC343780 | KC344022 | – | – | – | – | KC343296 | KC343538 |
| <i>Diaporthe coryli</i>          | CFCC 53083*     | <i>Corylus mandshurica</i>     | China        | MK432661 | MK578135 | MK578061 | – | – | – | – | MK442981 | MK443006 |
| <i>Diaporthe coryli</i>          | CFCC 53084      | <i>Corylus mandshurica</i>     | China        | MK432662 | MK538176 | MK578062 | – | – | – | – | MK442982 | MK443007 |
| <i>Diaporthe corylicola</i>      | CFCC 53986*     | <i>Corylus heterophylla</i>    | China        | MW839880 | MW815894 | MW883977 | – | – | – | – | MW836684 | MW836717 |
| <i>Diaporthe corylicola</i>      | CFCC 54696      | <i>Corylus heterophylla</i>    | China        | MW839867 | MW815895 | MW883978 | – | – | – | – | MW836685 | MW836718 |
| <i>Diaporthe corylicola</i>      | CFCC 54697      | <i>Corylus heterophylla</i>    | China        | MW839882 | MW815908 | MW883991 | – | – | – | – | MW836698 | MW836731 |
| <i>Diaporthe crataegi</i>        | CBS 114435      | <i>Crataegus rhipidophylla</i> | Sweden       | KC343055 | KC343781 | KC344023 | – | – | – | – | KC343297 | KC343539 |
| <i>Diaporthe crotalariae</i>     | CBS 162.33*     | <i>Crotalaria spectabilis</i>  | USA          | MH855395 | GQ250307 | KC344024 | – | – | – | – | JX197439 | KC343540 |
| <i>Diaporthe crousii</i>         | CAA 823         | <i>Vaccinium corymbosum</i>    | Portugal     | MK792311 | MK828081 | MK837932 | – | – | – | – | MK883835 | MK871450 |
| <i>Diaporthe cucurbitae</i>      | DAOM 42078*     | <i>Cucumis</i> sp.             | Canada       | KM453210 | KM453211 | KP118848 | – | – | – | – | –        | KM453212 |

|                                   |                   |                                  |                |                 |                 |                 |          |          |          |          |                 |                 |
|-----------------------------------|-------------------|----------------------------------|----------------|-----------------|-----------------|-----------------|----------|----------|----------|----------|-----------------|-----------------|
| <i>Diaporthe cuppatea</i>         | CBS 117499*       | <i>Aspalathus linearis</i>       | South Africa   | MH863021        | KC343783        | KC344025        | –        | –        | –        | –        | KC343299        | KC343541        |
| <i>Diaporthe cynaroidis</i>       | CBS 122676*       | <i>Protea cynaroides</i>         | South Africa   | KC343058        | KC343784        | KC344026        | –        | –        | –        | –        | KC343300        | KC343542        |
| <i>Diaporthe cytosporella</i>     | FAU461            | <i>Citrus limon</i>              | Italy          | KC843307        | KC843116        | KC843221        | –        | –        | –        | –        | KC843141        | –               |
| <i>Diaporthe delonicis</i>        | MFLU 16-1059      | <i>Ipomoea batatas</i>           | China          | KP990621        | KP990651        | KP990631        | –        | –        | –        | –        | –               | KP990641        |
| <i>Diaporthe destruens</i>        | ZJUPD06           | <i>Macadamia sp.</i>             | South Africa   | MN708229        | MN696526        | MN696537        | –        | –        | –        | –        | –               | –               |
| <i>Diaporthe diospyricola</i>     | CPC 21169*        | <i>Diospyros whyteana</i>        | South Africa   | KF777209        | –               | –               | –        | –        | –        | –        | –               | –               |
| <i>Diaporthe discoidispora</i>    | ZJUD89            | <i>Citrus unshiu</i>             | China          | KJ490624        | KJ490503        | KJ490445        | –        | –        | –        | –        | –               | KJ490566        |
| <i>Diaporthe donglingensis</i>    | CFCC 56581*       | <i>Corylus heterophylla</i>      | China          | OM956090        | ON157986        | ON158021        | –        | –        | –        | –        | –               | ON157951        |
| <i>Diaporthe donglingensis</i>    | CFCC 57432        | <i>Corylus heterophylla</i>      | China          | OM956091        | ON157987        | ON158022        | –        | –        | –        | –        | –               | ON157952        |
| <i>Diaporthe dorycnii</i>         | MFLUCC 17-1015*   | <i>Dorycnium hirsutum</i>        | Italy          | KY964215        | KY964171        | KY964099        | –        | –        | –        | –        | –               | –               |
| <i>Diaporthe drenthii</i>         | BRIP 66524*       | <i>Macadamia sp.</i>             | Australia      | MN708229        | MN696526        | MN696537        | –        | –        | –        | –        | –               | –               |
| <i>Diaporthe elaeagni-glabrae</i> | LC4802            | <i>Elaeagnus glabra</i>          | China          | KX986779        | KX999171        | KX999212        | –        | –        | –        | –        | KX999281        | KX999251        |
| <i>Diaporthe ellipicola</i>       | CGMCC 3.17084*    | <i>Lithocarpus glaber</i>        | China          | KF576270        | KF576245        | KF576294        | –        | –        | –        | –        | –               | –               |
| <i>Diaporthe ellipsospora</i>     | GZCC 19-0231*     | decaying woody host              | Guizhou, China | MT385949        | MT424684        | MT424704        | –        | –        | –        | –        | MT424720        | MW022488        |
| <i>Diaporthe endophytica</i>      | CBS 133811*       | <i>Schinus terebinthifolius</i>  | Brazil         | KC343065        | KC343791        | KC344033        | –        | –        | –        | –        | KC343307        | KC343549        |
| <i>Diaporthe eres</i>             | AR5193*           | <i>Ulmus sp.</i>                 | Germany        | KJ210529        | KJ210550        | KJ420799        | –        | –        | –        | –        | KJ434999        | KJ420850        |
| <i>Diaporthe eres</i>             | CFCC 52575        | <i>Castanea mollissima</i>       | China          | MH121510        | MH121552        | MH121592        | –        | –        | –        | –        | –               | MH121470        |
| <i>Diaporthe eres</i>             | CFCC 52576        | <i>Castanea mollissima</i>       | China          | MH121511        | MH121553        | MH121593        | –        | –        | –        | –        | MH121432        | MH121471        |
| <i>Diaporthe eres</i>             | CFCC 52577        | <i>Acanthopanax senticosus</i>   | China          | MH121512        | MH121554        | MH121594        | –        | –        | –        | –        | MH121433        | MH121472        |
| <i>Diaporthe eres</i>             | CFCC 52578        | <i>Sorbus sp.</i>                | China          | MH121513        | MH121555        | MH121595        | –        | –        | –        | –        | MH121433        | MH121473        |
| <i>Diaporthe eres</i>             | CFCC 52579        | <i>Juglans regia</i>             | China          | MH121514        | MH121556        | –               | –        | –        | –        | –        | –               | MH121474        |
| <i>Diaporthe eres</i>             | CFCC 52580        | <i>Melia azedarace</i>           | China          | MH121515        | MH121557        | MH121596        | –        | –        | –        | –        | –               | MH121475        |
| <i>Diaporthe eres</i>             | CFCC 52581        | <i>Rhododendron simsii</i>       | China          | MH121516        | MH121558        | MH121597        | –        | –        | –        | –        | –               | MH121476        |
| <b><i>Diaporthe eres</i></b>      | <b>CFCC 55481</b> | <b><i>Euonymus japonicus</i></b> | <b>China</b>   | <b>OQ344760</b> | <b>OQ410592</b> | <b>OQ410595</b> | <b>–</b> | <b>–</b> | <b>–</b> | <b>–</b> | <b>OQ410586</b> | <b>OQ410589</b> |

|                                        |                 |                                  |           |          |          |          |   |   |   |   |          |          |
|----------------------------------------|-----------------|----------------------------------|-----------|----------|----------|----------|---|---|---|---|----------|----------|
| <i>Diaporthe eres</i>                  | CFCC 55482      | <i>Euonymus japonicus</i>        | China     | OQ344761 | OQ410593 | OQ410596 | – | – | – | – | OQ410587 | OQ410590 |
| <i>Diaporthe eres</i>                  | CFCC 55534      | <i>Euonymus japonicus</i>        | China     | OQ344762 | OQ410594 | OQ410597 | – | – | – | – | OQ410588 | OQ410591 |
| <i>Diaporthe eucalyptorum</i>          | CBS 132525*     | <i>Eucalyptus</i> sp.            | China     | MH305525 | –        | –        | – | – | – | – | –        | –        |
| <i>Diaporthe foeniculacea</i>          | CBS 111553      | <i>Foeniculum vulgare</i>        | Spain     | MH854926 | KC343827 | KC344069 | – | – | – | – | KC343343 | KC343585 |
| <i>Diaporthe foikelawen</i>            | CBS 145189      | <i>Drimys winteri</i>            | Chile     | MN509713 | MN509735 | MN509724 | – | – | – | – | MN974278 | –        |
| <i>Diaporthe fraxini-angustifoliae</i> | BRIP 54781*     | <i>Fraxinus angustifolia</i>     | Australia | JX862528 | JX862534 | –        | – | – | – | – | KT459462 | –        |
| <i>Diaporthe fraxinicola</i>           | CFCC 52582*     | <i>Fraxinus chinensis</i>        | China     | MH121517 | MH121560 | –        | – | – | – | – | MH121435 | –        |
| <i>Diaporthe fraxinicola</i>           | CFCC 52583      | <i>Fraxinus chinensis</i>        | China     | MH121518 | MH121559 | –        | – | – | – | – | MH121436 | –        |
| <i>Diaporthe fructicola</i>            | MAFF 246408*    | <i>Passiflora edulis</i>         | Japan     | LC342734 | LC342735 | LC342736 | – | – | – | – | LC342738 | LC342737 |
| <i>Diaporthe fukushii</i>              | MAFF 625034     | <i>Pyrus pyrifolia</i>           | Japan     | –        | –        | KJ420819 | – | – | – | – | KJ435023 | KJ420868 |
| <i>Diaporthe fulvicolor</i>            | PSCG 051*       | <i>Pyrus pyrifolia</i>           | China     | MK626859 | MK654806 | MK691236 | – | – | – | – | MK691132 | MK726163 |
| <i>Diaporthe fusicola</i>              | CGMCC 3.17087   | <i>Lithocarpus glabra</i>        | China     | KF576281 | KF576256 | KF576305 | – | – | – | – | KF576233 | –        |
| <i>Diaporthe ganjae</i>                | CBS 180.91*     | <i>Cannabis sativa</i>           | USA       | KC343112 | KC343838 | KC344080 | – | – | – | – | KC343354 | KC343596 |
| <i>Diaporthe ganzhouensis</i>          | CFCC 53087      | Unknown                          | China     | MK432665 | MK578139 | MK578065 | – | – | – | – | MK442985 | MK443010 |
| <i>Diaporthe ganzhouensis</i>          | CFCC 53088      | Unknown                          | China     | MK432666 | MK578140 | MK578066 | – | – | – | – | MK442986 | MK443011 |
| <i>Diaporthe garethjonesii</i>         | MFLUCC 12-0542a | Unknown                          | Thailand  | KT459423 | KT459457 | KT459441 | – | – | – | – | KT459470 | –        |
| <i>Diaporthe goulteri</i>              | BRIP 55657a*    | <i>Helianthus annuus</i>         | Australia | KJ197290 | KJ197252 | KJ197270 | – | – | – | – | –        | –        |
| <i>Diaporthe grandiflori</i>           | SAUCC194.84*    | <i>Heterostemma grandiflorum</i> | China     | MT822612 | MT855809 | MT855924 | – | – | – | – | MT855691 | MT855580 |
| <i>Diaporthe guangxiensis</i>          | JZB320087*      | <i>Vitis vinifera</i>            | China     | MK335765 | MK523560 | MK500161 | – | – | – | – | MK736720 | –        |
| <i>Diaporthe gulyae</i>                | BRIP 54025*     | <i>Helianthus annuus</i>         | Australia | –        | JN645803 | KJ197271 | – | – | – | – | –        | –        |
| <i>Diaporthe guttulata</i>             | CGMCC 3.20100*  | Unknown                          | China     | MT385950 | MT424685 | MT424705 | – | – | – | – | MW022470 | MW022491 |
| <i>Diaporthe helianthi</i>             | CBS 592.81*     | <i>Helianthus annuus</i>         | Serbia    | KC343115 | KC343841 | KC344083 | – | – | – | – | KC343357 | KC343599 |
| <i>Diaporthe helicis</i>               | AR5211*         | <i>Hedera helix</i>              | France    | KJ210538 | KJ210559 | KJ420828 | – | – | – | – | KJ435043 | KJ420875 |

|                                  |                |                                  |           |          |          |          |   |   |   |   |          |          |
|----------------------------------|----------------|----------------------------------|-----------|----------|----------|----------|---|---|---|---|----------|----------|
| <i>Diaporthe heliconiae</i>      | SAUCC194.77*   | <i>Heliconia metallica</i>       | China     | MT822605 | MT855802 | MT855917 | – | – | – | – | MT855684 | MT855573 |
| <i>Diaporthe heterophyllae</i>   | CPC 26215      | <i>Acacia heterophylla</i>       | France    | MG600222 | MG600224 | MG600226 | – | – | – | – | MG600218 | MG600220 |
| <i>Diaporthe heterostemmatis</i> | SAUCC194.85*   | <i>Heterostemma grandiflorum</i> | China     | MT822613 | MT855810 | MT855925 | – | – | – | – | MT855692 | MT855581 |
| <i>Diaporthe hickoriae</i>       | CBS 145.26*    | <i>Carya glabra</i>              | USA       | KC343118 | KC343844 | KC344086 | – | – | – | – | KC343360 | –        |
| <i>Diaporthe hispaniae</i>       | CBS 143351*    | <i>Vitis vinifera</i>            | Spain     | MG281123 | MG281644 | MG281296 | – | – | – | – | MG281820 | MG281471 |
| <i>Diaporthe hongkongensis</i>   | CBS 115448*    | <i>Dichroa febrifuga</i>         | China     | MK304388 | KC343845 | KC344087 | – | – | – | – | KC343361 | KC343603 |
| <i>Diaporthe huairouensis</i>    | CFCC 56808     | <i>Corylus heterophylla</i>      | China     | ON188788 | ON158016 | ON158051 | – | – | – | – | ON157945 | ON157982 |
| <i>Diaporthe huairouensis</i>    | CFCC 56809     | <i>Corylus heterophylla</i>      | China     | OM956120 | ON158015 | ON158050 | – | – | – | – | ON157946 | ON157981 |
| <i>Diaporthe hubeiensis</i>      | JZB320123*     | <i>Vitis vinifera</i>            | China     | MK335809 | MK523570 | MK500148 | – | – | – | – | MK500235 | –        |
| <i>Diaporthe incompleta</i>      | LC6754         | <i>Camellia sinensis</i>         | China     | KX986794 | KX999186 | KX999226 | – | – | – | – | KX999289 | KX999265 |
| <i>Diaporthe inconspicua</i>     | CBS 133813*    | <i>Maytenus ilicifolia</i>       | Brazil    | –        | KC343849 | KC344091 | – | – | – | – | KC343365 | KC343607 |
| <i>Diaporthe infecunda</i>       | CBS 133812*    | <i>Schinus terebinthifolius</i>  | Brazil    | KC343126 | KC343852 | KC344094 | – | – | – | – | KC343368 | KC343610 |
| <i>Diaporthe irregularis</i>     | CGMCC 3.20092* | Unknown                          | China     | MT385951 | MT424686 | MT424706 | – | – | – | – | MT424721 | –        |
| <i>Diaporthe isoberliniae</i>    | CPC 22549      | <i>Isoberlinia angolensis</i>    | Zambia    | KJ869190 | –        | KJ869245 | – | – | – | – | –        | –        |
| <i>Diaporthe juglandicola</i>    | CFCC 51134*    | <i>Juglans mandshurica</i>       | China     | KU985101 | KX024628 | KX024634 | – | – | – | – | KX024616 | KX024622 |
| <i>Diaporthe juglandicola</i>    | CFCC 51135     | <i>Juglans mandshurica</i>       | China     | KU985102 | KX024629 | KX024635 | – | – | – | – | KX024617 | KX024623 |
| <i>Diaporthe juglandigena</i>    | CFCC 52584     | <i>Juglans regia</i>             | China     | MH121519 | MH121561 | MH121598 | – | – | – | – | MH121437 | MH121477 |
| <i>Diaporthe juglandigena</i>    | CFCC 52585     | <i>Juglans regia</i>             | China     | MH121520 | MH121562 | MH121599 | – | – | – | – | MH121438 | MH121478 |
| <i>Diaporthe kadsurae</i>        | CFCC 52586*    | <i>Kadsura longipedunculata</i>  | China     | MH121521 | MH121563 | MH121600 | – | – | – | – | MH121439 | MH121479 |
| <i>Diaporthe kadsurae</i>        | CFCC 52587     | <i>Kadsura longipedunculata</i>  | China     | MH121522 | MH121564 | MH121601 | – | – | – | – | MH121440 | MH121480 |
| <i>Diaporthe kochmanii</i>       | BRIP 54033*    | <i>Helianthus annuus</i>         | Australia | –        | JN645809 | –        | – | – | – | – | –        | –        |
| <i>Diaporthe kongii</i>          | BRIP 54031*    | <i>Helianthus annuus</i>         | Australia | –        | –        | KJ197272 | – | – | – | – | –        | –        |

|                                |                 |                                    |              |          |          |          |   |   |   |   |          |          |
|--------------------------------|-----------------|------------------------------------|--------------|----------|----------|----------|---|---|---|---|----------|----------|
| <i>Diaporthe krabiensis</i>    | MFLUCC 17-2481* | <i>Bruguiera</i> sp.               | Unknown      | MN047101 | MN433215 | MN431495 | – | – | – | – | –        | –        |
| <i>Diaporthe lenispora</i>     | CGMCC 3.20101*  | Unknown                            | China        | MT385952 | MT424687 | MT424707 | – | – | – | – | MW022472 | MW022493 |
| <i>Diaporthe litchicola</i>    | BRIP 54900*     | <i>Litchi chinensis</i>            | Australia    | LC041036 | JX862539 | –        | – | – | – | – | –        | –        |
| <i>Diaporthe litchii</i>       | SAUCC194.22*    | <i>Litchi chinensis</i>            | China        | MT822550 | MT855747 | MT855863 | – | – | – | – | MT855635 | MT855519 |
| <i>Diaporthe lithocarpus</i>   | CGMCC 3.15175*  | <i>Lithocarpus glabra</i>          | China        | KC135104 | KC153095 | KF576311 | – | – | – | – | KF576235 | –        |
| <i>Diaporthe longicicola</i>   | CGMCC 3.17089*  | <i>Lithocarpus glabra</i>          | China        | KF576267 | KF576242 | KF576291 | – | – | – | – | –        | –        |
| <i>Diaporthe longicolla</i>    | FAU599          | <i>Glycine max</i>                 | USA          | KJ590728 | KJ590767 | KJ610883 | – | – | – | – | KJ612124 | KJ659188 |
| <i>Diaporthe longispora</i>    | CBS 194.36*     | <i>Ribes</i> sp.                   | Canada       | MH855769 | KC343861 | KC344103 | – | – | – | – | KC343377 | KC343619 |
| <i>Diaporthe lonicerae</i>     | MFLUCC 17-0963* | <i>Lonicera</i> sp.                | Italy        | KY964190 | KY964146 | KY964073 | – | – | – | – | KY964116 | –        |
| <i>Diaporthe lusitanicae</i>   | CBS 123212*     | <i>Foeniculum vulgare</i>          | Portugal     | MH863279 | KC343862 | KC344104 | – | – | – | – | KC343378 | KC343620 |
| <i>Diaporthe lutescens</i>     | SAUCC194.36*    | <i>Chrysaliidocarpus lutescens</i> | China        | MT822564 | MT855761 | MT855877 | – | – | – | – | MT855647 | MT855533 |
| <i>Diaporthe macadamiae</i>    | BRIP66526*      | <i>Macadamia</i> sp.               | Australia    | MN708230 | MN696528 | MN696539 | – | – | – | – | –        | –        |
| <i>Diaporthe machili</i>       | SAUCC194.111*   | <i>Machilus pingii</i>             | China        | MT822639 | MT855951 | MT855836 | – | – | – | – | MT855718 | MT855606 |
| <i>Diaporthe macintoshii</i>   | BRIP 55064a*    | <i>Rapistrum rugosum</i>           | Australia    | KJ197289 | KJ197251 | KJ197269 | – | – | – | – | –        | –        |
| <i>Diaporthe mahothocarpus</i> | CGMCC 3.15181   | <i>Lithocarpus glabra</i>          | China        | KC153096 | KC153087 | KF576312 | – | – | – | – | –        | –        |
| <i>Diaporthe malorum</i>       | CAA 734         | <i>Malus domestica</i>             | Portugal     | KY435638 | KY435627 | KY435668 | – | – | – | – | KY435658 | KY435648 |
| <i>Diaporthe marina</i>        | MFLU 17-2622    | NA                                 | Thailand     | MN047102 | –        | –        | – | – | – | – | –        | –        |
| <i>Diaporthe maritima</i>      | DAOM 695742*    | <i>Picea ruben</i>                 | Canada       | KU552025 | KU552023 | KU574615 | – | – | – | – | –        | –        |
| <i>Diaporthe masirevicii</i>   | BRIP 54256      | <i>Glycine max</i>                 | Australia    | KJ197277 | KJ197238 | KJ197256 | – | – | – | – | –        | –        |
| <i>Diaporthe mayteni</i>       | CBS 133185*     | <i>Maytenus ilicifolia</i>         | Brazil       | KC343139 | KC343865 | KC344107 | – | – | – | – | KC343381 | KC343623 |
| <i>Diaporthe maytenicola</i>   | CPC 21896*      | <i>Maytenus acuminata</i>          | South Africa | KF777157 | –        | KF777250 | – | – | – | – | –        | –        |
| <i>Diaporthe mediterranea</i>  | SAUCC194.111    | <i>Machilus pingii</i>             | China        | MT822639 | MT855836 | MT855951 | – | – | – | – | MT855718 | MT855606 |
| <i>Diaporthe melastomatis</i>  | SAUCC194.55*    | <i>Melastoma malabathricum</i>     | China        | MT822583 | MT855780 | MT855896 | – | – | – | – | MT855664 | MT855551 |
| <i>Diaporthe melonis</i>       | CBS 435.87      | <i>Glycine soja</i>                | Indonesia    | KC343141 | KC343867 | KC344109 | – | – | – | – | KC343383 | KC343625 |

|                                    |                |                                |           |          |          |          |   |   |   |   |          |          |
|------------------------------------|----------------|--------------------------------|-----------|----------|----------|----------|---|---|---|---|----------|----------|
| <i>Diaporthe middletonii</i>       | BRIP 54884e*   | <i>Rapistrum rugosum</i>       | Australia | KJ197286 | KJ197248 | KJ197266 | – | – | – | – | –        | –        |
| <i>Diaporthe minima</i>            | GZCC 19-0066*  | Unknown                        | China     | MT385953 | MT424688 | MT424708 | – | – | – | – | MT424722 | MW022496 |
| <i>Diaporthe minusculata</i>       | GZCC 19-0215*  | Unknown                        | China     | MT385957 | MT424692 | MT424712 | – | – | – | – | MW022475 | MW022499 |
| <i>Diaporthe miriciae</i>          | BRIP 54736j*   | <i>Helianthus annuus</i>       | Australia | KJ197282 | KJ197244 | KJ197262 | – | – | – | – | –        | –        |
| <i>Diaporthe momicola</i>          | MFLUCC 16-0113 | <i>Prunus persica</i>          | China     | KU557563 | KU557631 | KU55758  | – | – | – | – | –        | KU557611 |
| <i>Diaporthe multigutullata</i>    | CFCC 53095     | <i>Citrus maxima</i>           | China     | MK432645 | MK578121 | MK578048 | – | – | – | – | MK442967 | MK442992 |
| <i>Diaporthe multigutullata</i>    | CFCC 53096     | <i>Citrus maxima</i>           | China     | MK432646 | MK578122 | MK578049 | – | – | – | – | MK442968 | MK442993 |
| <i>Diaporthe musigena</i>          | CBS 129519*    | <i>Musa</i> sp.                | Australia | KC343143 | KC343869 | KC344111 | – | – | – | – | KC343385 | KC343267 |
| <i>Diaporthe myracrodrionis</i>    | URM7972*       | <i>Myracrodrion urundeuva</i>  | Unknown   | MK205289 | MK213408 | MK205291 | – | – | – | – | MK205290 | –        |
| <i>Diaporthe neilliae</i>          | CBS 144.27*    | <i>Spiraea</i> sp.             | USA       | KC343144 | KC343870 | KC344112 | – | – | – | – | KC343386 | KC343628 |
| <i>Diaporthe neoarctii</i>         | CBS 109490*    | <i>Ambrosia trifida</i>        | USA       | KC343145 | KC343871 | KC344113 | – | – | – | – | KC343387 | KC343629 |
| <i>Diaporthe neoraonikayaporum</i> | MFLUCC 14-1136 | <i>Tectona grandis</i>         | Thailand  | KU712449 | KU749369 | KU743988 | – | – | – | – | KU749356 | –        |
| <i>Diaporthe nobilis</i>           | CBS 587.79     | <i>Pinus parviflora</i> var    | Japan     | KC343153 | KC343879 | KC344121 | – | – | – | – | KC343395 | KC343637 |
| <i>Diaporthe nothofagi</i>         | BRIP 54801*    | <i>Nothofagus cunninghamii</i> | Australia | JX862530 | JX862536 | KF170922 | – | – | – | – | –        | –        |
| <i>Diaporthe novem</i>             | CBS 127269*    | <i>Glycine max</i>             | Croatia   | KC343155 | KC343881 | KC344123 | – | – | – | – | KC343397 | KC343639 |
| <i>Diaporthe ocoteae</i>           | CPC 26217*     | <i>Ocotea bullata</i>          | France    | KX228293 | –        | KX228388 | – | – | – | – | –        | –        |
| <i>Diaporthe oraccinii</i>         | LC3166*        | <i>Camellia sinensis</i>       | China     | KP267863 | KP267937 | KP293443 | – | – | – | – | –        | KP293517 |
| <i>Diaporthe ovalispora</i>        | ZJUD93         | <i>Citrus limon</i>            | China     | KJ490628 | KJ490507 | KJ490449 | – | – | – | – | –        | KJ490570 |
| <i>Diaporthe ovoicicola</i>        | CGMCC 3.17093  | <i>Lithocarpus glabra</i>      | China     | KF576265 | KF576240 | KF576289 | – | – | – | – | KF576223 | –        |
| <i>Diaporthe oxe</i>               | CBS 133186*    | <i>Maytenus ilicifolia</i>     | Brazil    | KC343164 | KC343890 | KC344132 | – | – | – | – | KC343406 | KC343648 |
| <i>Diaporthe padina</i>            | CFCC 52590*    | <i>Padus racemosa</i>          | China     | MH121525 | MH121567 | MH121604 | – | – | – | – | MH121443 | MH121483 |
| <i>Diaporthe padina</i>            | CFCC 52591     | <i>Padus racemosa</i>          | China     | MH121526 | MH121568 | MH121605 | – | – | – | – | MH121444 | MH121484 |
| <i>Diaporthe pandanicola</i>       | MFLUCC 17-0607 | Pandanaceae                    | Thailand  | MG646974 | –        | MG646930 | – | – | – | – | –        | –        |
| <i>Diaporthe paranensis</i>        | CBS 133184*    | <i>Maytenus ilicifolia</i>     | Brazil    | KC343171 | KC343897 | KC344139 | – | – | – | – | KC343413 | KC343655 |

|                                        |                  |                                |                    |          |          |          |   |   |   |   |          |          |
|----------------------------------------|------------------|--------------------------------|--------------------|----------|----------|----------|---|---|---|---|----------|----------|
| <i>Diaporthe parapterocarpi</i>        | CBS 137986       | <i>Pterocarpus brenanii</i>    | Zambia             | KJ869138 | –        | KJ869248 | – | – | – | – | –        | –        |
| <i>Diaporthe parvae</i>                | PSCG 035         | <i>Pyrus bretschneideri</i>    | China              | MK626920 | MK654859 | MK691249 | – | – | – | – | MK691169 | MK726211 |
| <i>Diaporthe pascoei</i>               | BRIP 54847*      | <i>Persea americana</i>        | Australia          | MK111097 | JX862538 | KF170924 | – | – | – | – | –        | –        |
| <i>Diaporthe passiflorae</i>           | CPC 19183        | <i>Passiflora edulis</i>       | Netherlands        | JX069860 | –        | –        | – | – | – | – | –        | –        |
| <i>Diaporthe passifloricola</i>        | CPC 27480*       | <i>Passiflora foetida</i>      | Malaysia           | KX228292 | –        | KX228387 | – | – | – | – | –        | KX228367 |
| <i>Diaporthe penetrитеum</i>           | LC3215           | <i>Camellia sinensis</i>       | China              | KP267879 | KP293532 | KP267953 | – | – | – | – | –        | –        |
| <i>Diaporthe perijuncta</i>            | CBS 109745*      | <i>Ulmus glabra</i>            | Austria            | KC343172 | KC343898 | KC344140 | – | – | – | – | KC343414 | KC343656 |
| <i>Diaporthe perseae</i>               | CBS 151.73       | <i>Persea gratissima</i>       | Netherlands        | KC343173 | –        | –        | – | – | – | – | KC343415 | –        |
| <i>Diaporthe pescicola</i>             | MFLUCC 16-0105   | <i>Prunus persica</i>          | China              | KU557555 | KY400831 | KU557579 | – | – | – | – | KU557603 | –        |
| <i>Diaporthe phaseolorum</i>           | AR4203*          | <i>Phaseolus vulgaris</i>      | USA                | KJ590738 | KJ590739 | KJ610893 | – | – | – | – | KJ612135 | KJ659220 |
| <i>Diaporthe phillipsii</i>            | CAA 817          | <i>Vaccinium corymbosum</i>    | Portugal           | MK792305 | MK828076 | MN000351 | – | – | – | – | MK883831 | MK871445 |
| <i>Diaporthe pimpinellae</i>           | JZB320131*       | <i>Pimpinella peregrine</i>    | Italy              | MK874656 | MT373074 | MT373072 | – | – | – | – | –        | MT373073 |
| <i>Diaporthe podocarpi-macrophylli</i> | LC6155           | <i>Podocarpus macrophyllus</i> | Japan              | KX986774 | KX999167 | KX999207 | – | – | – | – | KX999278 | KX999246 |
| <i>Diaporthe pometiae</i>              | SAUCC194.72*     | <i>Pometia pinnata</i>         | China              | MT822600 | MT855797 | MT855912 | – | – | – | – | MT855679 | MT855568 |
| <i>Diaporthe pseudoalnea</i>           | CFCC 54190*      | <i>Alnus glutinosa</i>         | Netherlands        | MZ727037 | MZ816343 | MZ753487 | – | – | – | – | MZ753468 | MZ781302 |
| <i>Diaporthe pseudomangiferae</i>      | CBS 101339*      | <i>Mangifera indica</i>        | Dominican Republic | KC343181 | KC343907 | KC344149 | – | – | – | – | KC343423 | KC343665 |
| <i>Diaporthe pseudophoenicicola</i>    | CBS 176.77       | <i>Mangifera indica</i>        | Iraq               | KC343183 | KC343909 | KC344151 | – | – | – | – | KC343425 | KC343667 |
| <i>Diaporthe pseudotsugae</i>          | MFLU 15-3228*    | <i>Pseudotsuga menziesii</i>   | Italy              | KY964225 | KY964181 | KY964108 | – | – | – | – | KY964138 | –        |
| <i>Diaporthe psoraleae</i>             | CPC 21634        | <i>Psoralea pinnata</i>        | South Africa       | KF777158 | KF777245 | KF777251 | – | – | – | – | –        | –        |
| <i>Diaporthe psoraleae-pinnatae</i>    | CPC 21638*       | <i>Psoralea pinnata</i>        | South Africa       | KF777159 | –        | KF777252 | – | – | – | – | –        | –        |
| <i>Diaporthe pterocarpi</i>            | MFLUCC 10-0571*  | <i>Pterocarpus indicus</i>     | Thailand           | JQ619899 | JX275416 | JX275460 | – | – | – | – | JX197451 | –        |
| <i>Diaporthe pterocarpicola</i>        | MFLUCC 10-0580a* | <i>Pterocarpus indicus</i>     | Thailand           | JQ619887 | JX275403 | JX275441 | – | – | – | – | JX197433 | –        |

|                                     |                    |                                 |                   |          |          |          |   |   |   |   |          |          |
|-------------------------------------|--------------------|---------------------------------|-------------------|----------|----------|----------|---|---|---|---|----------|----------|
| <i>Diaporthe pulla</i>              | CBS 338.89*        | <i>Hedera helix</i>             | Yugoslavia        | KC343152 | KC343878 | KC344120 | – | – | – | – | KC343394 | KC343636 |
| <i>Diaporthe pungensis</i>          | SAUCC194.112*      | <i>Elaeagnus pungens</i>        | China             | MT822640 | MT855837 | MT855952 | – | – | – | – | MT855719 | MT855607 |
| <i>Diaporthe pyracanthae</i>        | CAA483             | <i>Pyracantha coccinea</i>      | Portugal          | KY435635 | KY435625 | KY435666 | – | – | – | – | KY435645 | KY435656 |
| <i>Diaporthe racemosae</i>          | CPC 26646          | <i>Euclea racemosa</i>          | South Africa      | MG600223 | MG600225 | MG600227 | – | – | – | – | MG600219 | MG600221 |
| <i>Diaporthe<br/>raonikayaporum</i> | CBS 133182         | <i>Spondias mombin</i>          | Brazil            | KC343188 | KC343914 | KC344156 | – | – | – | – | KC343430 | KC343672 |
| <i>Diaporthe ravennica</i>          | MFLUCC 16-<br>0997 | <i>Clematis vitalba</i>         | Italy             | –        | MT394670 | –        | – | – | – | – | –        | –        |
| <i>Diaporthe rhusicola</i>          | CPC 18191          | <i>Rhus pendulina</i>           | South Africa      | JF951146 | –        | –        | – | – | – | – | –        | –        |
| <i>Diaporthe rosae</i>              | MFLUCC 17-<br>2658 | <i>Rosa</i> sp.                 | United<br>Kingdom | MG828894 | –        | MG843878 | – | – | – | – | MG829273 | –        |
| <i>Diaporthe rosicola</i>           | MFLU 17-0646*      | <i>Rosa</i> sp.                 | United<br>Kingdom | MG828895 | MG829270 | MG843877 | – | – | – | – | MG829274 | –        |
| <i>Diaporthe rosiphthora</i>        | COAD 2914*         | <i>Rosa</i> sp.                 | Brazil            | MT311197 | MT313693 | –        | – | – | – | – | MT313691 | –        |
| <i>Diaporthe rossmaniae</i>         | CAA 762*           | <i>Vaccinium corymbosum</i>     | Portugal          | MK792290 | MK828063 | MK837914 | – | – | – | – | MK883822 | MK871432 |
| <i>Diaporthe rostrata</i>           | CFCC 50062*        | <i>Juglans mandshurica</i>      | China             | KP208847 | KP208853 | KP208855 | – | – | – | – | KP208849 | KP208851 |
| <i>Diaporthe rostrata</i>           | CFCC 50063         | <i>Juglans mandshurica</i>      | China             | KP208848 | KP208854 | KP208856 | – | – | – | – | KP208850 | KP208852 |
| <i>Diaporthe rudis</i>              | AR3422*            | <i>Laburnum anagyroides</i>     | Austria           | KC843331 | KC843090 | KC843177 | – | – | – | – | KC843146 | –        |
| <i>Diaporthe saccharata</i>         | CBS 116311*        | <i>Protea repens</i>            | South Africa      | KC343190 | KC343916 | KC344158 | – | – | – | – | KC343432 | KC343674 |
| <i>Diaporthe sackstonii</i>         | BRIP 54669b*       | <i>Helianthus annuus</i>        | Australia         | KJ197287 | KJ197249 | KJ197267 | – | – | – | – | –        | –        |
| <i>Diaporthe salicicola</i>         | BRIP 54825*        | <i>Salix purpurea</i>           | Australia         | JX862531 | JX862537 | KF170923 | – | – | – | – | –        | –        |
| <i>Diaporthe sambucusii</i>         | CFCC 51986*        | <i>Sambucus williamsii</i>      | China             | KY852495 | KY852507 | KY852511 | – | – | – | – | KY852499 | KY852503 |
| <i>Diaporthe sambucusii</i>         | CFCC 51987         | <i>Sambucus williamsii</i>      | China             | KY852496 | KY852508 | KY852512 | – | – | – | – | KY852500 | KY852504 |
| <i>Diaporthe schimae</i>            | CFCC 53103         | <i>Schima superba</i>           | China             | MK442640 | MK578116 | MK578043 | – | – | – | – | MK442962 | MK442987 |
| <i>Diaporthe schimae</i>            | CFCC 53104         | <i>Schima superba</i>           | China             | MK442641 | MK578117 | MK578044 | – | – | – | – | MK442963 | MK442988 |
| <i>Diaporthe schimae</i>            | CFCC 53105         | <i>Schima superba</i>           | China             | MK442642 | MK578118 | MK578045 | – | – | – | – | MK442964 | MK442989 |
| <i>Diaporthe schini</i>             | CBS 133181*        | <i>Schinus terebinthifolius</i> | Brazil            | KC343191 | KC343917 | KC344159 | – | – | – | – | KC343433 | KC343675 |
| <i>Diaporthe schisandrae</i>        | CFCC 51988*        | <i>Schisandra chinensis</i>     | China             | KY852497 | KY852509 | KY852513 | – | – | – | – | KY852501 | KY852505 |
| <i>Diaporthe schisandrae</i>        | CFCC 51989         | <i>Schisandra chinensis</i>     | China             | KY852498 | KY852510 | KY852514 | – | – | – | – | KY852502 | KY852506 |

|                                   |                 |                                 |              |          |          |          |   |   |   |   |          |          |
|-----------------------------------|-----------------|---------------------------------|--------------|----------|----------|----------|---|---|---|---|----------|----------|
| <i>Diaporthe schoeni</i>          | MFLU 15-1279*   | <i>Schoenus nigricans</i>       | Italy        | KY964226 | KY964182 | KY964109 | – | – | – | – | KY964139 | –        |
| <i>Diaporthe sclerotiioides</i>   | CBS 296.67      | <i>Cucumis sativus</i>          | Netherlands  | MH858974 | KC343919 | KC344161 | – | – | – | – | KC343435 | KC343677 |
| <i>Diaporthe searlei</i>          | BRIP 66528*     | <i>Macadamia</i> sp.            | Australia    | MN708231 | –        | MN696540 | – | – | – | – | –        | –        |
| <i>Diaporthe sennae</i>           | CFCC 51636*     | <i>Senna bicapsularis</i>       | China        | KY203724 | KY228885 | KY228891 | – | – | – | – | KY228875 | –        |
| <i>Diaporthe sennae</i>           | CFCC 51637      | <i>Senna bicapsularis</i>       | China        | KY203725 | KY228886 | KY228892 | – | – | – | – | KY228876 | –        |
| <i>Diaporthe sennicola</i>        | CFCC 51634*     | <i>Senna bicapsularis</i>       | China        | KY203722 | KY228883 | KY228889 | – | – | – | – | KY228873 | KY228879 |
| <i>Diaporthe sennicola</i>        | CFCC 51635      | <i>Senna bicapsularis</i>       | China        | KY203723 | KY228884 | KY228890 | – | – | – | – | KY228874 | KY228880 |
| <i>Diaporthe serafiniae</i>       | BRIP 55665a*    | <i>Helianthus annuus</i>        | Australia    | KJ197274 | KJ197236 | KJ197254 | – | – | – | – | –        | –        |
| <i>Diaporthe shaanxiensis</i>     | CFCC 53106      | <i>Liana</i> sp.                | China        | MK432654 | MK578130 | –        | – | – | – | – | MK442976 | MK443001 |
| <i>Diaporthe shaanxiensis</i>     | CFCC 53107      | <i>Liana</i> sp.                | China        | MK432655 | MK578131 | –        | – | – | – | – | MK432977 | MK432002 |
| <i>Diaporthe siamensis</i>        | MFLUCC 10-0573a | <i>Dasymaschalon</i> sp.        | Thailand     | –        | JX275393 | JX275429 | – | – | – | – | JQ619897 | –        |
| <i>Diaporthe silvicola</i>        | CFCC 54191*     | <i>Fraxinus excelsior</i>       | Netherlands  | MZ727041 | MZ816347 | MZ753491 | – | – | – | – | MZ753472 | MZ753481 |
| <i>Diaporthe sojae</i>            | FAU635*         | <i>Glycine max</i>              | USA          | KJ590719 | KJ590762 | KJ610875 | – | – | – | – | KJ612116 | KJ659208 |
| <i>Diaporthe spartinicola</i>     | CPC 24951       | <i>Spartium junceum</i>         | Spain        | KR611879 | –        | KR857695 | – | – | – | – | –        | KR857696 |
| <i>Diaporthe spinosa</i>          | PSCG 383*       | <i>Pyrus pyrifolia</i>          | China        | MK626849 | MK654811 | MK691234 | – | – | – | – | MK691129 | MK726156 |
| <i>Diaporthe sterilis</i>         | CBS 136969*     | <i>Vaccinium corymbosum</i>     | Italy        | KJ160579 | KJ160611 | KJ160528 | – | – | – | – | KJ160548 | MF418350 |
| <i>Diaporthe stictica</i>         | CBS 370.54      | <i>Buxus sempervirens</i>       | Italy        | KC343212 | KC343938 | KC344180 | – | – | – | – | KC343454 | KC343696 |
| <i>Diaporthe subclavata</i>       | ZJUD95          | <i>Citrus unshiu</i>            | China        | KJ490630 | KJ490509 | KJ490451 | – | – | – | – | –        | KJ490572 |
| <i>Diaporthe subcylindrospora</i> | KUMCC 17-0151   | Unknown                         | China        | MG746629 | MG746630 | MG746631 | – | – | – | – | –        | –        |
| <i>Diaporthe subellipicola</i>    | KUMCC 17-0153   | Unknown                         | China        | MG746632 | MG746633 | MG746634 | – | – | – | – | –        | –        |
| <i>Diaporthe subordinaria</i>     | CBS 464.90      | <i>Plantago lanceolata</i>      | South Africa | KC343214 | KC343940 | KC344182 | – | – | – | – | KC343456 | KC343698 |
| <i>Diaporthe taoicola</i>         | MFLUCC 16-0117  | <i>Prunus persica</i>           | China        | KU557567 | KU557636 | KU557591 | – | – | – | – | –        | –        |
| <i>Diaporthe tarchonanathi</i>    | CBS 146073*     | <i>Tarchonanthus littoralis</i> | South Africa | MT223794 | MT223759 | MT223733 | – | – | – | – | –        | –        |
| <i>Diaporthe tectonae</i>         | MFLUCC 12-0777  | <i>Tectona grandis</i>          | Thailand     | KU712430 | KU749359 | KU743977 | – | – | – | – | KU749345 | –        |

|                                    |                  |                                 |           |          |          |          |   |   |   |   |          |          |
|------------------------------------|------------------|---------------------------------|-----------|----------|----------|----------|---|---|---|---|----------|----------|
| <i>Diaporthe tectonendophytica</i> | MFLUCC 13-0471   | <i>Tectona grandis</i>          | Thailand  | KU712439 | KU749367 | KU743986 | – | – | – | – | KU749354 | –        |
| <i>Diaporthe tectonigena</i>       | MFLUCC 12-0767   | <i>Camellia sinensis</i>        | China     | KX986782 | KX999174 | KX999214 | – | – | – | – | KX999284 | KX999254 |
| <i>Diaporthe terebinthifolii</i>   | CBS 133180*      | <i>Schinus terebinthifolius</i> | Brazil    | KC343216 | KC343942 | KC344184 | – | – | – | – | KC343458 | KC343700 |
| <i>Diaporthe ternstroemia</i>      | CGMCC 3.15183    | <i>Ternstroemia gymnanthera</i> | China     | KC153098 | KC153089 | –        | – | – | – | – | –        | –        |
| <i>Diaporthe thunbergii</i>        | MFLUCC 10-0576a* | <i>Thunbergia laurifolia</i>    | Thailand  | JQ619893 | JX275409 | –        | – | – | – | – | JX197440 | –        |
| <i>Diaporthe thunbergiicola</i>    | MFLUCC 12-0033*  | <i>Thunbergia laurifolia</i>    | Thailand  | KP715097 | KP715098 | –        | – | – | – | – | –        | –        |
| <i>Diaporthe tibetensis</i>        | CFCC 51999*      | <i>Juglandis regia</i>          | China     | MF279843 | MF279858 | MF279873 | – | – | – | – | MF279888 | MF279828 |
| <i>Diaporthe tibetensis</i>        | CFCC 52000       | <i>Juglandis regia</i>          | China     | MF279844 | MF279859 | MF279874 | – | – | – | – | MF279889 | MF279829 |
| <i>Diaporthe torilicola</i>        | MFLUCC 17-1051*  | <i>Torilis arvensis</i>         | Italy     | KY964212 | KY964168 | KY964096 | – | – | – | – | KY964127 | –        |
| <i>Diaporthe toxica</i>            | CBS 534.93*      | <i>Lupinus angustifolius</i>    | Australia | KC343220 | KC343946 | KC344188 | – | – | – | – | KC343462 | KC343704 |
| <i>Diaporthe tulliensis</i>        | BRIP 62248a      | <i>Theobroma cacao</i>          | Australia | KR936130 | KR936133 | KR936132 | – | – | – | – | –        | –        |
| <i>Diaporthe ueckerae</i>          | FAU656*          | <i>Cucumis melo</i>             | USA       | KJ590726 | KJ590747 | KJ610881 | – | – | – | – | KJ612122 | KJ659215 |
| <i>Diaporthe ukurunduensis</i>     | CFCC 52592*      | <i>Acer ukurunduense</i>        | China     | MH121527 | MH121569 | –        | – | – | – | – | MH121445 | MH121485 |
| <i>Diaporthe ukurunduensis</i>     | CFCC 52593       | <i>Acer ukurunduense</i>        | China     | MH121528 | MH121570 | –        | – | – | – | – | MH121446 | MH121486 |
| <i>Diaporthe undulata</i>          | LC6624           | Unknown                         | China     | KX986798 | KX999190 | KX999230 | – | – | – | – | –        | KX999269 |
| <i>Diaporthe unshiuensis</i>       | CFCC 52594       | <i>Carya illinoensis</i>        | China     | MH121529 | MH121571 | MH121606 | – | – | – | – | MH121447 | MH121487 |
| <i>Diaporthe unshiuensis</i>       | CFCC 52595       | <i>Carya illinoensis</i>        | China     | MH121530 | MH121572 | MH121607 | – | – | – | – | MH121448 | MH121488 |
| <i>Diaporthe vaccinii</i>          | CBS 160.32*      | <i>Oxycoccus macrocarpos</i>    | USA       | MH121502 | MH121544 | MH121584 | – | – | – | – | MH121426 | MH121462 |
| <i>Diaporthe vacuae</i>            | CAA830           | <i>Vaccinium corymbosum</i>     | Portugal  | MK792306 | MK828077 | MK837928 | – | – | – | – | MK883832 | MK871446 |
| <i>Diaporthe vangueriae</i>        | CBS 137985*      | <i>Vangueria infausta</i>       | Zambia    | KJ869137 | –        | KJ869247 | – | – | – | – | –        | –        |
| <i>Diaporthe vawdreyi</i>          | BRIP 57887a      | <i>Psidium guajava</i>          | Australia | KR936126 | KR936129 | KR936128 | – | – | – | – | –        | –        |
| <i>Diaporthe velutina</i>          | LC4421           | <i>Neolitsea</i> sp.            | China     | KX986790 | KX999182 | KX999223 | – | – | – | – | –        | KX999261 |
| <i>Diaporthe verniciicola</i>      | CFCC 53109       | <i>Vernicia montana</i>         | China     | MK573944 | MK574619 | MK574639 | – | – | – | – | MK574583 | MK574599 |
| <i>Diaporthe verniciicola</i>      | CFCC 53110       | <i>Vernicia montana</i>         | China     | MK573945 | MK574620 | MK574640 | – | – | – | – | MK574584 | MK574600 |

|                                       |                 |                                            |                 |          |          |          |   |   |   |   |          |          |
|---------------------------------------|-----------------|--------------------------------------------|-----------------|----------|----------|----------|---|---|---|---|----------|----------|
| <i>Diaporthe viniferae</i>            | JZB320071*      | <i>Vitis vinifera</i>                      | China           | MK341551 | MK500107 | MK500112 | – | – | – | – | MK500119 | –        |
| <i>Diaporthe virgiliae</i>            | CMW 40748       | <i>Virgilia oroboides</i>                  | South Africa    | KP247556 | –        | KP247575 | – | – | – | – | –        | –        |
| <i>Diaporthe xishuangbanica</i>       | LC6707          | <i>Camellia sinensis</i>                   | China           | KX986783 | KX999175 | KX999216 | – | – | – | – | –        | KX999255 |
| <i>Diaporthe xunwuensis</i>           | CFCC 53085      | Unknown                                    | China           | MK432663 | MK578137 | MK578063 | – | – | – | – | MK442983 | MK443008 |
| <i>Diaporthe xunwuensis</i>           | CFCC 53086      | Unknown                                    | China           | MK432664 | MK578138 | MK578064 | – | – | – | – | MK442984 | MK443009 |
| <i>Diaporthe yunnanensis</i>          | LC6168          | Unknown                                    | China           | KX986796 | KX999188 | KX999228 | – | – | – | – | KX999290 | KX999267 |
| <i>Diaporthe zaobaisu</i>             | PSCG 031*       | <i>Pyrus bretschneideri</i>                | China           | MK626922 | MK654855 | MK691245 | – | – | – | – | –        | MK726207 |
| <i>Diaporthella corylina</i>          | CBS 121124      | <i>Corylus</i> sp.                         | NA              | KC343004 | KC343730 | KC343972 | – | – | – | – | KC343246 | KC343488 |
| <i>Neopestalotiopsis magna</i>        | MFLUCC 12-0652* | <i>Pteridium</i> sp.                       | France          | KF582795 | KF582791 | KF582793 | – | – | – | – | –        | –        |
| <i>Pestalotiopsis abietis</i>         | CFCC 53011*     | <i>Abies fargesii</i>                      | China           | MK397013 | MK622277 | MK622280 | – | – | – | – | –        | –        |
| <i>Pestalotiopsis abietis</i>         | CFCC 53012      | <i>Abies fargesii</i>                      | China           | MK397014 | MK622278 | MK622281 | – | – | – | – | –        | –        |
| <i>Pestalotiopsis adusta</i>          | ICMP 6088*      | refrigerator door                          | Fiji            | JX399006 | JX399070 | JX399037 | – | – | – | – | –        | –        |
| <i>Pestalotiopsis adusta</i>          | MFLUCC 10-146   | <i>Syzygium</i> sp.                        | Thailand        | JX399007 | JX399071 | JX399038 | – | – | – | – | –        | –        |
| <i>Pestalotiopsis aggestorum</i>      | LC6301*         | <i>Camellia sinensis</i>                   | China           | KX895015 | KX895234 | KX895348 | – | – | – | – | –        | –        |
| <i>Pestalotiopsis aggestorum</i>      | LC8186          | <i>Camellia sinensis</i>                   | China           | KY464140 | KY464150 | KY464160 | – | – | – | – | –        | –        |
| <i>Pestalotiopsis anacardiacearum</i> | IFRDCC 2397*    | <i>Mangifera indica</i>                    | China           | KC247154 | KC247156 | KC247155 | – | – | – | – | –        | –        |
| <i>Pestalotiopsis anhuiensis</i>      | CFCC 54791*     | <i>Cyclobalanopsis glauca</i>              | China           | ON007028 | ON005045 | ON005056 | – | – | – | – | –        | –        |
| <i>Pestalotiopsis arceuthobii</i>     | CBS 434.65*     | <i>Arceuthobium campylopodum</i>           | USA             | KM199341 | KM199516 | KM199427 | – | – | – | – | –        | –        |
| <i>Pestalotiopsis arenga</i>          | CBS 331.92*     | <i>Arenga undulatifolia</i>                | Singapore       | KM199340 | KM199515 | KM199426 | – | – | – | – | –        | –        |
| <i>Pestalotiopsis australasiae</i>    | CBS 114126*     | <i>Knightia</i> sp.                        | New Zealand     | KM199297 | KM199499 | KM199409 | – | – | – | – | –        | –        |
| <i>Pestalotiopsis australasiae</i>    | CBS 114141      | <i>Protea</i> sp.                          | New South Wales | KM199298 | KM199501 | KM199410 | – | – | – | – | –        | –        |
| <i>Pestalotiopsis australis</i>       | CBS 111503      | <i>Protea neriifolia</i> × <i>susannae</i> | South Africa    | KM199331 | KM199557 | KM199382 | – | – | – | – | –        | –        |
| <i>Pestalotiopsis australis</i>       | CBS 114193*     | <i>Grevillea</i> sp.                       | New South Wales | KM199332 | KM199475 | KM199383 | – | – | – | – | –        | –        |

|                                           |                 |                             |             |          |          |          |   |   |   |   |   |   |
|-------------------------------------------|-----------------|-----------------------------|-------------|----------|----------|----------|---|---|---|---|---|---|
| <i>Pestalotiopsis biciliata</i>           | CBS 124463*     | <i>Platanus × hispanica</i> | Slovakia    | KM199308 | KM199505 | KM199399 | – | – | – | – | – | – |
| <i>Pestalotiopsis biciliata</i>           | CBS 236.38      | <i>Paeonia</i> sp.          | Italy       | KM199309 | KM199506 | KM199401 | – | – | – | – | – | – |
| <i>Pestalotiopsis brachiata</i>           | LC2988*         | <i>Camellia</i> sp.         | China       | KX894933 | KX895150 | KX895265 | – | – | – | – | – | – |
| <i>Pestalotiopsis brachiata</i>           | LC8188          | <i>Camellia</i> sp.         | China       | KY464142 | KY464152 | KY464162 | – | – | – | – | – | – |
| <i>Pestalotiopsis brachiata</i>           | LC8189          | <i>Camellia</i> sp.         | China       | KY464143 | KY464153 | KY464163 | – | – | – | – | – | – |
| <i>Pestalotiopsis brassicae</i>           | CBS 170.26*     | <i>Brassica napus</i>       | New Zealand | KM199379 | KM199558 | –        | – | – | – | – | – | – |
| <i>Pestalotiopsis camelliae</i>           | MFLUCC 12-0277* | <i>Camellia japonica</i>    | China       | JX399010 | JX399074 | JX399041 | – | – | – | – | – | – |
| <i>Pestalotiopsis camelliae-oleiferae</i> | CSUFTCC08*      | <i>Camelliae oleiferae</i>  | China       | OK493593 | OK507963 | OK562368 | – | – | – | – | – | – |
| <i>Pestalotiopsis camelliae-oleiferae</i> | CSUFTCC09       | <i>Camelliae oleiferae</i>  | China       | OK493594 | OK507964 | OK562369 | – | – | – | – | – | – |
| <i>Pestalotiopsis castanopsidis</i>       | CFCC 54430*     | <i>Castanopsis lamontii</i> | China       | OK339732 | OK358493 | OK358508 | – | – | – | – | – | – |
| <i>Pestalotiopsis castanopsidis</i>       | CFCC 54305      | <i>Castanopsis hystrix</i>  | China       | OK339733 | OK358494 | OK358509 | – | – | – | – | – | – |
| <i>Pestalotiopsis castanopsidis</i>       | CFCC 54384      | <i>Castanopsis hystrix</i>  | China       | OK339734 | OK358495 | OK358510 | – | – | – | – | – | – |
| <i>Pestalotiopsis chamaeropsis</i>        | CBS 186.71*     | <i>Chamaerops humilis</i>   | Italy       | KM199326 | KM199473 | KM199391 | – | – | – | – | – | – |
| <i>Pestalotiopsis chamaeropsis</i>        | LC3619          | <i>Camellia</i> sp.         | China       | KX894991 | KX895208 | KX895322 | – | – | – | – | – | – |
| <i>Pestalotiopsis chamaeropsis</i>        | CFCC 55124      | <i>Quercus acutissima</i>   | China       | OM746221 | OM839993 | OM839894 | – | – | – | – | – | – |
| <i>Pestalotiopsis chamaeropsis</i>        | CFCC 54977      | <i>Quercus acutissima</i>   | China       | OM746223 | OM839995 | OM839896 | – | – | – | – | – | – |
| <i>Pestalotiopsis chamaeropsis</i>        | CFCC 55019      | <i>Quercus aliena</i>       | China       | OM746224 | OM839996 | OM839897 | – | – | – | – | – | – |
| <i>Pestalotiopsis chamaeropsis</i>        | CFCC 55122      | <i>Quercus aliena</i>       | China       | OM746229 | OM840001 | OM839902 | – | – | – | – | – | – |
| <i>Pestalotiopsis chamaeropsis</i>        | CFCC 55023      | <i>Castanopsis fissa</i>    | China       | OM746233 | OM840005 | OM839906 | – | – | – | – | – | – |

|                                            |                    |                                              |              |                 |                 |                 |   |   |   |   |   |   |
|--------------------------------------------|--------------------|----------------------------------------------|--------------|-----------------|-----------------|-----------------|---|---|---|---|---|---|
| <i>Pestalotiopsis chamaeropsis</i>         | CFCC 54776         | <i>Quercus variabilis</i>                    | China        | OM746234        | OM840006        | OM839907        | – | – | – | – | – | – |
| <i>Pestalotiopsis chamaeropsis</i>         | CFCC 55338         | <i>Quercus variabilis</i>                    | China        | OM746235        | OM840007        | OM839908        | – | – | – | – | – | – |
| <i>Pestalotiopsis changjiangensis</i>      | CFCC 54314*        | <i>Castanopsis tonkinensis</i>               | China        | OK339739        | OK358500        | OK358515        | – | – | – | – | – | – |
| <i>Pestalotiopsis changjiangensis</i>      | CFCC 54433         | <i>Castanopsis hainanensis</i>               | China        | OK339740        | OK358501        | OK358516        | – | – | – | – | – | – |
| <i>Pestalotiopsis changjiangensis</i>      | CFCC 52803         | <i>Cyclobalanopsis austrocochinchinensis</i> | China        | OK339741        | OK358502        | OK358517        | – | – | – | – | – | – |
| <b><i>Pestalotiopsis chaoyangensis</i></b> | <b>CFCC 55549*</b> | <b><i>Euonymus japonicus</i></b>             | <b>China</b> | <b>OQ344763</b> | <b>OQ410582</b> | <b>OQ410584</b> | – | – | – | – | – | – |
| <b><i>Pestalotiopsis chaoyangensis</i></b> | <b>CFCC 58805</b>  | <b><i>Euonymus japonicus</i></b>             | <b>China</b> | <b>OQ344764</b> | <b>OQ410583</b> | <b>OQ410585</b> | – | – | – | – | – | – |
| <i>Pestalotiopsis clavata</i>              | MFLUCC 12-0268*    | <i>Buxus</i> sp.                             | China        | JX398990        | JX399056        | JX399025        | – | – | – | – | – | – |
| <i>Pestalotiopsis colombiensis</i>         | CBS 118553*        | <i>Eucalyptus eurograndis</i>                | Colombia     | KM199307        | KM199488        | KM199421        | – | – | – | – | – | – |
| <i>Pestalotiopsis cyclobalanopsidis</i>    | CFCC 54328*        | <i>Cyclobalanopsis glauca</i>                | China        | OK339735        | OK358496        | OK358511        | – | – | – | – | – | – |
| <i>Pestalotiopsis cyclobalanopsidis</i>    | CFCC 55891         | <i>Cyclobalanopsis glauca</i>                | China        | OK339736        | OK358497        | OK358512        | – | – | – | – | – | – |
| <i>Pestalotiopsis digitalis</i>            | MFLU 14-0208*      | <i>Digitalis purpurea</i>                    | New Zealand  | KP781879        | –               | KP781883        | – | – | – | – | – | – |
| <i>Pestalotiopsis dilucida</i>             | LC3232             | <i>Camellia sinensis</i>                     | China        | KX894961        | KX895178        | KX895293        | – | – | – | – | – | – |
| <i>Pestalotiopsis dilucida</i>             | LC8184             | <i>Camellia sinensis</i>                     | China        | KY464138        | KY464148        | KY464158        | – | – | – | – | – | – |
| <i>Pestalotiopsis diploclisiae</i>         | CBS 115449         | <i>Psychotria tutcheri</i>                   | China        | KM199314        | KM199485        | KM199416        | – | – | – | – | – | – |
| <i>Pestalotiopsis diploclisiae</i>         | CBS 115587*        | <i>Diploclisia glaucescens</i>               | China        | KM199320        | KM199486        | KM199419        | – | – | – | – | – | – |
| <i>Pestalotiopsis disseminata</i>          | CBS 143904         | <i>Persea americana</i>                      | New Zealand  | MH554152        | MH554587        | MH554825        | – | – | – | – | – | – |
| <i>Pestalotiopsis disseminata</i>          | MEAN 1165          | <i>Pinus pinea</i>                           | Portugal     | MT374687        | MT374699        | MT374712        | – | – | – | – | – | – |
| <i>Pestalotiopsis diversiseta</i>          | MFLUCC 12-0287*    | <i>Rhododendron</i> sp.                      | China        | JX399009        | JX399073        | JX399040        | – | – | – | – | – | – |

|                                           |                     |                                 |             |          |          |          |   |   |   |   |   |   |
|-------------------------------------------|---------------------|---------------------------------|-------------|----------|----------|----------|---|---|---|---|---|---|
| <i>Pestalotiopsis<br/>doitungensis</i>    | MFLUCC 14-<br>0115* | <i>Dendrobium</i> sp.           | Thailand    | MK993574 | MK975832 | MK975837 | – | – | – | – | – | – |
| <i>Pestalotiopsis<br/>dracaenicola</i>    | MFLUCC 18-<br>0913* | <i>Dracaena</i> sp.             | Thailand    | MN962731 | MN962732 | MN962733 | – | – | – | – | – | – |
| <i>Pestalotiopsis<br/>dracontomelonis</i> | MFLU 14-0207*       | <i>Dracontomelon dao</i>        | Thailand    | KP781877 | KP781880 | –        | – | – | – | – | – | – |
| <i>Pestalotiopsis<br/>ericacearum</i>     | IFRDCC 2439*        | <i>Rhododendron delavayi</i>    | China       | KC537807 | KC537814 | KC537821 | – | – | – | – | – | – |
| <i>Pestalotiopsis<br/>etonensis</i>       | BRIP 66615*         | <i>Sporobolus jacquemontii</i>  | Australia   | MK966339 | MK977635 | MK977634 | – | – | – | – | – | – |
| <i>Pestalotiopsis<br/>formosana</i>       | NTUCC 17-009*       | <i>Poaceae</i> sp.              | China       | MH809381 | MH809389 | MH809385 | – | – | – | – | – | – |
| <i>Pestalotiopsis furcata</i>             | MFLUCC 12-<br>0054* | <i>Camellia sinensis</i>        | Thailand    | JQ683724 | JQ683740 | JQ683708 | – | – | – | – | – | – |
| <i>Pestalotiopsis furcata</i>             | LC6691              | <i>Camellia sinensis</i>        | China       | KX895030 | KX895248 | KX895363 | – | – | – | – | – | – |
| <i>Pestalotiopsis foliicola</i>           | CFCC 54440*         | <i>Castanopsis faberi</i>       | China       | ON007029 | ON005046 | ON005057 | – | – | – | – | – | – |
| <i>Pestalotiopsis foliicola</i>           | CFCC 57359          | <i>Castanopsis faberi</i>       | China       | ON007030 | ON005047 | ON005058 | – | – | – | – | – | – |
| <i>Pestalotiopsis foliicola</i>           | CFCC 57360          | <i>Castanopsis faberi</i>       | China       | ON007031 | ON005048 | ON005059 | – | – | – | – | – | – |
| <i>Pestalotiopsis<br/>gaultheriae</i>     | IFRD 411-014*       | <i>Gaultheria forrestii</i>     | China       | KC537805 | KC537812 | KC537819 | – | – | – | – | – | – |
| <i>Pestalotiopsis gibbosa</i>             | NOF 3175*           | <i>Gaultheria shallon</i>       | Canada      | LC311589 | LC311591 | LC311590 | – | – | – | – | – | – |
| <i>Pestalotiopsis<br/>grevilleae</i>      | CBS 114127*         | <i>Grevillea</i> sp.            | Australia   | KM199300 | KM199504 | KM199407 | – | – | – | – | – | – |
| <i>Pestalotiopsis<br/>guangxiensis</i>    | CFCC 54308*         | <i>Quercus griffithii</i>       | China       | OK339737 | OK358498 | OK358513 | – | – | – | – | – | – |
| <i>Pestalotiopsis<br/>guangxiensis</i>    | CFCC 54300          | <i>Quercus griffithii</i>       | China       | OK339738 | OK358499 | OK358514 | – | – | – | – | – | – |
| <i>Pestalotiopsis<br/>guizhouensis</i>    | CFCC 54803*         | <i>Cyclobalanopsis glauca</i>   | China       | ON007035 | ON005052 | ON005063 | – | – | – | – | – | – |
| <i>Pestalotiopsis<br/>guizhouensis</i>    | CFCC 57364          | <i>Cyclobalanopsis glauca</i>   | China       | ON007036 | ON005053 | ON005064 | – | – | – | – | – | – |
| <i>Pestalotiopsis<br/>hawaiiensis</i>     | CBS 114491*         | <i>Leucospermum</i> sp.         | USA         | KM199339 | KM199514 | KM199428 | – | – | – | – | – | – |
| <i>Pestalotiopsis<br/>hispanica</i>       | CBS 115391*         | <i>Protea</i> sp.               | Spain       | MH553981 | MH554399 | MH554640 | – | – | – | – | – | – |
| <i>Pestalotiopsis<br/>hollandica</i>      | CBS 265.33*         | <i>Sciadopitys verticillata</i> | Netherlands | KM199328 | KM199481 | KM199388 | – | – | – | – | – | – |

|                                      |                 |                                                   |                  |          |          |          |   |   |   |   |   |   |
|--------------------------------------|-----------------|---------------------------------------------------|------------------|----------|----------|----------|---|---|---|---|---|---|
| <i>Pestalotiopsis humicola</i>       | CBS 336.97*     | soil                                              | Papua New Guinea | KM199317 | KM199484 | KM199420 | – | – | – | – | – | – |
| <i>Pestalotiopsis hunanensis</i>     | CSUFTCC15*      | <i>Camellia oleifera</i>                          | China            | OK493599 | OK507969 | OK562374 | – | – | – | – | – | – |
| <i>Pestalotiopsis hunanensis</i>     | CSUFTCC18       | <i>Camellia oleifera</i>                          | China            | OK493600 | OK507970 | OK562375 | – | – | – | – | – | – |
| <i>Pestalotiopsis inflexa</i>        | MFLUCC 12-0270* | unidentified tree                                 | China            | JX399008 | JX399072 | JX399039 | – | – | – | – | – | – |
| <i>Pestalotiopsis intermedia</i>     | MFLUCC 12-0259* | unidentified tree                                 | China            | JX398993 | JX399059 | JX399028 | – | – | – | – | – | – |
| <i>Pestalotiopsis italiana</i>       | MFLU 14-0214*   | <i>Cupressus glabra</i>                           | Italy            | KP781878 | KP781881 | KP781882 | – | – | – | – | – | – |
| <i>Pestalotiopsis jesteri</i>        | CBS 109350*     | <i>Fragraea bodenii</i>                           | Papua New Guinea | KM199380 | KM199554 | KM199468 | – | – | – | – | – | – |
| <i>Pestalotiopsis jiangxiensis</i>   | LC4399*         | <i>Camellia</i> sp.                               | China            | KX895009 | KX895227 | KX895341 | – | – | – | – | – | – |
| <i>Pestalotiopsis jinchanghensis</i> | LC6636*         | <i>Camellia sinensis</i>                          | China            | KX895028 | KX895247 | KX895361 | – | – | – | – | – | – |
| <i>Pestalotiopsis jinchanghensis</i> | LC8190          | <i>Camellia sinensis</i>                          | China            | KY464144 | KY464154 | KY464164 | – | – | – | – | – | – |
| <i>Pestalotiopsis kaki</i>           | KNU-PT-1804*    | <i>Diospyros kaki</i>                             | Korea            | LC552953 | LC553555 | LC552954 | – | – | – | – | – | – |
| <i>Pestalotiopsis kandelicola</i>    | NCYU 19-0355*   | <i>Kandelia candel</i>                            | China            | MT560723 | MT563102 | MT563100 | – | – | – | – | – | – |
| <i>Pestalotiopsis kenyana</i>        | CBS 442.67*     | <i>Coffea</i> sp.                                 | Kenya            | KM199302 | KM199502 | KM199395 | – | – | – | – | – | – |
| <i>Pestalotiopsis kenyana</i>        | LC6633          | <i>Camellia sinensis</i>                          | China            | KX895027 | KX895246 | KX895360 | – | – | – | – | – | – |
| <i>Pestalotiopsis kenyana</i>        | CFCC 54962      | <i>Quercus aliena</i>                             | China            | OM746237 | OM840009 | OM839910 | – | – | – | – | – | – |
| <i>Pestalotiopsis kenyana</i>        | CFCC 55330      | <i>Cyclobalanopsis fleuryi</i>                    | China            | OM746238 | OM840010 | OM839911 | – | – | – | – | – | – |
| <i>Pestalotiopsis kenyana</i>        | CFCC 54621      | <i>Quercus aliena</i> var.<br><i>acutiserrata</i> | China            | OM746239 | OM840011 | OM839912 | – | – | – | – | – | – |
| <i>Pestalotiopsis kenyana</i>        | CFCC 54732      | <i>Cyclobalanopsis neglecta</i>                   | China            | OM746243 | OM840015 | OM839916 | – | – | – | – | – | – |
| <i>Pestalotiopsis kenyana</i>        | CFCC 54742      | <i>Castanopsis hystrix</i>                        | China            | OM746245 | OM840017 | OM839918 | – | – | – | – | – | – |
| <i>Pestalotiopsis kenyana</i>        | CFCC 54618      | <i>Quercus aliena</i> var.<br><i>acutiserrata</i> | China            | OM746248 | OM840020 | OM839921 | – | – | – | – | – | – |
| <i>Pestalotiopsis kenyana</i>        | CFCC 54805      | <i>Cyclobalanopsis glauca</i>                     | China            | OM746253 | OM840025 | OM839926 | – | – | – | – | – | – |
| <i>Pestalotiopsis kenyana</i>        | CFCC 55088      | <i>Castanopsis fissa</i>                          | China            | OM746254 | OM840026 | OM839927 | – | – | – | – | – | – |
| <i>Pestalotiopsis knightiae</i>      | CBS 111963      | <i>Knightia</i> sp.                               | New Zealand      | KM199311 | KM199495 | KM199406 | – | – | – | – | – | – |

|                                    |                 |                                                   |              |          |          |          |   |   |   |   |   |   |
|------------------------------------|-----------------|---------------------------------------------------|--------------|----------|----------|----------|---|---|---|---|---|---|
| <i>Pestalotiopsis knightiae</i>    | CBS 114138*     | <i>Knightia</i> sp.                               | New Zealand  | KM199310 | KM199497 | KM199408 | – | – | – | – | – | – |
| <i>Pestalotiopsis krabiensis</i>   | MFLUCC 16-0260* | <i>Pandanus</i> sp.                               | Thailand     | MH388360 | MH388395 | MH412722 | – | – | – | – | – | – |
| <i>Pestalotiopsis leucadendri</i>  | CBS 121417*     | <i>Leucadendron</i> sp.                           | South Africa | MH553987 | MH554412 | MH554654 | – | – | – | – | – | – |
| <i>Pestalotiopsis licualicola</i>  | HGUP 4057*      | <i>Licuala grandis</i>                            | China        | KC492509 | KC481684 | KC481683 | – | – | – | – | – | – |
| <i>Pestalotiopsis lijiangensis</i> | CFCC 50738*     | <i>Castanopsis carlesii</i> var. <i>spinulosa</i> | China        | KU860520 | KU844185 | KU844184 | – | – | – | – | – | – |
| <i>Pestalotiopsis linearis</i>     | MFLUCC 12-0271* | <i>Trachelospermum</i> sp.                        | China        | JX398992 | JX399058 | JX399027 | – | – | – | – | – | – |
| <i>Pestalotiopsis lithocarp</i>    | CFCC 55100*     | <i>Lithocarpus chiungchungensis</i>               | China        | OK339742 | OK358503 | OK358518 | – | – | – | – | – | – |
| <i>Pestalotiopsis lithocarp</i>    | CFCC 55893      | <i>Lithocarpus chiungchungensis</i>               | China        | OK339743 | OK358504 | OK358519 | – | – | – | – | – | – |
| <i>Pestalotiopsis lushanensis</i>  | LC4344*         | <i>Camellia</i> sp.                               | China        | KX895005 | KX895223 | KX895337 | – | – | – | – | – | – |
| <i>Pestalotiopsis lushanensis</i>  | LC8182          | <i>Camellia</i> sp.                               | China        | KY464136 | KY464146 | KY464156 | – | – | – | – | – | – |
| <i>Pestalotiopsis lushanensis</i>  | LC8183          | <i>Camellia</i> sp.                               | China        | KY464137 | KY464147 | KY464157 | – | – | – | – | – | – |
| <i>Pestalotiopsis lushanensis</i>  | CFCC 54894      | <i>Quercus serrata</i>                            | China        | OM746282 | OM840054 | OM839955 | – | – | – | – | – | – |
| <i>Pestalotiopsis macadamiae</i>   | BRIP 63738b     | <i>Macadamia integrifolia</i>                     | Australia    | KX186588 | KX186621 | KX186680 | – | – | – | – | – | – |
| <i>Pestalotiopsis macadamiae</i>   | BRIP 63739b     | <i>Macadamia integrifolia</i>                     | Australia    | KX186587 | KX186620 | KX186679 | – | – | – | – | – | – |
| <i>Pestalotiopsis macadamiae</i>   | BRIP 637441a    | <i>Macadamia integrifolia</i>                     | Australia    | KX186586 | KX186619 | KX186678 | – | – | – | – | – | – |
| <i>Pestalotiopsis malayana</i>     | CBS 102220*     | <i>Macaranga triloba</i>                          | Malaysia     | KM199306 | KM199482 | KM199411 | – | – | – | – | – | – |
| <i>Pestalotiopsis monochaeta</i>   | CBS 144.97*     | <i>Quercus robur</i>                              | Netherlands  | KM199327 | KM199479 | KM199386 | – | – | – | – | – | – |
| <i>Pestalotiopsis monochaeta</i>   | CBS 440.83      | <i>Taxus baccata</i>                              | Netherlands  | KM199329 | KM199480 | KM199387 | – | – | – | – | – | – |

|                                        |                 |                                   |                  |          |          |          |   |   |   |   |   |   |
|----------------------------------------|-----------------|-----------------------------------|------------------|----------|----------|----------|---|---|---|---|---|---|
| <i>Pestalotiopsis nanjingensis</i>     | CFCC 53882      | <i>Quercus aliena</i>             | China            | OM746295 | OM840067 | OM839968 | – | – | – | – | – | – |
| <i>Pestalotiopsis nanjingensis</i>     | CSUFTCC16*      | <i>Camellia oleifera</i>          | China            | OK493602 | OK507972 | OK562377 | – | – | – | – | – | – |
| <i>Pestalotiopsis nanningensis</i>     | CSUFTCC10*      | <i>Camellia oleifera</i>          | China            | OK493596 | OK507966 | OK562371 | – | – | – | – | – | – |
| <i>Pestalotiopsis neolitseae</i>       | NTUCC 17-011*   | <i>Neolitsea villosa</i>          | China            | MH809383 | MH809391 | MH809387 | – | – | – | – | – | – |
| <i>Pestalotiopsis neolitseae</i>       | CFCC 54590      | <i>Lithocarpus amygdalifolius</i> | China            | OK339744 | OK358505 | OK358520 | – | – | – | – | – | – |
| <i>Pestalotiopsis novae-hollandiae</i> | CBS 130973*     | <i>Banksia grandis</i>            | Australia        | KM199337 | KM199511 | KM199425 | – | – | – | – | – | – |
| <i>Pestalotiopsis oryzae</i>           | CBS 111522      | <i>Telopea</i> sp.                | USA              | KM199294 | KM199493 | KM199394 | – | – | – | – | – | – |
| <i>Pestalotiopsis oryzae</i>           | CBS 171.26      | NA                                | Italy            | KM199304 | KM199494 | KM199397 | – | – | – | – | – | – |
| <i>Pestalotiopsis oryzae</i>           | CBS 353.69*     | <i>Oryza sativa</i>               | Denmark          | KM199299 | KM199496 | KM199398 | – | – | – | – | – | – |
| <i>Pestalotiopsis pallidotheae</i>     | MAFF 240993*    | <i>Pieris japonica</i>            | Japan            | AB482220 | –        | –        | – | – | – | – | – | – |
| <i>Pestalotiopsis pandanicola</i>      | MFLUCC 16-0255* | <i>Pandanus</i> sp.               | Thailand         | MH388361 | MH388396 | MH412723 | – | – | – | – | – | – |
| <i>Pestalotiopsis papuana</i>          | CBS 331.96*     | coastal soil                      | Papua New Guinea | KM199321 | KM199491 | KM199413 | – | – | – | – | – | – |
| <i>Pestalotiopsis papuana</i>          | CBS 887.96      | <i>Cocos nucifera</i>             | Papua New Guinea | KM199318 | KM199492 | KM199415 | – | – | – | – | – | – |
| <i>Pestalotiopsis parva</i>            | CBS 265.37      | <i>Delonix regia</i>              | NA               | KM199312 | KM199508 | KM199404 | – | – | – | – | – | – |
| <i>Pestalotiopsis parva</i>            | CBS 278.35*     | <i>Delonix regia</i>              | NA               | KM199313 | KM199509 | KM199405 | – | – | – | – | – | – |
| <i>Pestalotiopsis photiniicola</i>     | GZCC 16-0028*   | <i>Photinia serrulata</i>         | China            | KY092404 | KY047662 | KY047663 | – | – | – | – | – | – |
| <i>Pestalotiopsis pini</i>             | MEAN 1092       | <i>Pinus pinea</i>                | Portugal         | MT374680 | MT374693 | MT374705 | – | – | – | – | – | – |
| <i>Pestalotiopsis pinicola</i>         | KUMCC 19-0183*  | <i>Pinus armandii</i>             | China            | MN412636 | MN417509 | MN417507 | – | – | – | – | – | – |
| <i>Pestalotiopsis portugalica</i>      | CBS 393.48*     | NA                                | Portugal         | KM199335 | KM199510 | KM199422 | – | – | – | – | – | – |
| <i>Pestalotiopsis rhizophorae</i>      | MFLUCC 17-0416* | <i>Rhizophora mucronata</i>       | Thailand         | MK764283 | MK764327 | MK764349 | – | – | – | – | – | – |
| <i>Pestalotiopsis rhododendri</i>      | IFRDCC 2399*    | <i>Rhododendron sinogrande</i>    | China            | KC537804 | KC537811 | KC537818 | – | – | – | – | – | – |

|                                             |                 |                                   |                 |          |          |          |   |   |   |   |   |   |
|---------------------------------------------|-----------------|-----------------------------------|-----------------|----------|----------|----------|---|---|---|---|---|---|
| <i>Pestalotiopsis rhodomyrtus</i>           | LC4458          | <i>Camellia sinensis</i>          | China           | KX895010 | KX895228 | KX895342 | – | – | – | – | – | – |
| <i>Pestalotiopsis rhodomyrtus</i>           | HGUP4230*       | <i>Rhodomyrtus tomentosa</i>      | China           | KF412648 | KF412645 | KF412642 | – | – | – | – | – | – |
| <i>Pestalotiopsis rhodomyrtus</i>           | CFCC 54733      | <i>Quercus aliena</i>             | China           | OM746310 | OM840082 | OM839983 | – | – | – | – | – | – |
| <i>Pestalotiopsis rhodomyrtus</i>           | CFCC 55052      | <i>Cyclobalanopsis augustinii</i> | China           | OM746311 | OM840083 | OM839984 | – | – | – | – | – | – |
| <i>Pestalotiopsis rosea</i>                 | MFLUCC 12-0258* | <i>Pinus</i> sp.                  | China           | JX399005 | JX399069 | JX399036 | – | – | – | – | – | – |
| <i>Pestalotiopsis scoparia</i>              | CBS 176.25*     | <i>Chamaecyparis</i> sp.          | China           | KM199330 | KM199478 | KM199393 | – | – | – | – | – | – |
| <i>Pestalotiopsis sequoiae</i>              | MFLUCC 13-0399* | <i>Sequoia sempervirens</i>       | Italy           | KX572339 | –        | –        | – | – | – | – | – | – |
| <i>Pestalotiopsis shaanxiensis</i>          | CFCC 54958*     | <i>Quercus variabilis</i>         | China           | ON007026 | ON005043 | ON005054 | – | – | – | – | – | – |
| <i>Pestalotiopsis shaanxiensis</i>          | CFCC 57356      | <i>Quercus variabilis</i>         | China           | ON007027 | ON005044 | ON005055 | – | – | – | – | – | – |
| <i>Pestalotiopsis silvicola</i>             | CFCC 55296*     | <i>Cyclobalanopsis kerrii</i>     | China           | ON007032 | ON005049 | ON005060 | – | – | – | – | – | – |
| <i>Pestalotiopsis silvicola</i>             | CFCC 54915      | <i>Cyclobalanopsis kerrii</i>     | China           | ON007033 | ON005050 | ON005061 | – | – | – | – | – | – |
| <i>Pestalotiopsis silvicola</i>             | CFCC 57363      | <i>Cyclobalanopsis kerrii</i>     | China           | ON007034 | ON005051 | ON005062 | – | – | – | – | – | – |
| <i>Pestalotiopsis spathulata</i>            | CBS 356.86*     | <i>Gevuina avellana</i>           | Chile           | KM199338 | KM199513 | KM199423 | – | – | – | – | – | – |
| <i>Pestalotiopsis spathuliappendiculata</i> | CBS 144035*     | <i>Phoenix canariensis</i>        | Australia       | MH554172 | MH554607 | MH554845 | – | – | – | – | – | – |
| <i>Pestalotiopsis telopeae</i>              | CBS 114137      | <i>Protea</i> sp.                 | Australia       | KM199301 | KM199559 | KM199469 | – | – | – | – | – | – |
| <i>Pestalotiopsis telopeae</i>              | CBS 114161*     | <i>Telopea</i> sp.                | Australia       | KM199296 | KM199500 | KM199403 | – | – | – | – | – | – |
| <i>Pestalotiopsis telopeae</i>              | CBS 113606      | <i>Telopea</i> sp.                | Australia       | KM199295 | KM199498 | KM199402 | – | – | – | – | – | – |
| <i>Pestalotiopsis terricola</i>             | CBS 141.69*     | soil                              | Pacific Islands | MH554004 | MH554438 | MH554680 | – | – | – | – | – | – |
| <i>Pestalotiopsis thailandica</i>           | MFLUCC 17-1616* | <i>Rhizophora mucronata</i>       | Thailand        | MK764285 | MK764329 | MK764351 | – | – | – | – | – | – |
| <i>Pestalotiopsis trachycarpicola</i>       | OP068*          | <i>Trachycarpus fortunei</i>      | China           | JQ845947 | JQ845946 | JQ845945 | – | – | – | – | – | – |

|                                       |                 |                                |       |          |          |          |   |   |   |   |   |   |
|---------------------------------------|-----------------|--------------------------------|-------|----------|----------|----------|---|---|---|---|---|---|
| <i>Pestalotiopsis trachycarpicola</i> | IFRDCC 2403     | <i>Podocarpus macrophyllus</i> | China | KC537809 | KC537816 | KC537823 | – | – | – | – | – | – |
| <i>Pestalotiopsis trachycarpicola</i> | LC4523          | <i>Camellia sinensis</i>       | China | KX895011 | KX895230 | KX895344 | – | – | – | – | – | – |
| <i>Pestalotiopsis unicolor</i>        | MFLUCC 12-0276* | <i>Rhododendron</i> sp.        | China | JX398999 | –        | JX399030 | – | – | – | – | – | – |
| <i>Pestalotiopsis unicolor</i>        | MFLUCC 12-0275  | unidentified tree              | China | JX398998 | JX399063 | JX399029 | – | – | – | – | – | – |
| <i>Pestalotiopsis verruculosa</i>     | MFLUCC 12-0274* | <i>Rhododendron</i> sp.        | China | JX398996 | JX399061 | –        | – | – | – | – | – | – |
| <i>Pestalotiopsis yanglingensis</i>   | LC4553*         | <i>Camellia sinensis</i>       | China | KX895012 | KX895231 | KX895345 | – | – | – | – | – | – |
| <i>Pestalotiopsis yanglingensis</i>   | LC3412          | <i>Camellia sinensis</i>       | China | KX894980 | KX895197 | KX895312 | – | – | – | – | – | – |
| <i>Pestalotiopsis yunnanensis</i>     | HMAS 96359*     | <i>Podocarpus macrophyllus</i> | China | AY373375 | –        | –        | – | – | – | – | – | – |

<sup>1</sup> Acronyms: ATCC: American Type Culture Collecton, Virginia, USA; BBH: BIOTEC Bangkok Herbarium, National Science and Technology Development Agency, Thailand; CBS: Westerdijk Fungal Biodiversity Institute (CBS-KNAW Fungal Biodiversity Centre), Utrecht, The Netherlands; CFCC: China Forestry Culture Collection Centre, Beijing, China; CMW: Culture collection of Michael Wingfield, University of Pretoria, South Africa; CPC: Culture collection of Pedro Crous, The Netherlands; IMI: Culture collection of the International Mycological Institute, CABI Bioscience, Egham, Surrey, UK; MFLU: Mae Fah Luang University herbarium, Thailand; MFLUCC: Mae Fah Luang University Culture Collection, Thailand; MUCC: Murdoch University Culture Collection, Perth, Australia; NE: Gerard Adams collections, University of Nebraska, Lincoln NE, USA; PPRI: Culture collection of the Plant Protection Research Institute, Agriculture Research Center, Pretoria, South Africa; XJAU: Xinjiang Agricultural University, Xinjiang, China; NA: not applicable. All the new isolates used in this study are in bold and the type materials are marked with \*.
