# Supplementary figures and images for: The Potential Fungal Pathogens of Euonymus japonicus in Beijing, China
Source: MDPI journal article supplement (doi:10.3390/jof9020271), 2023-02-18

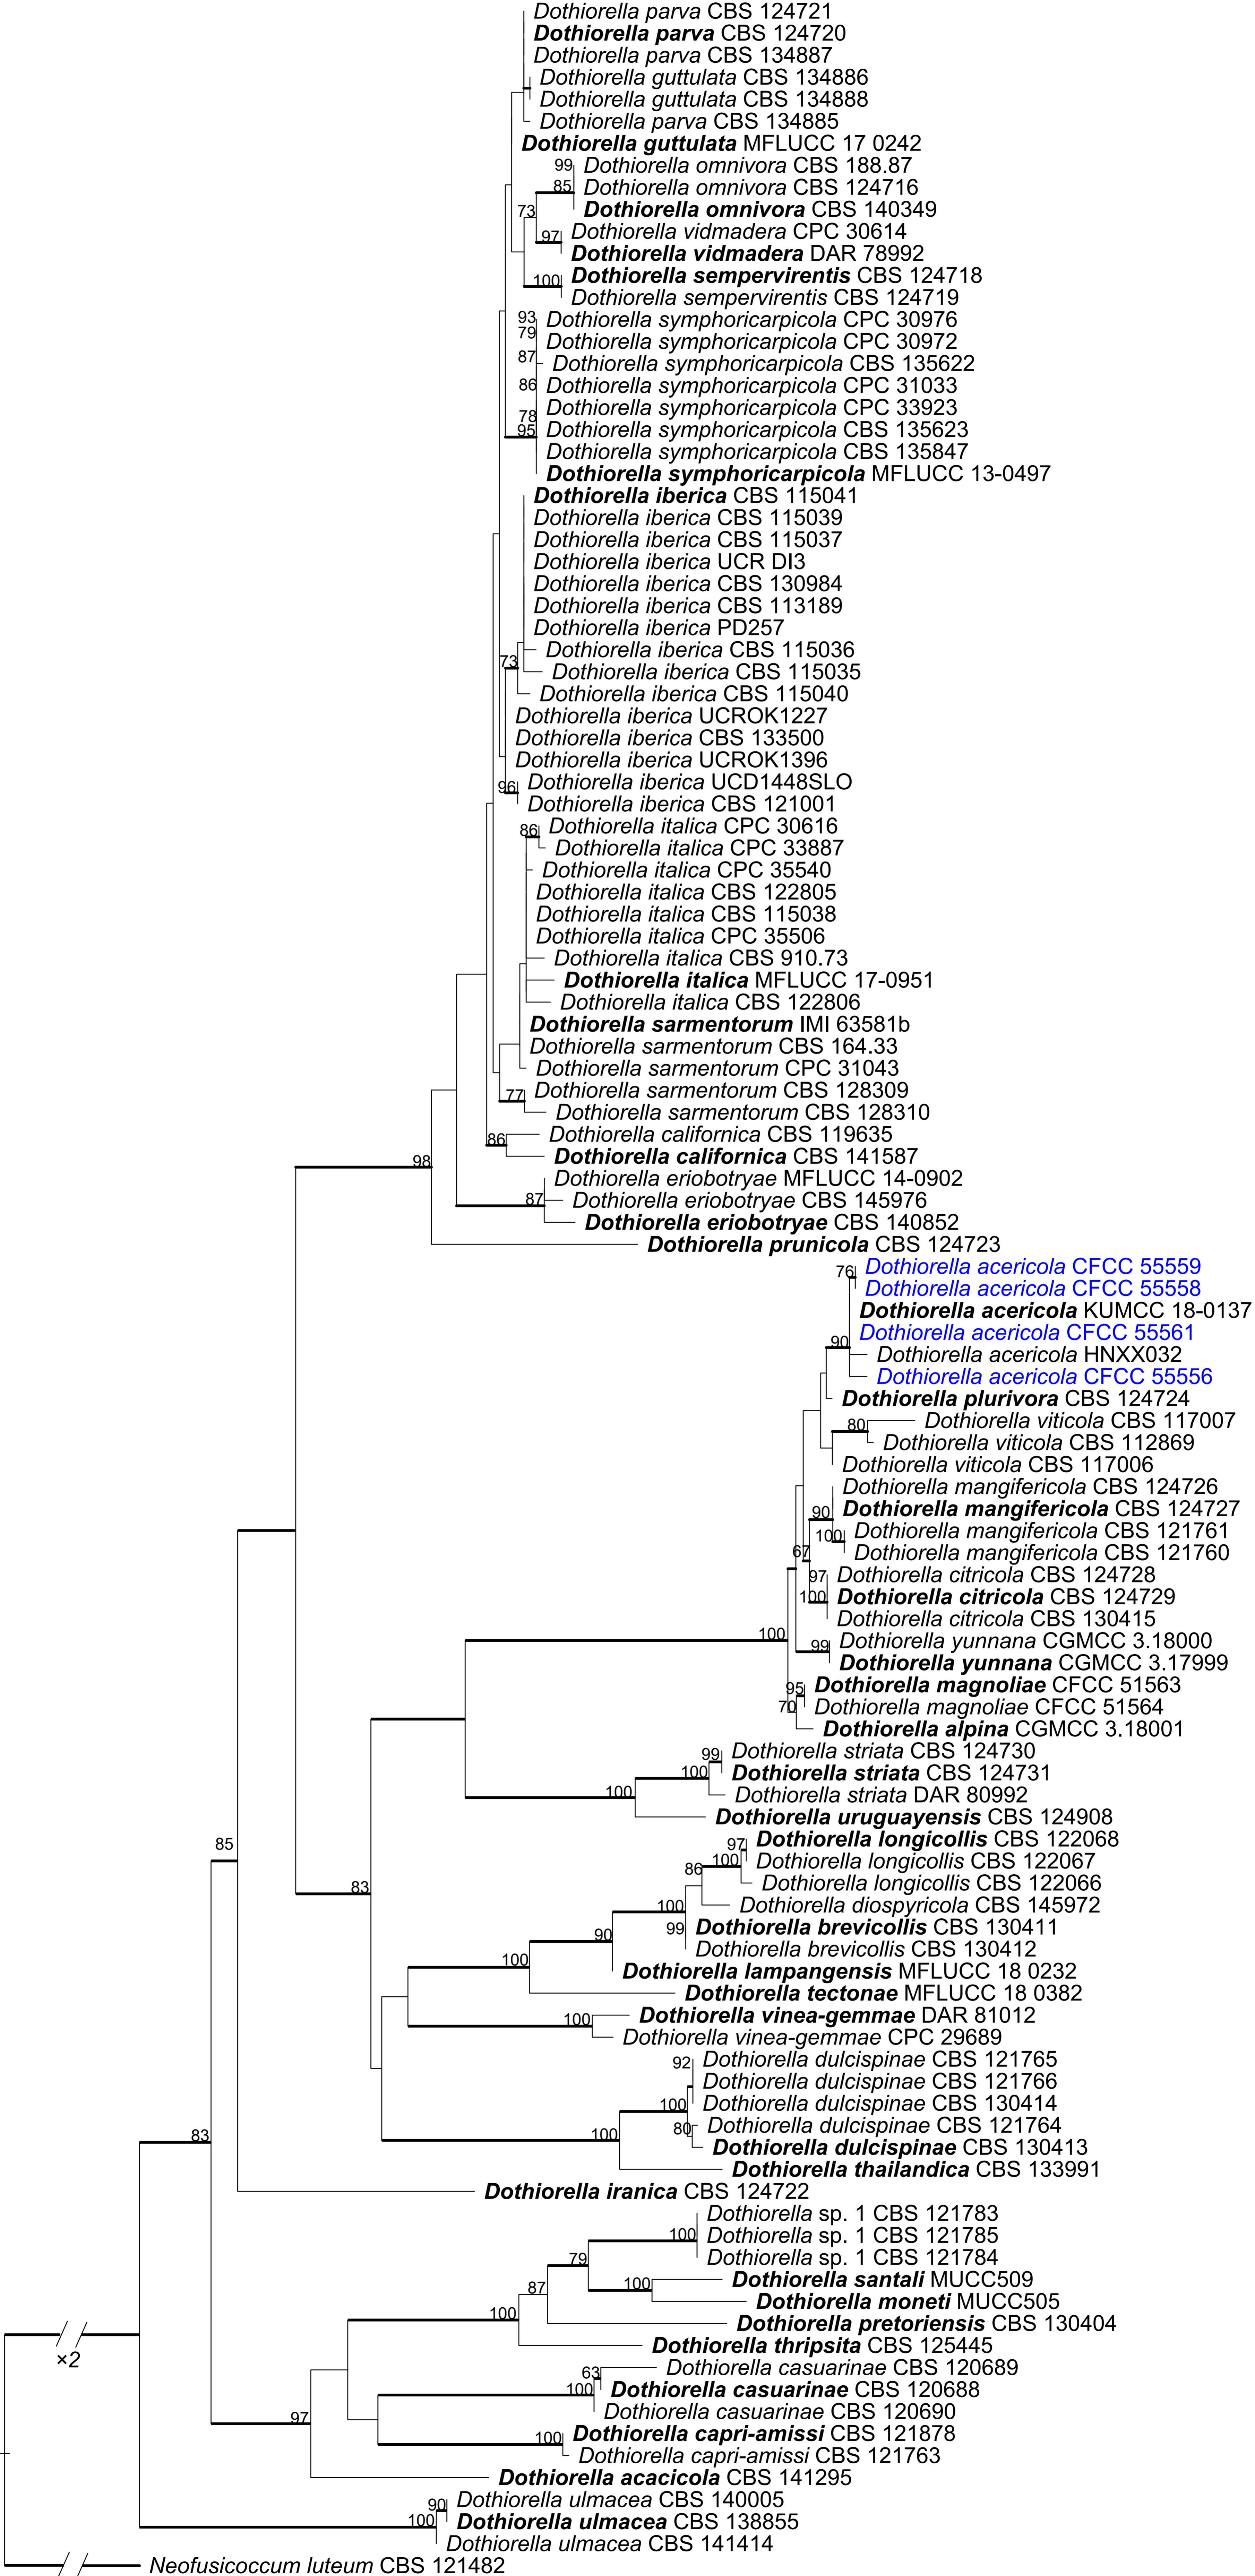

Supplement: s1 [file s1]

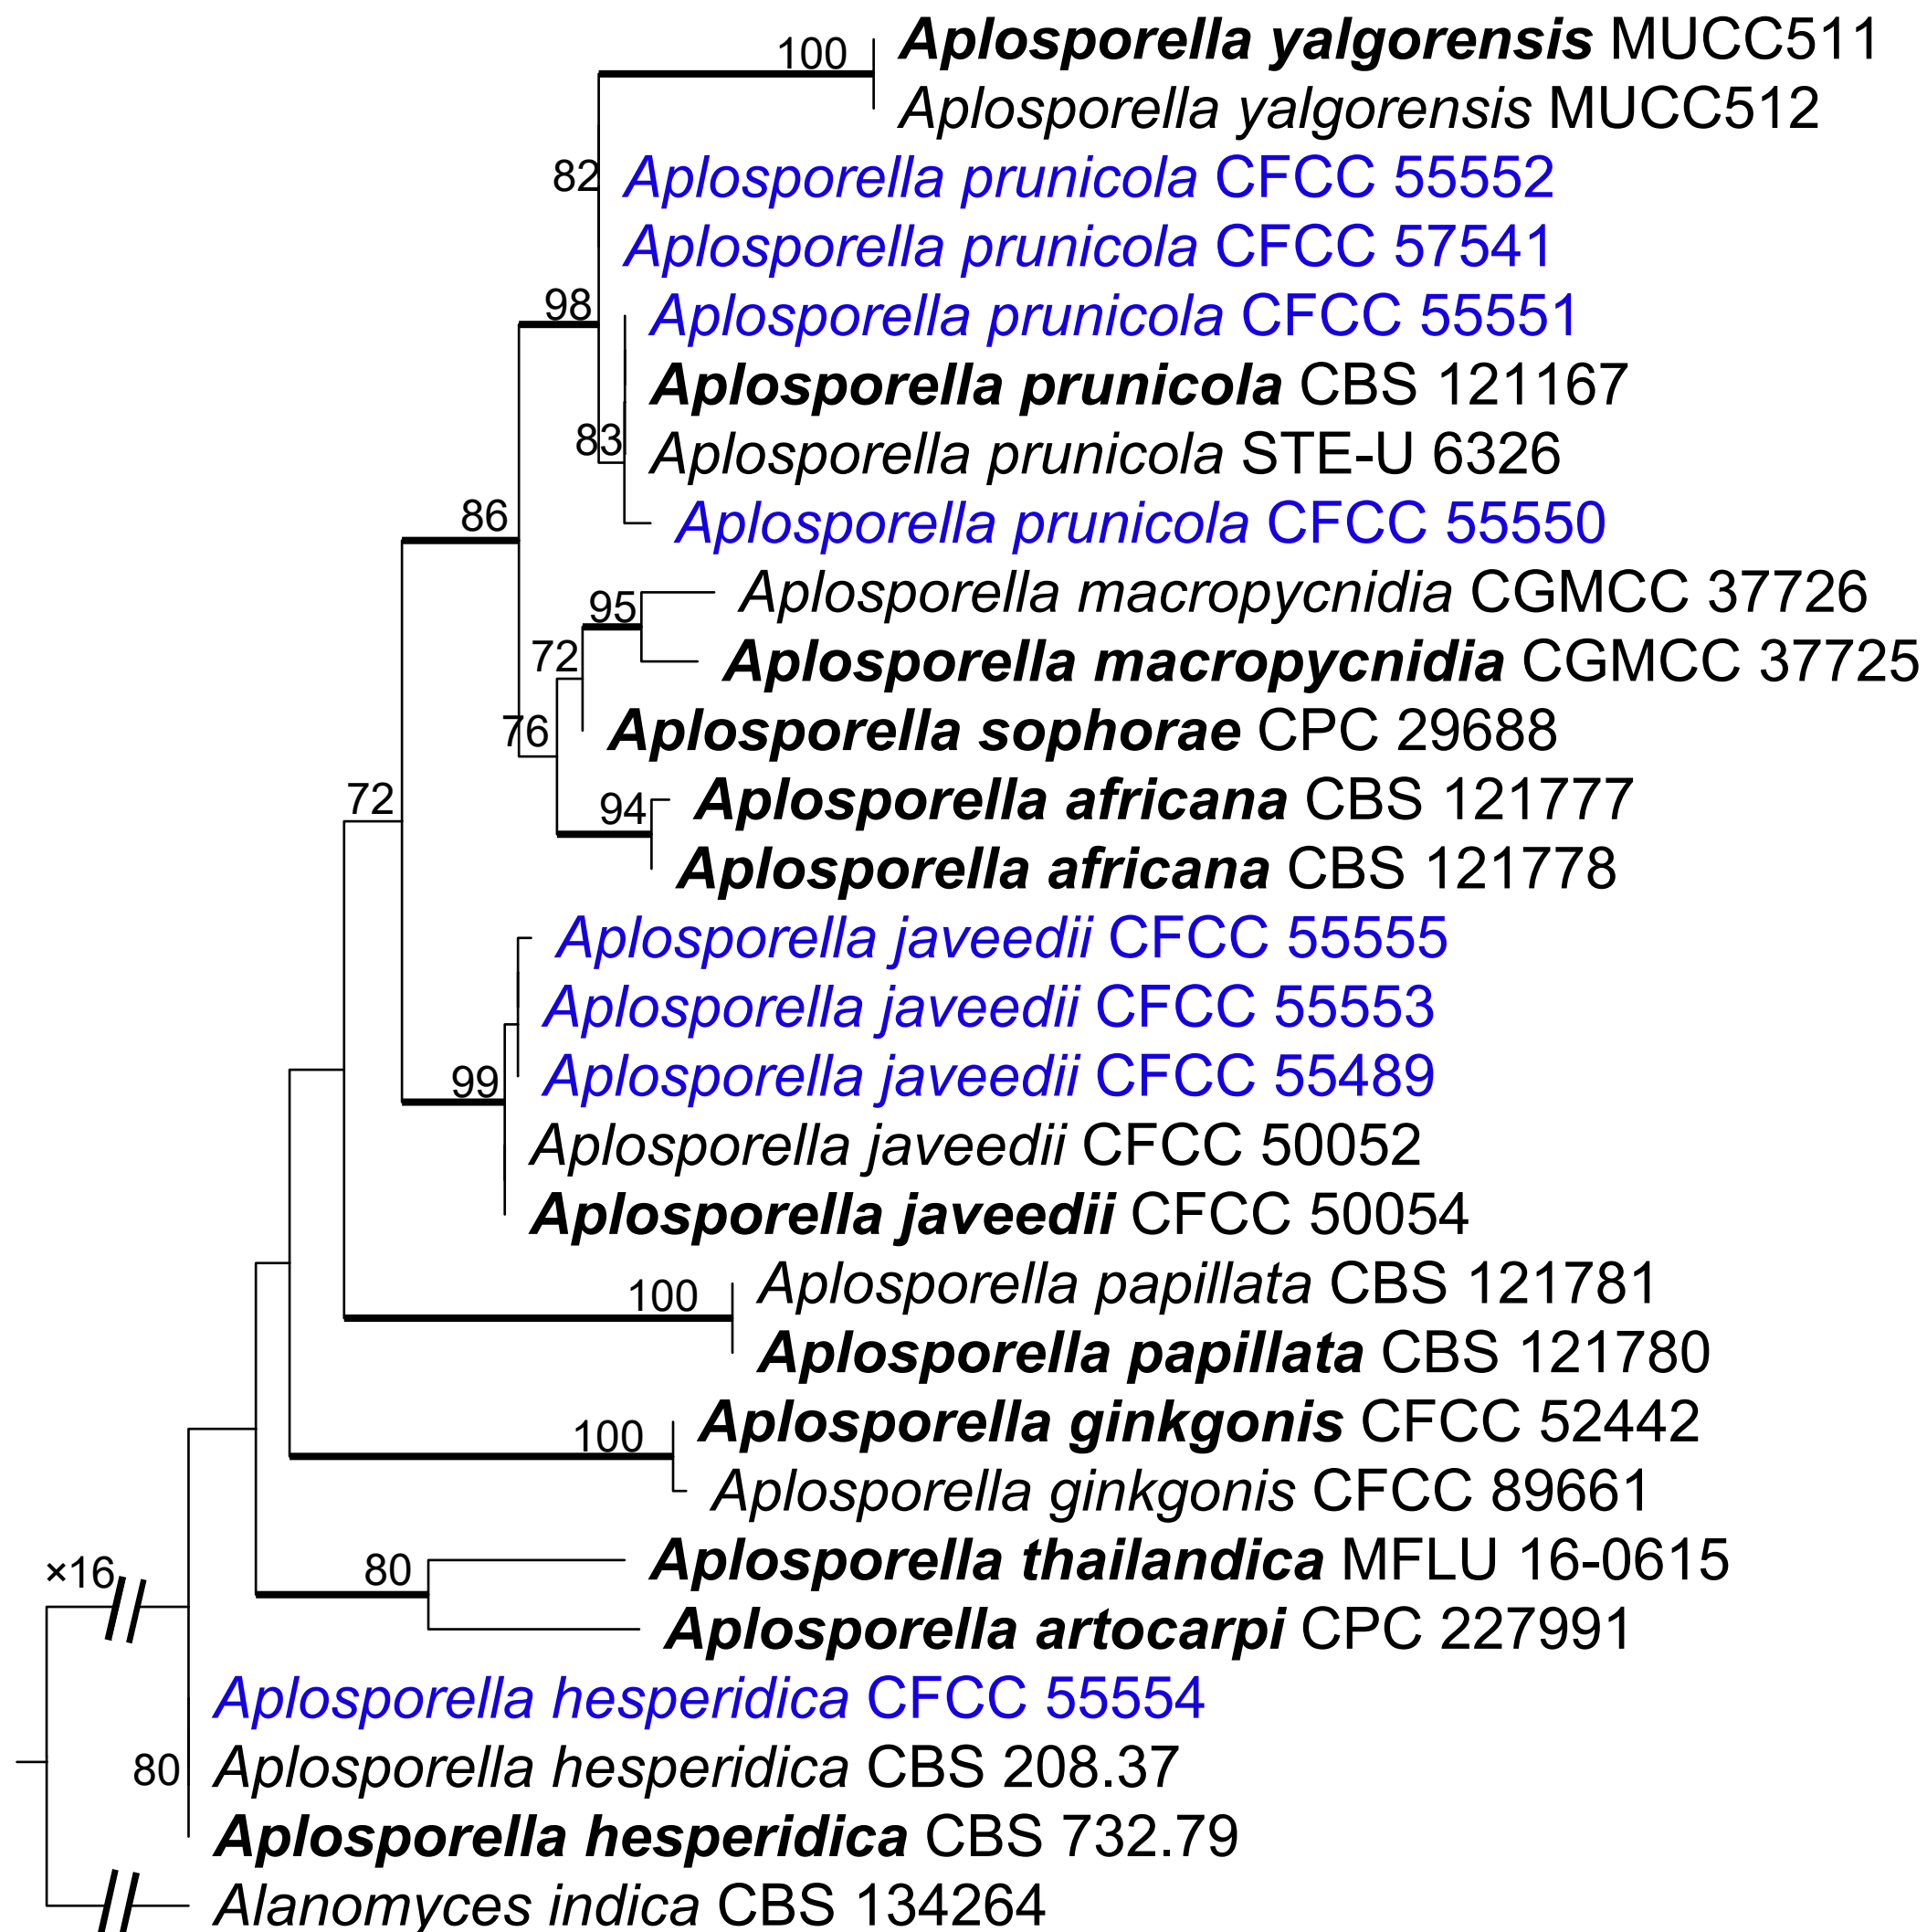

Supplement: s1 [file s1]

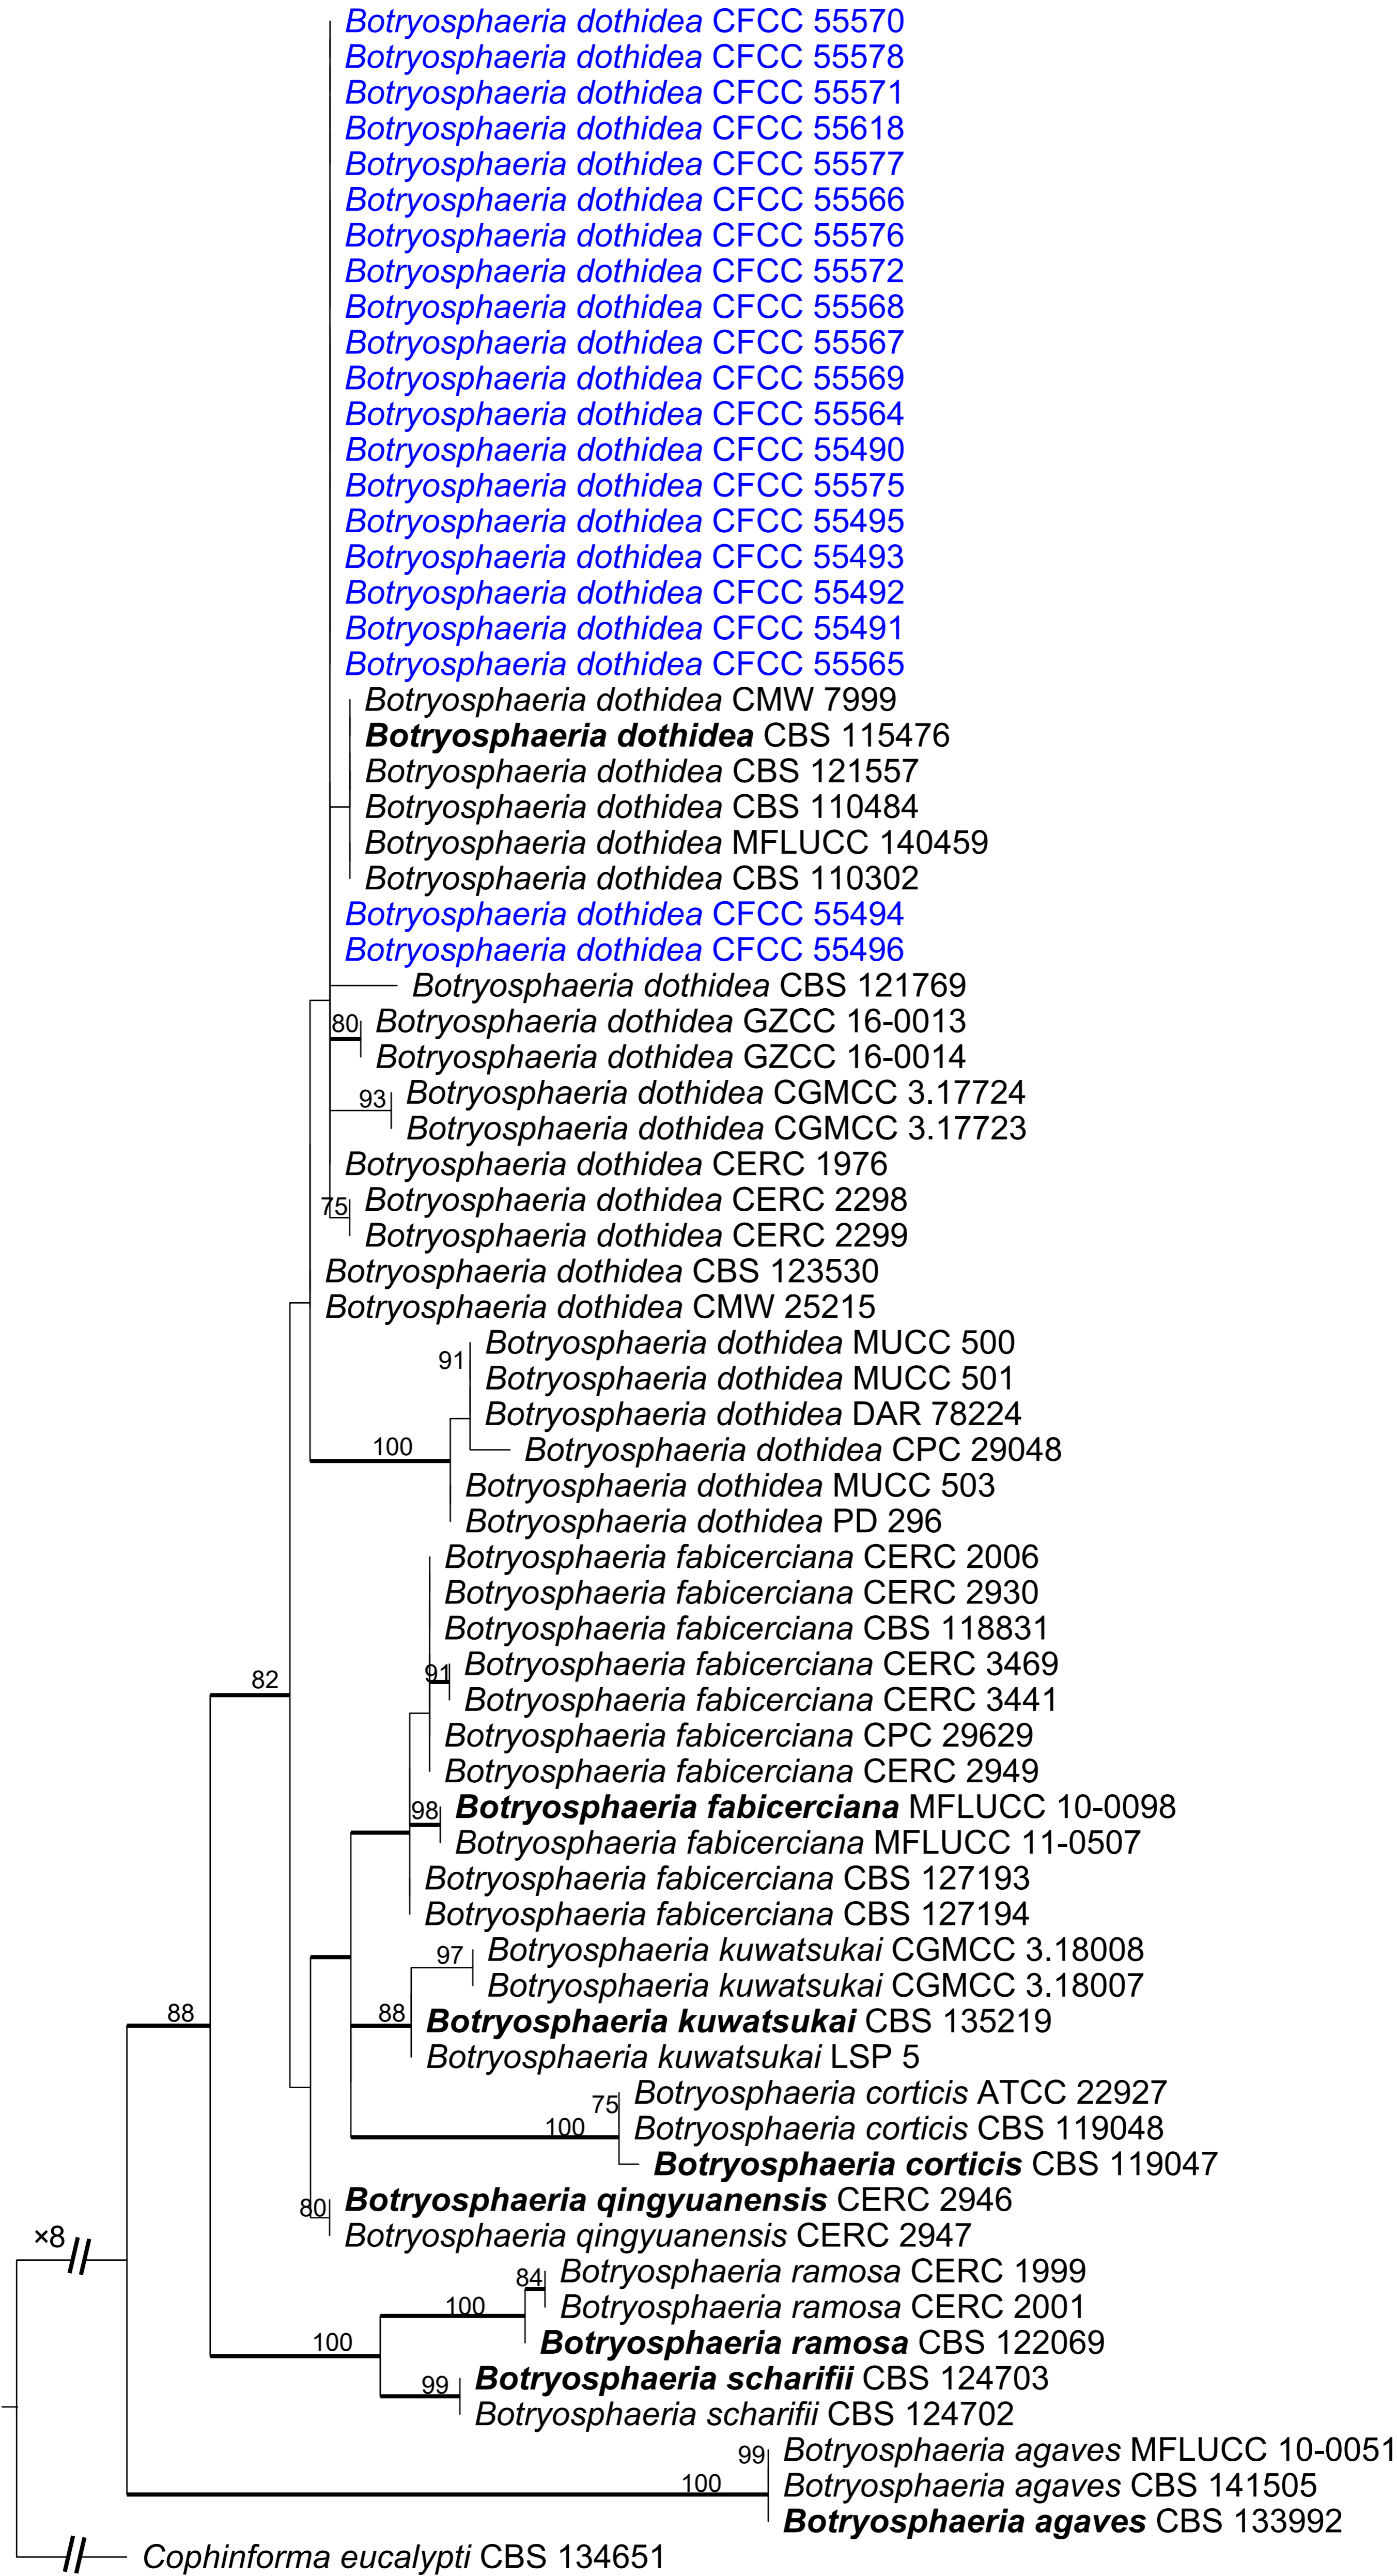

Supplement: s1 [file s1]

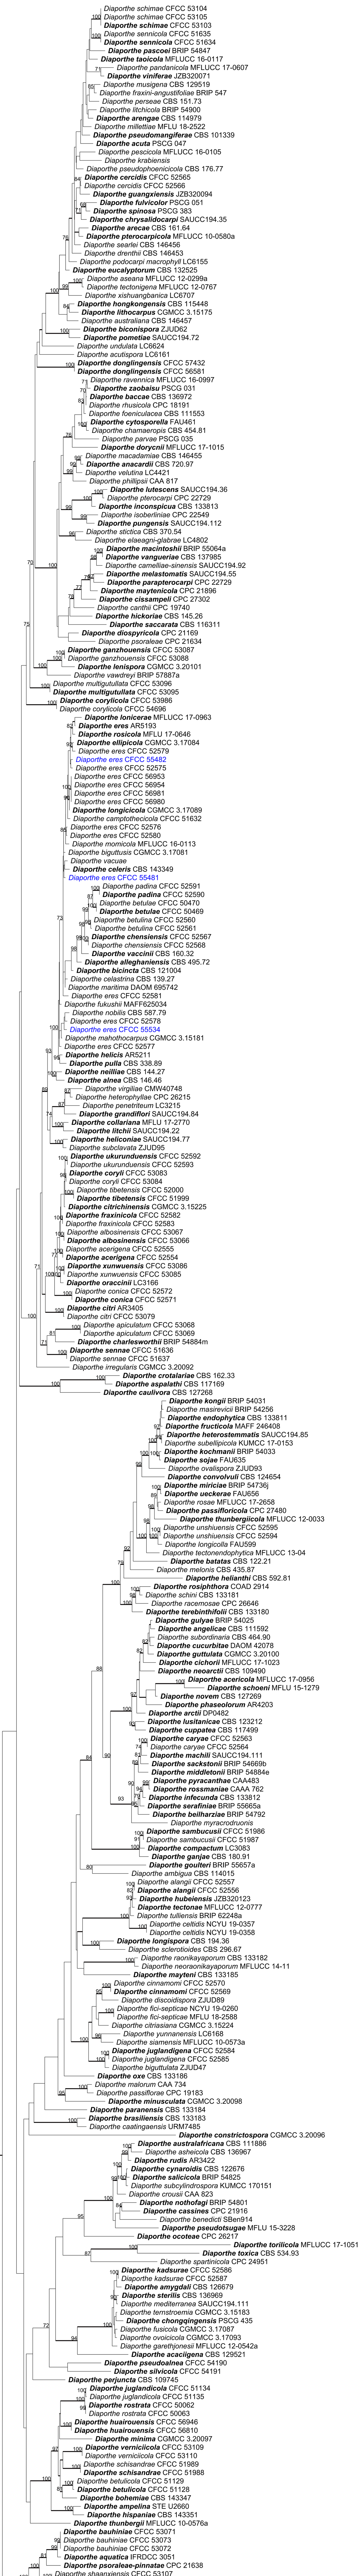

Supplement: s1 [file s1]
